# Supplementary material for: Identification of hub genes and potential molecular mechanisms in gastric cancer by integrated bioinformatics analysis
Source: PeerJ. 2018 Jul 2;6:e5180. doi: 10.7717/peerj.5180 (PMC6033081; doi:10.7717/peerj.5180)
Supplement: Supplemental Information 4 [file peerj-06-5180-s004.xlsx]

## Sheet: GSE93415
ID	adj.P.Val	P.Value	t	B	logFC	miRNA_ID_LIST	SPOT_ID
169133	1.79e-08	2.33e-11	-9.0975	15.8191	-0.8819	hsa-miR-4537
10972	1.79e-08	4.19e-11	8.90515	15.2515	1.20595	hsa-miR-181b-5p
169282	1.79e-08	8.88e-11	-8.66078	14.5236	-1.2741	hsa-miR-4290
147942	1.79e-08	9.13e-11	-8.65179	14.4967	-1.2915	hsa-miR-4268
169182	1.79e-08	9.2e-11	-8.64926	14.4891	-0.9025	hsa-miR-4728-3p
146076	2.55e-08	1.57e-10	-8.47659	13.9702	-1.2792		no information
147767	2.7e-08	1.94e-10	-8.40929	13.767	-1.08415	hsa-miR-4279
169380	4.99e-08	4.51e-10	-8.13866	12.9448	-0.8981	hsa-miR-3124-3p
169034	4.99e-08	5.06e-10	-8.1022	12.8334	-0.90115	hsa-miR-642b-5p
42744	4.99e-08	5.12e-10	8.09824	12.8213	1.6759	hsa-miR-23a-3p
148622	5.9e-08	6.8e-10	-8.00836	12.546	-0.73745	hsa-miR-877-3p
27961	5.9e-08	7.27e-10	-7.98733	12.4815	-1.2999	hsa-miR-891a
168849	6.49e-08	9.07e-10	-7.91716	12.2659	-0.98865	hsa-miR-4635
169274	6.49e-08	9.43e-10	-7.9049	12.2282	-0.573	hsa-miR-5196-3p
42865	6.49e-08	1.02e-09	7.88025	12.1523	1.15225	hsa-miR-181a-5p
147616	6.49e-08	1.12e-09	7.85171	12.0644	1.49555	hsa-miR-4291
168739	6.49e-08	1.13e-09	-7.84712	12.0502	-1.01665	hsa-miR-1269b
42887	9.39e-08	1.73e-09	7.7129	11.6356	1.17655	hsa-miR-331-3p
145666	1.13e-07	2.2e-09	7.63811	11.4038	0.91345		SNORD110
168625	1.15e-07	2.36e-09	-7.61674	11.3375	-1.4428	hsa-miR-4539
19606	1.4e-07	3.02e-09	7.53914	11.0963	0.82505		SNORD12
147947	1.87e-07	4.22e-09	-7.4345	10.7703	-0.91725	hsa-miR-4308
19008	2.4e-07	5.67e-09	7.3424	10.4826	0.9063		SNORD2
46642	2.57e-07	6.33e-09	-7.30829	10.3759	-0.9567	hsa-miR-1276
145633	4.27e-07	1.1e-08	-7.13791	9.84163	-1.5582	hsa-let-7d-3p
11014	4.58e-07	1.22e-08	7.10394	9.73489	1.6432	hsa-miR-214-3p
42723	4.88e-07	1.42e-08	-7.05783	9.58986	-0.7167	hsa-miR-195-3p
148621	4.88e-07	1.44e-08	-7.05277	9.57394	-0.84695	hsa-miR-892a
169408	4.88e-07	1.45e-08	7.05056	9.56697	1.02855	hsa-miR-181d
169375	5.66e-07	1.74e-08	-6.99472	9.39116	-1.34425	hsa-miR-660-3p
19605	6.48e-07	2.07e-08	6.94181	9.22441	0.97415		SNORD6
19013	6.48e-07	2.13e-08	6.93272	9.19574	0.8449		SNORD14B
168864	6.76e-07	2.29e-08	6.91027	9.12493	0.88955	hsa-miR-320d
168748	7.59e-07	2.65e-08	6.86516	8.98255	0.86365	hsa-miR-320e
147738	8.7e-07	3.12e-08	-6.81446	8.82242	-0.6116	hsv2-miR-H20
169363	1.23e-06	4.59e-08	6.69608	8.44808	0.90035	hsa-miR-320c
169168	1.23e-06	4.65e-08	-6.69162	8.43397	-0.90375	hsa-miR-5580-3p
147772	1.46e-06	5.73e-08	-6.62777	8.23183	-0.6563	hsa-miR-4303
46324	1.46e-06	5.86e-08	6.6209	8.21007	0.8586	hsa-miR-320b
46205	1.79e-06	7.36e-08	6.55059	7.98732	0.7812		SNORD48
168904	1.8e-06	7.58e-08	-6.54158	7.95876	-0.8368	hsa-miR-4473
42766	1.89e-06	8.13e-08	-6.52035	7.89146	-0.62795	hsa-miR-554
145693	1.95e-06	8.67e-08	6.50041	7.82826	1.1539	hsa-miR-92a-3p
27533	1.95e-06	9.01e-08	6.48875	7.79128	0.88295	hsa-miR-320a
42584	1.95e-06	9.04e-08	-6.48753	7.78743	-0.65895	hsa-miR-432-3p
168729	1.95e-06	9.18e-08	-6.48277	7.77231	-1.37635	hsa-miR-4661-5p
168954	2.02e-06	9.76e-08	-6.46399	7.71276	-0.5237	hsa-miR-5580-5p
46863	2.02e-06	9.96e-08	-6.45791	7.6935	-0.60335	hsa-miR-3157-3p
169358	2.04e-06	1.03e-07	6.44894	7.66502	0.9111	hsa-miR-4417
168789	2.08e-06	1.07e-07	-6.43681	7.62655	-0.65885	hsa-miR-4686
30687	2.11e-06	1.12e-07	6.42097	7.57632	1.2741	hsa-miR-93-5p
168578	2.11e-06	1.13e-07	-6.42026	7.57405	-0.8239	hsa-miR-5190
147923	2.4e-06	1.31e-07	6.37449	7.42885	0.7223	hsa-miR-3142
42669	2.57e-06	1.43e-07	6.34782	7.34423	0.72355	hsa-miR-505-3p
169299	3.18e-06	1.79e-07	-6.27759	7.12134	-0.83735	hsa-miR-4538
42823	3.71e-06	2.13e-07	6.22503	6.9545	0.7202	hsa-miR-27b-5p
145956	3.83e-06	2.24e-07	6.20995	6.90663	0.68005		no information
168570	4e-06	2.38e-07	-6.19128	6.84738	-0.51585	hsa-miR-2682-3p
42524	4.35e-06	2.71e-07	6.15075	6.71874	1.0627	hsa-miR-21-3p
33902	4.35e-06	2.72e-07	6.15002	6.7164	0.865	hsa-miR-128
147673	4.35e-06	2.72e-07	6.14972	6.71546	1.29615	hsa-miR-4262
168848	4.51e-06	2.87e-07	-6.13386	6.66512	-0.34675	hsa-miR-4700-3p
10990	4.96e-06	3.21e-07	6.09955	6.55623	1.84665	hsa-miR-196a-5p
145897	5.72e-06	3.81e-07	6.04709	6.38976	0.64	hsa-miR-92b-3p
19588	5.72e-06	3.82e-07	6.04626	6.38712	0.91405	hsa-miR-17-3p
145822	5.73e-06	3.88e-07	6.04132	6.37142	1.34045	hsa-miR-214-5p
19011	5.82e-06	4e-07	6.03175	6.34105	1.8342		SNORD10
148049	6.43e-06	4.48e-07	-5.99686	6.23038	-0.82645	hsa-miR-3924
146113	6.45e-06	4.59e-07	5.98962	6.2074	0.82825		no information
169142	6.45e-06	4.64e-07	5.98624	6.19668	0.42475	hsa-miR-550a-5p
148554	6.45e-06	4.69e-07	-5.98283	6.18589	-0.53855	hsa-miR-3917
148132	6.61e-06	4.88e-07	-5.97068	6.14735	-0.3577	hsa-miR-3622a-3p
168923	7.07e-06	5.3e-07	-5.9459	6.06874	-0.6474	hsa-miR-4688
42682	7.59e-06	5.76e-07	5.92031	5.98762	0.9901	hsa-miR-25-3p
168721	7.63e-06	5.89e-07	5.9135	5.96602	0.74295	hsa-miR-4701-5p
169170	7.63e-06	5.94e-07	-5.91049	5.95649	-0.9419	hsa-miR-4472
147891	8.46e-06	6.68e-07	5.87456	5.84258	1.0534	hsa-miR-3175
168758	8.72e-06	6.97e-07	-5.86165	5.80169	-0.8916	hsa-miR-4425
29562	9.4e-06	7.61e-07	5.83462	5.71605	1.9549	hsa-miR-199a-5p
147743	9.44e-06	7.74e-07	5.82947	5.69971	0.95255	hsa-miR-4275
169359	9.9e-06	8.22e-07	-5.811	5.64123	-0.63785	hsa-miR-3160-5p
17872	1e-05	8.41e-07	-5.80404	5.61918	-0.67055	hsa-miR-148a-5p
168660	1.07e-05	9.19e-07	-5.77708	5.53382	-0.7326	hsa-miR-5000-5p
46206	1.07e-05	9.19e-07	5.77697	5.53347	1.32985		SNORD44
42694	1.11e-05	9.67e-07	-5.76127	5.48378	-0.66885	hsa-miR-485-3p
168982	1.11e-05	9.75e-07	-5.75888	5.4762	-0.88405	hsa-miR-4757-3p
168985	1.53e-05	1.36e-06	-5.6565	5.15242	-0.62815	hsa-miR-4722-5p
168997	1.7e-05	1.54e-06	-5.61934	5.03504	-0.6381	hsa-miR-5584-5p
145889	1.76e-05	1.61e-06	5.60549	4.99132	1.3817	hsa-miR-196b-5p
168941	1.77e-05	1.64e-06	-5.59972	4.97312	-1.06575	hsa-miR-4501
42703	1.87e-05	1.76e-06	-5.57787	4.90415	-0.68815	hsa-miR-490-3p
147776	1.87e-05	1.79e-06	5.57314	4.88923	1.3077	hsa-miR-4317
147792	1.87e-05	1.8e-06	-5.57003	4.87941	-0.53065	hsa-miR-3165
17608	1.87e-05	1.8e-06	5.56997	4.87921	0.7994	hsa-miR-425-5p
168942	1.98e-05	1.93e-06	-5.54918	4.81365	-1.6101	hsa-miR-4636
168674	2.25e-05	2.21e-06	-5.50705	4.68083	-0.6415	hsa-miR-4716-5p
168702	2.29e-05	2.3e-06	-5.49563	4.64487	-0.7	hsa-miR-4540
169203	2.29e-05	2.3e-06	-5.49507	4.6431	-0.6163	hsa-miR-5095
42827	2.35e-05	2.39e-06	5.4835	4.60667	0.69065	hsa-miR-652-3p
169402	2.38e-05	2.44e-06	-5.47653	4.58474	-0.4618	hsa-miR-625-3p
145768	2.76e-05	2.86e-06	-5.42848	4.43352	-1.04775	hsa-miR-665
46381	2.85e-05	2.99e-06	-5.41475	4.39037	-1.3332	hsa-miR-1298
169100	2.88e-05	3.05e-06	-5.40859	4.37101	-0.5778	hsa-miR-4758-3p
168882	2.92e-05	3.14e-06	-5.39895	4.34071	-0.7849	hsa-miR-664b-3p
46625	2.92e-05	3.17e-06	-5.3966	4.33333	-0.4504	hsa-miR-1303
169398	2.92e-05	3.17e-06	-5.3963	4.33237	-0.5669	hsa-miR-5096
10937	2.94e-05	3.23e-06	5.39096	4.31559	0.88575	hsa-miR-132-3p
42739	2.95e-05	3.27e-06	5.38707	4.30338	0.65355	hsa-miR-339-5p
169198	3.05e-05	3.43e-06	-5.37245	4.25748	-0.70375	hsa-miR-3145-5p
10985	3.05e-05	3.44e-06	5.37149	4.25446	0.91285	hsa-miR-191-5p
168950	3.13e-05	3.57e-06	-5.36006	4.21858	-0.28575	hsa-miR-4646-3p
145746	3.56e-05	4.09e-06	5.31758	4.08531	1.1308	hsa-let-7i-3p
168665	3.72e-05	4.31e-06	-5.3014	4.0346	-0.44595	hsa-miR-3619-3p
169194	3.96e-05	4.63e-06	-5.27965	3.96646	-0.62395	hsa-miR-4513
169022	4.04e-05	4.77e-06	5.27022	3.93696	1.12	hsa-miR-4797-5p
146196	4.12e-05	4.9e-06	-5.26176	3.91046	-0.76595	hsa-miR-711
168790	4.33e-05	5.19e-06	-5.24406	3.8551	-0.49735	hsa-miR-3120-5p
169132	4.37e-05	5.28e-06	5.23852	3.83778	0.78865	hsa-miR-382-3p
9938	4.9e-05	5.99e-06	5.19957	3.71603	1.35135	hsa-let-7i-5p
42496	4.9e-05	6.03e-06	5.19752	3.70964	0.9626	hsa-miR-181c-5p
17506	4.93e-05	6.12e-06	5.19304	3.69565	1.4939	hsa-miR-24-3p
169376	5.09e-05	6.37e-06	5.18048	3.65645	0.74135	hsa-miR-5701
168692	5.09e-05	6.42e-06	-5.1783	3.64964	-0.54815	hsa-miR-3688-5p
42885	5.18e-05	6.59e-06	5.17023	3.62446	0.92345	hsa-miR-376a-5p
42834	5.19e-05	6.66e-06	-5.16704	3.61452	-0.3798	hsa-miR-219-2-3p
11065	5.24e-05	6.89e-06	5.15629	3.58099	1.161	hsa-miR-335-5p
169159	5.24e-05	6.9e-06	-5.15596	3.57997	-0.45835	hsa-miR-4521
168700	5.24e-05	6.92e-06	-5.155	3.57697	-0.7051	hsa-miR-5696
147611	5.24e-05	6.93e-06	-5.15468	3.57595	-0.48405	hsa-miR-4305
42829	5.24e-05	7.01e-06	5.15121	3.56514	1.0754	hsa-miR-127-3p
17882	5.24e-05	7.09e-06	5.14761	3.55394	0.4638	hsa-miR-20b-3p
28950	5.24e-05	7.1e-06	5.14702	3.5521	1.13355	hsa-miR-455-3p
14301	5.26e-05	7.18e-06	5.14361	3.54146	0.6501	hsa-miR-361-5p
11024	5.43e-05	7.46e-06	5.1315	3.50374	1.88165	hsa-miR-223-3p
42576	5.45e-05	7.55e-06	5.12796	3.4927	0.36775	hsa-miR-342-5p
147195	5.69e-05	7.94e-06	5.11239	3.44422	1.1581	hsa-miR-18a-5p
148241	5.86e-05	8.23e-06	-5.10101	3.40879	-0.40895	hsa-miR-3649
148217	6.71e-05	9.5e-06	5.05659	3.27071	1.37485	hsa-miR-23c
42964	6.8e-05	9.69e-06	-5.05033	3.25126	-0.5879	hsa-miR-7-2-3p
17898	6.82e-05	9.79e-06	-5.04722	3.24161	-0.60135	hsa-miR-99b-3p
42633	6.92e-05	1e-05	-5.04052	3.22082	-0.45325	hsa-miR-885-3p
145914	7.07e-05	1.03e-05	5.03037	3.18932	1.6218	hsa-miR-135b-5p
169193	7.07e-05	1.04e-05	-5.02911	3.18541	-0.58255	hsa-miR-4725-5p
10919	7.39e-05	1.09e-05	5.01336	3.13656	1.0812	hsa-miR-103a-3p
147861	7.71e-05	1.15e-05	4.99782	3.08841	1.26755		no information
147981	7.79e-05	1.17e-05	4.99278	3.07278	0.5669	hsa-miR-4325
46406	7.95e-05	1.2e-05	4.98428	3.04646	0.66225	hsa-miR-500a-3p
11058	8e-05	1.21e-05	-4.98007	3.03343	-0.4545	hsa-miR-325
145670	8.08e-05	1.23e-05	4.975	3.01773	1.1835	hsa-miR-18b-5p
46336	8.24e-05	1.27e-05	-4.96677	2.99227	-0.4828	hsa-miR-1284
32891	8.43e-05	1.31e-05	4.95764	2.96405	0.4259	hsa-miR-769-5p
147506	8.56e-05	1.35e-05	4.94642	2.92933	1.74065	hsa-miR-21-5p
168887	8.56e-05	1.36e-05	4.94576	2.92731	0.6167	hsa-miR-5089-5p
46801	8.56e-05	1.36e-05	4.94467	2.92393	1.3585	hsa-miR-106a-5p
13143	8.56e-05	1.36e-05	4.9446	2.92371	1.13955	hsa-miR-301a-3p
168995	8.72e-05	1.39e-05	4.93687	2.89982	1.1992	hsa-miR-4791
19582	8.88e-05	1.43e-05	4.92922	2.8762	1.03365	hsa-miR-106b-5p
168910	9.06e-05	1.47e-05	-4.92086	2.8504	-0.55945	hsa-miR-4735-5p
10955	9.32e-05	1.52e-05	-4.90921	2.81445	-1.1978	hsa-miR-148a-3p
148039	9.32e-05	1.53e-05	-4.90746	2.80904	-0.59045	hsa-miR-3925-5p
146140	9.32e-05	1.54e-05	-4.90598	2.80447	-0.32455	hsa-miR-1976
147588	9.41e-05	1.58e-05	4.89839	2.78105	0.71145	hsa-miR-4288
11184	9.41e-05	1.58e-05	4.89759	2.77861	1.0711	hsa-miR-99b-5p
42542	9.41e-05	1.59e-05	4.89599	2.77366	0.438	hsa-miR-589-5p
14285	9.41e-05	1.59e-05	4.89539	2.7718	0.94505	hsa-miR-487b
148420	9.95e-05	1.69e-05	4.87615	2.7125	0.77615	hsa-miR-3607-3p
17593	9.97e-05	1.71e-05	-4.87366	2.70483	-0.86765	hsa-miR-650
168717	0.000102	1.75e-05	-4.86558	2.67997	-0.524	hsa-miR-5193
168832	0.000104	1.8e-05	4.85688	2.65319	0.7388	hsa-miR-4674
10925	0.000105	1.82e-05	4.853	2.64126	1.5553	hsa-miR-10b-5p
147199	0.000111	1.94e-05	4.83296	2.57962	1.5312	hsa-miR-27b-3p
169360	0.000121	2.14e-05	-4.8029	2.4873	-0.75675	hsa-miR-4445-5p
11091	0.000123	2.18e-05	4.79765	2.4712	1.0685	hsa-miR-377-3p
13485	0.00013	2.32e-05	4.77703	2.40798	1.6371	hsa-miR-10a-5p
148620	0.000132	2.36e-05	4.77194	2.39237	1.0083	hsa-miR-454-3p
17888	0.000133	2.4e-05	4.76688	2.37688	1.0297	hsa-let-7a-3p
42696	0.000135	2.45e-05	-4.7602	2.35644	-1.09755	hsa-miR-943
17498	0.000135	2.46e-05	-4.75894	2.35259	-0.37515	hsa-miR-601
10923	0.000153	2.81e-05	4.71657	2.22304	0.89335	hsa-miR-107
169035	0.000153	2.82e-05	-4.71556	2.21994	-0.50855	hsa-miR-4658
148327	0.000153	2.86e-05	4.7119	2.20879	0.7579	hsa-miR-3651
168805	0.000153	2.86e-05	-4.71104	2.20615	-0.6896	hsa-miR-4478
42902	0.000155	2.91e-05	4.7059	2.19045	0.30775	hsa-miR-185-5p
30787	0.000158	2.98e-05	4.69867	2.16841	1.98925	hsa-miR-125b-5p
42475	0.00016	3.03e-05	4.69352	2.15269	0.29765	hsa-miR-221-5p
17463	0.00016	3.04e-05	4.69187	2.14767	0.6363	hsa-miR-151a-3p
168776	0.00016	3.07e-05	-4.68965	2.14089	-1.32	hsa-miR-4795-3p
145708	0.000161	3.11e-05	4.68554	2.12837	0.50175	hsa-miR-324-3p
148263	0.000167	3.24e-05	-4.67216	2.0876	-0.657	hsa-miR-1273e
17624	0.00017	3.31e-05	4.66501	2.06582	0.69995	hsa-miR-532-5p
11022	0.000174	3.41e-05	4.65576	2.03766	0.7946	hsa-miR-221-3p
146117	0.000174	3.43e-05	-4.6541	2.03262	-0.95135	hsv1-miR-H6-3p
21702	0.000174	3.44e-05	-4.6529	2.02896	-0.2538	hsa-miR-219-1-3p
17863	0.000175	3.48e-05	-4.64953	2.01872	-0.56385	hsa-miR-934
13137	0.000178	3.56e-05	-4.64252	1.99742	-0.83125	hsa-miR-518e-5p/hsa-miR-519a-5p/hsa-miR-519b-5p/hsa-miR-519c-5p/hsa-miR-522-5p/hsa-miR-523-5p
11073	0.000178	3.57e-05	4.64122	1.99346	0.6918	hsa-miR-34b-5p
169189	0.000181	3.66e-05	-4.63353	1.97008	-0.72785	hsa-miR-4795-5p
46443	0.000183	3.71e-05	4.62895	1.95617	0.7757	hsa-miR-193a-5p
169336	0.000188	3.83e-05	4.61906	1.92616	1.48005	hsa-miR-17-5p
168980	0.00019	3.9e-05	4.61325	1.90852	1.42875	hsa-miR-4324
168565	0.000191	3.95e-05	-4.60982	1.89812	-0.798	hsa-miR-4649-5p
17566	0.000197	4.08e-05	4.59921	1.86593	0.54755	hsa-miR-629-3p
169083	0.000198	4.11e-05	4.59658	1.85797	0.57315	hsa-miR-371b-3p
145727	0.0002	4.18e-05	4.59157	1.84277	0.59075	hsa-miR-501-3p
148684	0.000202	4.24e-05	-4.58688	1.82857	-0.4951	hsa-miR-628-3p
17676	0.000204	4.31e-05	4.58185	1.81332	0.9885	hsa-miR-152
147603	0.000207	4.4e-05	-4.57507	1.7928	-0.3967	hsa-miR-4300
148278	0.000209	4.47e-05	4.5703	1.77836	0.6891	hsa-miR-138-2-3p
169330	0.000219	4.69e-05	4.55461	1.73094	1.7481	hsa-miR-23b-3p
169411	0.000234	5.03e-05	-4.53263	1.66453	-0.5704	hsa-miR-205-3p
169305	0.000247	5.34e-05	-4.51333	1.60635	-0.6003	hsa-miR-4455
147836	0.000261	5.71e-05	-4.49255	1.54375	-0.6608	hsv2-miR-H7-5p
169081	0.000261	5.71e-05	-4.49223	1.5428	-0.49715	hsa-miR-4707-3p
145789	0.000265	5.82e-05	4.48633	1.52504	0.4816	hsa-miR-550a-3-5p/hsa-miR-550a-5p
146178	0.000267	5.88e-05	4.48281	1.51444	0.5777	hsa-miR-502-3p
148156	0.000268	5.94e-05	-4.47976	1.50529	-0.88255	hsa-miR-3686
46467	0.000272	6.05e-05	4.47356	1.48665	1.47935	hsa-miR-143-5p
148481	0.000281	6.29e-05	-4.46138	1.45007	-0.528	hsa-miR-3646
145714	0.000288	6.51e-05	4.45063	1.41779	0.8873	hsa-miR-28-3p
145950	0.000288	6.51e-05	4.45018	1.41644	0.71415	hsa-miR-33b-5p
13179	0.000288	6.52e-05	4.44981	1.41533	0.74165	hsa-miR-455-5p
11260	0.000289	6.59e-05	4.44651	1.40543	1.0909	hsa-miR-151a-5p
145643	0.000291	6.66e-05	4.44331	1.39583	0.30055	hsa-miR-382-5p
169393	0.000293	6.75e-05	-4.43883	1.38239	-0.7725	hsa-miR-4747-5p
29190	0.000293	6.78e-05	4.4375	1.37841	1.1161	hsa-miR-708-5p
168911	0.000293	6.8e-05	-4.43665	1.37587	-0.63725	hsa-miR-4682
168638	0.000295	6.88e-05	-4.43283	1.36441	-0.8198	hsa-miR-4530
10995	0.000302	7.08e-05	4.42365	1.33692	2.15675	hsa-miR-199a-3p/hsa-miR-199b-3p
168851	0.000302	7.1e-05	-4.42265	1.33393	-0.4871	hsa-miR-4650-3p
146049	0.000302	7.13e-05	4.42122	1.32965	1.1807	hsa-miR-28-5p
168871	0.00031	7.34e-05	4.41181	1.30148	1.0133	hsa-miR-151a-5p/hsa-miR-151b
10986	0.000316	7.51e-05	4.40466	1.2801	1.2192	hsa-miR-193a-3p
169260	0.000329	7.85e-05	-4.39034	1.23733	-0.57155	hsa-miR-4436b-3p
19604	0.000338	8.12e-05	4.37939	1.20463	0.6626		SNORD4A
17508	0.000338	8.15e-05	-4.37844	1.2018	-0.38865	hcmv-miR-UL112
28302	0.000341	8.26e-05	4.37398	1.18849	0.63615		no information
46221	0.000347	8.42e-05	-4.36779	1.17004	-0.7552	hsa-miR-519d
169200	0.000355	8.66e-05	-4.35895	1.14368	-0.46135	hsa-miR-4677-5p
46309	0.000355	8.71e-05	-4.35708	1.13811	-0.5569	hsa-miR-1226-3p
168852	0.000367	9.04e-05	-4.34516	1.10263	-0.5043	hsa-miR-4764-5p
17327	0.000395	9.77e-05	-4.32001	1.02786	-0.47595	hsa-miR-630
168673	0.000398	9.92e-05	-4.31506	1.01317	-0.4121	hsa-miR-4656
168675	0.000398	9.94e-05	-4.31435	1.01105	-0.4491	hsa-miR-4433-3p
147614	0.000398	9.96e-05	-4.31374	1.00924	-0.55915	hsa-miR-4299
169272	0.000398	0.0001	-4.31245	1.00543	-0.67175	hsa-miR-4419b
46624	0.000398	0.0001	-4.31136	1.0022	-0.48245	hsa-miR-1236-3p
46415	0.0004	0.000101	-4.30823	0.9929	-0.5268	hsa-miR-548l
145845	0.0004	0.000102	4.30732	0.99021	1.6848	hsa-miR-20a-5p
168783	0.000401	0.000102	4.3048	0.98273	1.04695	hsa-miR-4770
168722	0.000401	0.000103	-4.30251	0.97596	-0.5784	hsa-miR-4742-3p
169306	0.000401	0.000103	-4.30212	0.97478	-0.34255	hsa-miR-4758-5p
168821	0.000403	0.000104	-4.29964	0.96743	-0.61765	hsa-miR-548ax
11181	0.000408	0.000106	4.29402	0.95077	1.42215	hsa-miR-95
168642	0.000417	0.000109	4.28609	0.92728	1.1205	hsa-miR-642b-3p
46483	0.000426	0.000111	4.27772	0.90251	1.82315	hsa-miR-27a-3p
168709	0.000426	0.000112	4.27626	0.89818	0.3804	hsa-miR-4429
168559	0.000435	0.000115	-4.26832	0.87469	-0.4346	hsa-miR-15a-3p
147805	0.00044	0.000116	-4.26353	0.86056	-0.2297	hsa-miR-3183
42906	0.000441	0.000117	-4.26168	0.85508	-0.3873	ebv-miR-BHRF1-1
169399	0.000443	0.000119	-4.25677	0.84056	-0.8293	hsa-miR-4750-5p
17841	0.000443	0.000119	4.25605	0.83843	0.57645		no information
169311	0.000443	0.000119	-4.25542	0.83659	-0.90945	hsa-miR-4714-5p
147830	0.000443	0.00012	4.25473	0.83454	0.62655	hsv1-miR-H18
148418	0.000445	0.000121	4.25218	0.82702	0.9629	hsa-miR-3607-5p
17445	0.000447	0.000122	-4.24931	0.81853	-0.4634	hsa-miR-610
147649	0.00045	0.000123	4.24608	0.80902	0.59685	hsa-miR-500a-5p/hsa-miR-500b
17944	0.000465	0.000127	4.23426	0.77414	0.97935	hsa-miR-337-5p
145798	0.000471	0.00013	4.22868	0.75771	0.9657	hsa-miR-142-5p
168989	0.000472	0.00013	-4.22716	0.75322	-0.29375	hsa-miR-4447
17953	0.000478	0.000132	-4.22211	0.73834	-0.56075	hsa-miR-183-3p
147735	0.000478	0.000133	4.22073	0.73429	0.9406	hsa-miR-4289
145933	0.000479	0.000134	-4.21664	0.72226	-1.0006	hsa-miR-652-5p
11063	0.000479	0.000135	-4.21653	0.72192	-0.59415	hsa-miR-330-3p
147632	0.000479	0.000135	-4.21634	0.72137	-0.3966	hsa-miR-4297
147803	0.000503	0.000142	-4.19917	0.67087	-0.79065	hsv2-miR-H10
46703	0.00051	0.000144	4.19381	0.65512	0.3563	hsa-miR-548e
11111	0.00051	0.000145	4.19267	0.65178	0.3628	hsa-miR-432-5p
169319	0.00052	0.000148	-4.18501	0.62929	-0.589	hsa-miR-3136-3p
17646	0.00052	0.000149	-4.18398	0.62627	-0.2902	ebv-miR-BHRF1-3
169238	0.000539	0.000155	-4.17113	0.5886	-0.4357	hsa-miR-4654
169307	0.000564	0.000162	-4.15524	0.54204	-0.3258	hsa-miR-4685-3p
168846	0.000608	0.000176	-4.12917	0.46583	-0.60295	hsa-miR-1273f
168567	0.000666	0.000193	-4.09814	0.3754	-0.6314	hsa-miR-3177-5p
146009	0.000666	0.000194	4.09738	0.37317	0.8956	hsa-miR-376a-3p
145943	0.000671	0.000196	4.09338	0.36155	1.7058	hsa-miR-100-5p
169091	0.000689	0.000202	-4.08385	0.33383	-0.3965	hsa-miR-5006-5p
168825	0.000699	0.000206	-4.07773	0.31605	-0.5197	hsa-miR-4729
168922	0.000715	0.000211	-4.06941	0.2919	-0.4361	hsa-miR-5584-3p
169333	0.000725	0.000215	-4.06374	0.27544	-0.3064	hsa-miR-3194-3p
42793	0.000749	0.000223	-4.05163	0.24033	-0.631		no information
169385	0.000792	0.000237	4.03194	0.18335	0.95165	hsa-miR-4500
17825	0.000792	0.000237	4.0311	0.18091	0.3172	hsa-miR-338-5p
46808	0.000792	0.000238	-4.03003	0.17784	-0.89635	hsa-miR-4485
46203	0.000798	0.000241	4.02626	0.16694	1.4573		SNORD49A
29460	0.000811	0.000245	-4.02004	0.14897	-0.3171	hsa-miR-553
147900	0.000838	0.000254	-4.0177	0.12982	-0.71183	hsv2-miR-H6-3p
168558	0.000841	0.000256	-4.00554	0.10712	-0.3878	hsa-miR-5585-3p
146044	0.000841	0.000257	4.0046	0.10441	0.3267	hsa-miR-2115-5p
17848	0.000856	0.000263	3.99709	0.08277	1.1137		no information
145651	0.000856	0.000264	3.99593	0.07942	0.9638	hsa-miR-99a-3p
17272	0.000856	0.000264	-3.99541	0.07795	-0.57905	hsa-miR-551a
11023	0.000865	0.000268	3.99098	0.06517	0.6398	hsa-miR-222-3p
145820	0.000924	0.000289	3.96623	-0.00597	0.90795	hsa-let-7c
145661	0.000924	0.000289	3.966	-0.00663	0.45		SNORD65
169390	0.000924	0.000289	-3.9655	-0.00806	-0.39055	hsa-miR-4800-5p
19591	0.000924	0.00029	3.96413	-0.01201	1.58665	hsa-miR-199b-5p
145638	0.000924	0.000291	3.96315	-0.0148	0.6334	hsa-miR-29a-5p
145663	0.000924	0.000292	3.96236	-0.01707	0.575		SNORD68
147718	0.000924	0.000293	3.96151	-0.01951	0.49845	hsv1-miR-H3-5p
17503	0.000927	0.000295	3.95917	-0.02623	0.91725	hsa-miR-590-5p
17280	0.000945	0.000301	3.95178	-0.04744	0.9519	hsa-miR-15b-5p
147595	0.000951	0.000305	3.94819	-0.0577	0.96605	hsa-miR-3178
11020	0.000951	0.000306	3.94643	-0.06277	0.5654	hsa-miR-22-3p
46921	0.000951	0.000306	-3.94632	-0.06306	-0.8885		no information
148228	0.000951	0.000307	-3.94551	-0.0654	-0.8015	hsa-miR-3656
148413	0.000957	0.00031	-3.94232	-0.07454	-0.25995	hsa-miR-3614-3p
168639	0.000972	0.000316	-3.93605	-0.09246	-0.56585	hsa-miR-4533
42630	0.000981	0.00032	3.93205	-0.10392	0.7565	hsa-miR-140-3p
168557	0.000997	0.000326	-3.9256	-0.12237	-0.3852	hsa-miR-4777-5p
169409	0.000997	0.000327	3.9246	-0.12523	0.54	hsa-miR-4286
146179	0.000997	0.000328	-3.92365	-0.12792	-0.96115	hsa-miR-2113
11078	0.00103	0.000341	3.91132	-0.16315	0.92315	hsa-miR-365a-3p/hsa-miR-365b-3p
169082	0.00105	0.000348	-3.90418	-0.18352	-1.20965	hsa-miR-1275
169313	0.00106	0.000351	-3.90136	-0.19154	-0.8536	hsa-miR-4800-3p
42640	0.00109	0.000364	3.88931	-0.22587	1.5978	hsa-miR-20b-5p
168872	0.0011	0.000368	3.88506	-0.23797	0.958	hsa-miR-24-1-5p
168908	0.00115	0.000388	-3.86771	-0.28728	-0.4449	hsa-miR-4655-5p
31867	0.00115	0.000388	3.86752	-0.28783	1.4278	hsa-miR-145-3p
145753	0.00116	0.000391	3.86551	-0.29352	0.39185	hsa-miR-484
169143	0.00116	0.000393	-3.86351	-0.29921	-0.40265	hsa-miR-4459
42681	0.00125	0.000425	3.83719	-0.37377	0.44025	hsa-miR-1307-3p
46479	0.00126	0.000429	-3.83412	-0.38247	-0.5529	hsa-miR-1304-5p
168868	0.00126	0.000431	-3.83274	-0.38638	-0.5895	hsa-miR-5681b
168897	0.00126	0.000431	-3.83265	-0.38663	-0.35665	hsa-miR-5187-5p
147790	0.00126	0.000432	-3.83166	-0.38941	-0.89315	hsv2-miR-H7-3p
42478	0.00127	0.000438	3.82756	-0.40102	0.5028	hsa-miR-593-5p
168795	0.00127	0.000438	-3.82698	-0.40266	-0.29475	hsa-miR-4706
10138	0.00127	0.000441	3.82481	-0.40877	1.51825	hsa-miR-130a-3p
168687	0.0013	0.000452	3.81683	-0.43133	0.8919	hsa-miR-29a-3p
169204	0.00131	0.000457	-3.81263	-0.44316	-0.59535	hsa-miR-4709-3p
145968	0.00131	0.000458	3.81203	-0.44486	1.1829	hsa-let-7d-5p
46507	0.00133	0.000466	-3.80629	-0.46105	-0.36935	hsa-miR-921
11018	0.00138	0.000484	3.79375	-0.49636	1.1708	hsa-miR-218-5p
32884	0.00139	0.00049	3.78965	-0.50789	1.0393	hsa-miR-342-3p
147919	0.00139	0.000494	-3.78683	-0.51582	-1.00195	kshv-miR-K12-12-3p
168972	0.00139	0.000494	-3.78656	-0.51658	-0.5931	hsa-miR-5004-3p
148430	0.00144	0.000512	3.77463	-0.5501	1.20905	hsa-miR-374c-5p
10928	0.00144	0.000515	3.77289	-0.55498	0.8747	hsa-miR-125a-5p
148657	0.00146	0.000521	-3.76857	-0.5671	-0.4286	hsa-miR-381-5p
42732	0.00146	0.000525	3.76629	-0.57352	0.3931	hsa-miR-532-3p
169057	0.00146	0.000525	3.76592	-0.57455	0.3078	hsa-miR-4659b-3p
42730	0.0015	0.000544	3.75431	-0.60707	0.43525	hsa-miR-423-3p
11182	0.0015	0.000544	3.75393	-0.60813	1.3647	hsa-miR-98-5p
168899	0.00156	0.000565	-3.74161	-0.64261	-0.4009	hsa-miR-1285-5p
42932	0.00159	0.000582	-3.73126	-0.67154	-0.4884	hsa-miR-920
169145	0.00159	0.000583	3.73104	-0.67216	0.70435	hsa-miR-5000-3p
146010	0.00159	0.000583	-3.73048	-0.67373	-0.45955	hsa-miR-2116-5p
17338	0.00161	0.000593	3.7252	-0.68844	0.81705	hsa-miR-660-5p
169021	0.00164	0.000606	-3.7179	-0.7088	-0.30865	hsa-miR-4646-5p
169206	0.00165	0.00061	-3.71552	-0.71544	-0.26215	hsa-miR-4645-3p
27545	0.00167	0.000619	3.71048	-0.72948	0.5341	hsa-miR-373-5p
147334	0.00168	0.000625	3.70738	-0.73812	0.9531	hsa-miR-3613-5p
146024	0.00172	0.000641	-3.69862	-0.76248	-0.244	hsa-miR-383
169087	0.00172	0.000642	-3.69828	-0.76344	-0.55475	hsa-miR-149-3p
17460	0.00173	0.000648	-3.69494	-0.77272	-0.2539	hsa-miR-657
42490	0.00174	0.000652	-3.69264	-0.7791	-0.2654	hsa-miR-505-5p
42641	0.00175	0.000659	3.68939	-0.78814	1.483	hsa-miR-145-5p
42869	0.00177	0.000669	-3.68419	-0.80257	-0.32685	hsa-miR-936
169213	0.00177	0.000669	-3.68406	-0.80293	-0.3289	hsa-miR-4768-3p
10997	0.00178	0.000676	3.68035	-0.81321	1.0951	hsa-miR-19a-3p
147165	0.00195	0.000743	3.6481	-0.90249	0.6839	hsa-let-7b-5p
169166	0.00196	0.000747	-3.64632	-0.90741	-0.4294	hsa-miR-4683
168668	0.00198	0.000758	-3.64156	-0.92052	-0.74605	hsa-miR-4732-3p
46345	0.00203	0.000777	-3.63288	-0.94447	-0.57085	hsa-miR-1207-3p
168967	0.00204	0.000785	-3.62947	-0.95386	-0.2983	hsa-miR-4476
148098	0.00206	0.000794	3.62567	-0.96433	1.00765	hsa-miR-374b-5p
169285	0.00207	0.000802	-3.62199	-0.97447	-0.66275	hsa-miR-4467
169212	0.00214	0.000832	-3.60966	-1.00835	-0.30275	hsa-miR-514a-5p
46791	0.00219	0.000853	-3.60093	-1.03233	-0.3161	hsa-miR-1204
46732	0.00221	0.000861	3.59761	-1.04143	0.3656	hsa-miR-1264
169059	0.00222	0.000867	3.59545	-1.04734	0.56745	hsa-miR-642a-3p
18739	0.00226	0.000885	3.58824	-1.06709	0.4986	hsa-miR-186-5p
145675	0.00234	0.000918	-3.57549	-1.102	-0.9702	hsa-miR-501-5p
146090	0.00236	0.00093	-3.57124	-1.11362	-0.8747	hsv1-miR-H7-3p
42845	0.00239	0.000945	3.56559	-1.12904	0.2324	hsa-miR-125b-2-3p
169232	0.00251	0.000992	3.5488	-1.17482	0.32855	hsa-miR-3156-3p
168968	0.00262	0.00104	-3.53217	-1.22006	-0.37495	hsa-miR-147b
168986	0.0027	0.00107	-3.52158	-1.24878	-0.4573	hsa-miR-4677-3p
147885	0.00276	0.0011	-3.51335	-1.27109	-0.4092	kshv-miR-K12-5-5p
42708	0.00277	0.00111	3.51104	-1.27734	1.60425	hsa-miR-99a-5p
42476	0.00278	0.00112	3.5083	-1.28477	0.2033	hsa-miR-374b-3p
146142	0.00278	0.00112	-3.50805	-1.28545	-0.24115	hsa-miR-1972
147535	0.00284	0.00114	-3.4992	-1.30938	-0.37855	hsa-miR-4309
169381	0.00284	0.00115	-3.49846	-1.3114	-0.4409	hsa-miR-4421
168870	0.00287	0.00116	-3.49391	-1.32369	-0.70585	hsa-miR-1246
168586	0.00293	0.00119	3.48562	-1.34606	0.9916	hsa-miR-34a-5p
19585	0.00294	0.0012	3.48313	-1.35277	0.5569	hsa-miR-148b-3p
28966	0.003	0.00123	3.47556	-1.37318	0.3332	hsa-miR-574-3p
42808	0.003	0.00123	3.47441	-1.37627	0.622	hsa-miR-874
42591	0.003	0.00123	-3.47362	-1.37841	-0.3269	hsa-miR-634
145736	0.00301	0.00124	-3.47199	-1.3828	-0.3528	hsa-miR-605
169045	0.00303	0.00125	-3.46924	-1.39021	-0.6112	hsa-miR-4651
168857	0.00303	0.00125	-3.46746	-1.39497	-0.2876	hsa-miR-2392
168964	0.00303	0.00125	-3.46736	-1.39526	-0.39165	hsa-miR-4450
147771	0.00308	0.00128	3.4606	-1.41342	1.45485	hsa-miR-4328
42780	0.00318	0.00133	3.44813	-1.44691	0.38135	hsa-miR-1307-5p
169031	0.00324	0.00135	-3.44095	-1.46614	-0.40625	hsa-miR-4726-5p
17752	0.00325	0.00136	3.43878	-1.47196	1.47695	hsa-let-7f-5p
10998	0.00329	0.00138	3.43412	-1.48443	0.8264	hsa-miR-19b-3p
169316	0.00337	0.00142	-3.42433	-1.51063	-0.43755	hsa-miR-3976
168898	0.00344	0.00145	-3.41667	-1.53107	-0.49505	hsa-miR-5008-3p
46866	0.0035	0.00148	-3.40976	-1.5495	-0.2918	hsa-miR-1321
169016	0.0035	0.00148	-3.40913	-1.55118	-0.2749	hsa-miR-4743-5p
169079	0.00352	0.00149	-3.40627	-1.5588	-0.46045	hsa-miR-4667-5p
42674	0.00357	0.00152	3.40046	-1.57428	0.64895	hsa-miR-431-3p
147817	0.00373	0.00159	-3.38419	-1.61753	-0.74645	hsa-miR-3196
17328	0.00385	0.00165	-3.37163	-1.65083	-0.6444	ebv-miR-BART8-3p
46402	0.00395	0.00169	-3.36221	-1.67578	-0.26635	hsa-miR-1255b-5p
29575	0.00403	0.00173	-3.35414	-1.6971	-0.42815	hsa-miR-32-3p
169308	0.00406	0.00175	-3.35065	-1.70634	-0.3453	hsa-miR-4503
42629	0.00407	0.00176	3.34906	-1.71051	0.7105	hsa-miR-376c-3p
168946	0.00419	0.00182	-3.3373	-1.74152	-0.23045	hsa-miR-4673
148668	0.00428	0.00186	-3.32936	-1.76244	-0.48925	hsa-miR-378a-3p
148599	0.00434	0.00189	-3.32379	-1.77707	-0.6212	hsa-miR-3680-5p
42502	0.00435	0.0019	-3.32146	-1.7832	-0.4398	hsa-miR-204-3p
19603	0.00436	0.00191	3.31984	-1.78747	0.6639		SNORD13
148052	0.00439	0.00192	3.31668	-1.79576	0.25125	hsa-miR-374c-3p
169024	0.00444	0.00195	-3.31191	-1.80828	-0.63825	hsa-miR-3960
17935	0.00447	0.00197	3.30899	-1.81593	0.7504	hsa-miR-101-5p
147925	0.00452	0.002	-3.30371	-1.82977	-0.2852	hsa-miR-3126-5p
42874	0.00457	0.00202	3.29936	-1.84115	0.23725	hsa-miR-16-2-3p
21498	0.00461	0.00204	3.29534	-1.85167	0.4118	hsa-miR-654-3p
169218	0.00461	0.00205	-3.2946	-1.85361	-0.3045	hsa-miR-5189
169227	0.00463	0.00206	-3.2925	-1.85909	-0.25495	hsa-miR-3064-5p
42839	0.00467	0.00208	3.28863	-1.86922	0.96785	hsa-miR-135a-5p
148057	0.00477	0.00213	3.27959	-1.8928	0.2017	hsa-miR-186-3p
169018	0.00478	0.00214	-3.27795	-1.89708	-0.18245	hsa-miR-4640-5p
42509	0.00481	0.00216	3.27494	-1.90493	0.33515	hsa-miR-219-5p
169389	0.00483	0.00217	3.2732	-1.90946	0.3213	hsa-miR-4717-3p
42683	0.00484	0.00218	3.27144	-1.91403	0.19615	hsa-miR-922
148379	0.00495	0.00224	3.26256	-1.93716	0.3125	hsa-miR-3654
42538	0.00497	0.00225	3.26033	-1.94296	0.2829	hsa-miR-196a-3p
147926	0.00499	0.00227	3.25806	-1.94885	0.2693	hsa-miR-4329
148666	0.005	0.00228	-3.2561	-1.95394	-0.2497	hsa-miR-938
27720	0.005	0.00228	3.25565	-1.95512	1.10745	hsa-miR-15a-5p
42750	0.00518	0.00237	3.24246	-1.98934	0.2347	hsa-miR-636
46623	0.00522	0.00239	-3.23852	-1.99955	-0.31145	hsa-miR-1273a
146068	0.00535	0.00246	3.22852	-2.0254	0.4935	hsa-miR-1915-3p
146163	0.00535	0.00246	-3.2284	-2.02573	-0.35685	hsa-miR-224-3p
145975	0.0055	0.00254	3.21729	-2.05441	0.28745		no information
14272	0.00551	0.00255	3.21618	-2.05726	0.39745	hsa-miR-542-3p
17493	0.00554	0.00257	-3.21322	-2.06491	-0.39885	hsa-miR-622
147604	0.00555	0.00258	-3.21164	-2.06896	-0.6635	hsa-miR-4285
147935	0.00558	0.0026	-3.20901	-2.07574	-0.18715	hsa-miR-3125
17532	0.00567	0.00264	-3.20255	-2.09238	-0.53935	ebv-miR-BART5-5p
10947	0.00568	0.00266	3.20095	-2.09648	1.5088	hsa-miR-142-3p
42702	0.00571	0.00268	-3.19836	-2.10316	-0.67105	hsa-miR-30c-1-3p
10916	0.00572	0.00269	3.19657	-2.10774	1.6699	hsa-miR-1
168704	0.00576	0.00271	-3.19377	-2.11493	-0.3076	hsa-miR-506-5p
168844	0.00581	0.00274	-3.18981	-2.12511	-0.40495	hsa-miR-4532
17893	0.00583	0.00276	3.18748	-2.13109	0.69495	hsa-miR-362-3p
4700	0.00585	0.00277	3.18529	-2.1367	1.25455	hsa-miR-140-5p
33596	0.00597	0.00283	3.17765	-2.15627	1.35535	hsa-miR-126-5p
148265	0.00605	0.00288	-3.17159	-2.17178	-0.3184	hsa-miR-3935
168690	0.00616	0.00294	-3.16426	-2.19052	-0.57645	hsa-miR-4466
42783	0.00628	0.003	3.15667	-2.20989	0.271	hsa-miR-197-3p
169183	0.00629	0.00301	-3.15525	-2.21351	-0.4183	hsa-miR-4644
169245	0.00658	0.00316	-3.13817	-2.25698	-0.30095	hsa-miR-2467-3p
145962	0.00684	0.0033	-3.12246	-2.29686	-0.3832	hsa-miR-639
46918	0.00684	0.0033	-3.12219	-2.29753	-1.06525	hsa-miR-375
148641	0.00703	0.0034	-3.11144	-2.32475	-0.19185	hsa-miR-518b
146137	0.0071	0.00344	3.10697	-2.33605	1.0509	hsa-miR-133a
42847	0.00721	0.0035	3.10092	-2.3513	0.97955	hsa-miR-497-5p
147203	0.0073	0.00355	-3.09546	-2.36508	-0.40565	hsa-miR-302a-3p
42824	0.00742	0.00362	-3.08851	-2.38259	-0.38955	ebv-miR-BART9-5p
168955	0.00774	0.00378	-3.07222	-2.42353	-0.27915	hsa-miR-4756-3p
148495	0.00782	0.00383	-3.06762	-2.43505	-0.37215	hsa-miR-3915
169264	0.00819	0.00402	-3.0494	-2.48064	-0.4411	hsa-miR-4762-5p
169244	0.00819	0.00403	-3.0489	-2.48188	-0.58625	hsa-miR-5572
168619	0.0082	0.00404	3.04779	-2.48466	0.3609	hsa-miR-1260b
4610	0.00826	0.00407	3.04461	-2.49259	1.51835	hsa-miR-126-3p
169171	0.00834	0.00413	-3.03943	-2.5055	-0.70585	hsa-miR-4436b-5p
169028	0.00834	0.00413	-3.03923	-2.50599	-0.5776	hsa-miR-4708-3p
145745	0.00836	0.00415	-3.03772	-2.50977	-0.36905	hsa-miR-335-3p
169185	0.00837	0.00416	-3.03662	-2.51252	-0.39045	hsa-miR-5187-3p
147823	0.00838	0.00418	-3.03503	-2.51646	-0.2559	hsa-miR-3146
148687	0.00851	0.00425	-3.02867	-2.53229	-0.6261	hsa-miR-1908
11074	0.00856	0.00429	3.02576	-2.53951	0.2188	hsa-miR-34c-5p
168948	0.00879	0.00441	-3.01505	-2.56612	-0.2577	hsa-miR-4514
168724	0.00879	0.00443	-3.01381	-2.56919	-0.3165	hsa-miR-4529-3p
168672	0.00879	0.00443	-3.01353	-2.56989	-0.45415	hsa-miR-1587
168703	0.00891	0.00449	-3.00801	-2.58355	-0.32875	hsa-miR-4716-3p
27544	0.009	0.00455	3.00319	-2.59549	0.62665	hsa-miR-363-5p
42666	0.00901	0.00456	3.00229	-2.59772	0.37915	hsa-miR-26a-2-3p
11052	0.00907	0.00461	-2.99883	-2.60625	-0.827	hsa-miR-31-5p
145844	0.0091	0.00463	2.99697	-2.61085	1.3449	hsa-miR-374a-5p
17942	0.00914	0.00466	-2.99457	-2.61679	-0.22675	hsa-miR-125a-3p
147806	0.00918	0.00469	-2.99207	-2.62296	-0.35545	hsa-miR-3149
145701	0.00936	0.00479	2.98424	-2.64226	0.40305	hsa-miR-668
169395	0.00942	0.00483	-2.98115	-2.64987	-0.59075	hsa-miR-4484
169214	0.00958	0.00492	2.97385	-2.66783	0.44875	hsa-miR-4638-5p
168727	0.00958	0.00493	-2.97317	-2.66949	-0.32775	hsa-miR-4426
10943	0.00989	0.0051	2.96049	-2.70061	0.68985	hsa-miR-136-5p
42514	0.0102	0.0053	-2.94639	-2.73512	-0.49275	hsa-miR-937-3p
148363	0.0105	0.00542	-2.93794	-2.75575	-0.23335	hsa-miR-3652
46640	0.0106	0.00548	-2.93357	-2.76641	-0.30195	hsa-miR-1257
46438	0.0107	0.00554	2.92959	-2.77609	1.16625	hsa-let-7g-5p
168763	0.0107	0.00555	2.92876	-2.77812	0.42735	hsa-miR-3676-5p
147415	0.0108	0.00565	-2.92199	-2.7946	-0.2596	hsa-miR-495-5p
146046	0.0109	0.00568	-2.92001	-2.7994	-0.2122	jcv-miR-J1-5p
42592	0.0109	0.00571	2.91805	-2.80415	0.93015	hsa-miR-338-3p
11053	0.0112	0.00589	2.90669	-2.83171	1.01255	hsa-miR-32-5p
147162	0.0112	0.00589	2.9063	-2.83266	1.48995	hsa-let-7a-5p
145833	0.0112	0.00591	-2.90531	-2.83504	-0.37645	hsa-miR-596
146185	0.0114	0.00604	-2.89684	-2.85553	-0.1868	bkv-miR-B1-5p
147904	0.0115	0.00608	-2.89421	-2.86189	-0.3261	hsa-miR-3148
42676	0.0117	0.00618	2.88801	-2.87685	0.47065	hsa-miR-495-3p
17567	0.0117	0.0062	-2.88719	-2.87884	-0.2389	kshv-miR-K12-1-5p
13177	0.012	0.00639	2.87531	-2.90745	1.4245	hsa-miR-143-3p
168944	0.0121	0.00648	-2.87021	-2.9197	-0.5011	hsa-miR-4707-5p
17853	0.0122	0.00652	2.86783	-2.92541	0.281	hsa-miR-30d-3p
169228	0.0122	0.00654	-2.86681	-2.92788	-0.43065	hsa-miR-4698
11084	0.0123	0.00659	-2.86369	-2.93535	-0.3412	hsa-miR-372
168976	0.0124	0.00669	-2.85813	-2.94868	-0.15875	hsa-miR-3135b
27672	0.0125	0.00675	-2.85436	-2.95771	-0.281	hsa-miR-615-3p
145981	0.0126	0.00682	-2.8505	-2.96695	-0.2884	hsa-miR-1285-3p
146160	0.013	0.00704	2.83848	-2.99565	0.88085	hsa-miR-133b
46924	0.013	0.00705	-2.83793	-2.99696	-0.21945	hsa-miR-1252
145859	0.013	0.00706	2.83726	-2.99855	0.7427	hsa-miR-33a-5p
168943	0.0138	0.00748	-2.81537	-3.05062	-0.2089	hsa-miR-4769-3p
169123	0.0138	0.00752	-2.81302	-3.0562	-0.30535	hsa-miR-3184-3p
168953	0.0139	0.00758	-2.81015	-3.06298	-0.18815	hsa-miR-4704-5p
169155	0.0139	0.0076	-2.80922	-3.06519	-0.2708	hsa-miR-4480
168958	0.0139	0.00763	2.80773	-3.06872	0.39835	hsa-miR-2681-5p
147941	0.014	0.00767	-2.80546	-3.07408	-0.34265	hsa-miR-3160-3p
17561	0.014	0.00767	-2.80545	-3.0741	-0.9583	ebv-miR-BART6-3p
168683	0.014	0.00771	-2.80367	-3.07833	-0.33675	hsa-miR-4792
4040	0.0141	0.00778	2.80001	-3.08699	0.5892	hsa-miR-9-5p
169050	0.0145	0.00803	-2.7875	-3.1165	-0.49925	hsa-miR-4787-5p
46427	0.0148	0.00822	2.77888	-3.13679	0.61545	hsa-miR-1248
148068	0.0152	0.00844	-2.76855	-3.16104	-0.23525		no information
169271	0.0152	0.00845	-2.76819	-3.16189	-0.2892	hsa-miR-4784
46789	0.0156	0.00867	-2.758	-3.18575	-0.5373	hsa-miR-513b
148465	0.016	0.00893	-2.74647	-3.21269	-0.37465	hsa-miR-3611
148335	0.0164	0.00919	-2.73535	-3.23857	-0.22025	hsa-miR-3606-5p
147988	0.0167	0.00933	-2.7295	-3.25219	-0.3518	hsa-miR-3135a
147530	0.017	0.00953	-2.72112	-3.27162	-0.2964	hsa-miR-378b
46215	0.0172	0.00969	2.71456	-3.28681	0.2714	hsa-miR-1301
168572	0.0174	0.00978	-2.71086	-3.29536	-0.3965	hsa-miR-4507
146103	0.0177	0.00999	2.70245	-3.31478	0.28625	hsa-miR-1913
27536	0.0178	0.0101	2.69974	-3.32104	0.80205	hsa-miR-190a
169056	0.0182	0.0103	-2.68997	-3.34352	-0.18705	hsa-miR-4669
168769	0.0183	0.0104	-2.68639	-3.35175	-0.1942	hsa-miR-5002-5p
169129	0.0184	0.0105	2.68446	-3.35618	1.34255	hsa-miR-4284
42533	0.0188	0.0107	-2.67479	-3.37837	-0.27535	hiv1-miR-H1
148285	0.0188	0.0107	2.67449	-3.37904	0.45865	hsa-miR-3941
148064	0.0194	0.0111	-2.66234	-3.40684	-0.21215	hsa-miR-3926
168917	0.0195	0.0111	-2.65945	-3.41342	-0.91135	hsa-miR-4511
147884	0.0196	0.0112	-2.65691	-3.41923	-0.5567	hsv2-miR-H25
46944	0.0196	0.0113	2.65503	-3.42351	1.10515	hsa-miR-1297
46880	0.0198	0.0114	-2.65101	-3.43266	-0.18805	hsa-miR-1183
42656	0.0201	0.0116	2.64372	-3.44923	0.29075	kshv-miR-K12-10a-3p
169169	0.0202	0.0117	2.64061	-3.45629	0.29695	hsa-miR-5684
11005	0.0204	0.0118	-2.63596	-3.46685	-0.443	hsa-miR-204-5p
147198	0.021	0.0122	2.62409	-3.49371	0.8428	hsa-miR-26a-5p
11151	0.0213	0.0123	-2.61858	-3.50615	-0.20345	hsa-miR-516b-5p
147706	0.0214	0.0124	-2.616	-3.51197	-0.17795	hsa-miR-4255
147986	0.0215	0.0126	2.61186	-3.52129	0.28585		no information
11277	0.0223	0.013	2.59656	-3.55568	0.21495	hsa-miR-7-1-3p
169236	0.0223	0.0131	-2.59612	-3.55667	-0.31995	hsa-miR-659-5p
168836	0.0224	0.0131	-2.59345	-3.56266	-0.2604	hsa-miR-4496
169106	0.0225	0.0132	2.59109	-3.56796	0.40985	hsa-miR-4783-3p
169026	0.023	0.0135	-2.58262	-3.58689	-0.3702	hsa-miR-4679
146091	0.0231	0.0136	2.57921	-3.59452	0.3162	hsa-miR-1914-5p
169152	0.0231	0.0136	-2.5791	-3.59475	-0.4124	hsa-miR-5690
168919	0.0233	0.0138	2.57447	-3.60508	0.3798	hsa-miR-4456
168893	0.0233	0.0138	-2.57442	-3.60521	-0.38485	hsa-miR-4505
148172	0.0233	0.0138	-2.57355	-3.60714	-0.17665		no information
145677	0.0237	0.0141	2.56521	-3.62571	0.5987	hsa-miR-139-5p
169270	0.0241	0.0144	-2.55772	-3.64234	-0.83405	hsa-miR-4458
42581	0.0247	0.0147	-2.54748	-3.66504	-0.5708	hsa-miR-513a-5p
46404	0.0247	0.0147	2.5471	-3.66586	0.33535	hsa-miR-1244
168863	0.0249	0.0149	-2.54309	-3.67474	-0.2566	hsa-miR-4441
17875	0.0253	0.0151	2.53626	-3.68982	0.2422	hsa-miR-500a-5p
13148	0.0253	0.0152	2.53517	-3.69222	1.2995	hsa-miR-195-5p
169154	0.0276	0.0166	-2.49915	-3.77124	-0.1655	hsa-miR-4803
168597	0.0282	0.017	-2.489	-3.79334	-0.22225	hsa-miR-5699
169296	0.0286	0.0172	-2.483	-3.80639	-0.20195	hsa-miR-5004-5p
147916	0.0286	0.0173	-2.48217	-3.80818	-0.43365	hsa-miR-3126-3p
168809	0.029	0.0175	-2.47599	-3.8216	-0.16935	hsa-miR-5698
148361	0.0293	0.0178	-2.47097	-3.83247	-0.13775	hsa-miR-3911
11104	0.0296	0.018	-2.46548	-3.84433	-0.64225	hsa-miR-422a
146069	0.0308	0.0188	-2.4483	-3.88136	-0.176	hsa-miR-1915-5p
169116	0.0312	0.019	-2.44277	-3.89324	-0.55375	hsa-miR-4788
10306	0.0314	0.0192	2.43874	-3.90187	0.6471	hsa-miR-146b-5p
168814	0.0317	0.0194	2.43404	-3.91194	0.3867	hsa-miR-4463
169096	0.0319	0.0195	-2.43118	-3.91805	-0.23695	hsa-miR-4804-3p
169149	0.0324	0.0199	-2.42391	-3.93359	-0.5124	hsa-miR-4659b-5p
168861	0.0324	0.0199	-2.42296	-3.9356	-0.3105	hsa-miR-4754
169110	0.0324	0.0199	2.42292	-3.93569	0.46905	hsa-miR-4497
146165	0.0328	0.0202	-2.41748	-3.94728	-0.59195	hsa-miR-1973
147715	0.0332	0.0205	-2.41084	-3.96141	-0.1837	hsa-miR-4251
168661	0.0333	0.0206	-2.40963	-3.96399	-0.29625	hsa-miR-4531
169416	0.0343	0.0213	2.39595	-3.99297	0.54685		no information
42609	0.0345	0.0214	-2.39296	-3.9993	-0.161	hsa-miR-135a-3p
13147	0.0367	0.0228	2.3663	-4.05541	0.55865	hsa-miR-96-5p
168736	0.0381	0.0237	-2.34919	-4.09115	-0.19625	hsa-miR-4796-3p
146008	0.0384	0.024	2.3453	-4.09925	1.16125	hsa-miR-26b-5p
10967	0.0385	0.024	2.34411	-4.10174	1.19915	hsa-miR-16-5p
27551	0.0385	0.0241	2.34369	-4.10261	0.30595	hsa-miR-612
145905	0.0385	0.0242	-2.34202	-4.10608	-0.2545	hsa-miR-518a-5p/hsa-miR-527
17626	0.0385	0.0242	-2.34152	-4.10713	-0.1823	hsa-miR-575
169167	0.0388	0.0244	-2.33747	-4.11553	-0.21235	hsa-miR-4451
42950	0.0389	0.0245	2.3362	-4.11817	0.3806	hsa-miR-24-2-5p
147584	0.0389	0.0245	-2.3352	-4.12024	-0.3482	hsa-miR-548t-5p
168998	0.0403	0.0255	-2.31913	-4.1535	-0.3525	hsa-miR-4508
29872	0.0404	0.0256	-2.31752	-4.15681	-0.16725	hsa-miR-340-5p
145973	0.0404	0.0256	-2.31667	-4.15857	-0.1458	hsa-miR-664a-3p
27565	0.0406	0.0258	-2.31379	-4.1645	-0.2857	hsa-miR-423-5p
42969	0.0411	0.0261	2.30818	-4.17604	0.2158	hsa-miR-10b-3p
46705	0.0417	0.0265	-2.30175	-4.18925	-0.3408	hsa-miR-548k
168978	0.0419	0.0267	-2.29857	-4.19577	-0.49525	hsa-miR-371b-5p
147554	0.0419	0.0267	-2.29846	-4.19599	-0.2149	hsa-miR-4273
147832	0.0424	0.0272	-2.29175	-4.20975	-0.15515	hsa-miR-4326
169329	0.0425	0.0272	-2.29047	-4.21237	-0.1994	hsa-miR-370
11045	0.0428	0.0275	-2.28666	-4.22013	-0.17405	hsa-miR-302c-5p
148639	0.0439	0.0282	-2.27505	-4.2438	-0.1435	hsa-miR-4298
31026	0.0465	0.0299	2.24982	-4.29489	0.91025	hsa-miR-101-3p
17546	0.0469	0.0303	-2.24482	-4.30495	-0.39315	hsa-miR-585
28047	0.0476	0.0308	-2.23743	-4.31981	-0.1355	hsa-miR-890
168896	0.0476	0.0308	-2.23696	-4.32076	-0.41845	hsa-miR-548ao-3p
148652	0.0484	0.0313	-2.22976	-4.33517	-0.1925	hsa-miR-620
42838	0.0484	0.0314	2.22868	-4.33735	0.1847		no information
10964	0.0486	0.0316	-2.22599	-4.34273	-0.4693	hsa-miR-155-5p
10975	0.0499	0.0325	2.2142	-4.36624	0.5349	hsa-miR-182-5p
148234	0.0502	0.0327	-2.21089	-4.37284	-0.3118	hsa-miR-3667-5p
27740	0.0502	0.0328	-2.21007	-4.37447	-0.1912	hsa-miR-574-5p
169226	0.0527	0.0345	-2.18776	-4.41864	-0.2147	hsa-miR-4419a
168971	0.0537	0.0352	-2.17916	-4.43558	-0.72135	hsa-miR-4449
11164	0.0542	0.0356	2.17397	-4.44577	0.21375	hsa-miR-519e-3p
42749	0.0564	0.0371	-2.15555	-4.48181	-0.39875	hsa-miR-659-3p
169040	0.0588	0.0387	-2.13625	-4.51931	-0.19875	hsa-miR-4753-5p
146074	0.0594	0.0392	-2.13113	-4.5292	-0.11115	hsa-miR-2114-5p
169417	0.0609	0.0402	-2.11922	-4.55216	-0.16495	hsa-miR-551b-5p
148216	0.0609	0.0403	2.11811	-4.55429	0.16065	hsa-miR-3907
17391	0.0611	0.0405	-2.11617	-4.55803	-0.14095	hsa-miR-635
169388	0.0615	0.0408	-2.11239	-4.56529	-0.41785	hsa-miR-663a
42782	0.0619	0.0411	-2.10891	-4.57195	-0.3917	hcmv-miR-UL148D
169043	0.0628	0.0418	-2.10153	-4.58608	-0.32445	hsa-miR-4462
42673	0.0689	0.0459	2.05927	-4.66617	0.22725	hsa-miR-337-3p
146115	0.0693	0.0463	2.05554	-4.67316	0.2441	hsa-miR-940
147874	0.0711	0.0476	-2.0431	-4.69645	-0.198	hsa-miR-544b
42523	0.0711	0.0476	2.04228	-4.69799	0.2368	hsa-miR-26b-3p
17613	0.0717	0.0482	-2.03731	-4.70725	-0.12135	hsa-miR-645
147664	0.0717	0.0482	-2.03702	-4.70781	-0.13035	hsa-miR-4311
42528	0.0718	0.0483	-2.03569	-4.71027	-0.15795	hsa-miR-296-3p
46380	0.0731	0.0493	-2.02658	-4.72721	-0.25805	hsa-miR-1255a
148086	0.0749	0.0506	2.01465	-4.74929	0.3033	hsa-miR-548aa/hsa-miR-548t-3p
169367	0.0751	0.0508	-2.01303	-4.75228	-0.25895	hsa-miR-4444
169341	0.0768	0.052	-2.00175	-4.77304	-0.30795	hsa-miR-4632-3p
42571	0.077	0.0522	2.0002	-4.77588	0.37155	hsa-miR-129-1-3p
148577	0.0772	0.0524	1.998	-4.77993	0.2656	hsa-miR-3943
168598	0.0796	0.0541	1.98295	-4.80744	0.3395	hsa-miR-5007-3p
17820	0.0821	0.0559	-1.96789	-4.83481	-0.17465		no information
17810	0.083	0.0566	1.96184	-4.84576	0.1966	hsa-miR-29b-1-5p
46707	0.0833	0.0569	-1.95985	-4.84935	-0.16175	hsa-miR-1253
145676	0.0835	0.0572	1.95764	-4.85333	0.55975	hsa-miR-30e-3p
46210	0.0839	0.0574	1.9552	-4.85772	0.2154	hsa-miR-1249
148077	0.0844	0.0579	1.9513	-4.86475	0.1567	hsa-miR-3690
169322	0.0853	0.0586	-1.94597	-4.87433	-0.38675	hsa-miR-4534
148214	0.0855	0.0589	-1.94382	-4.87819	-0.2201	hsa-miR-3675-3p
146112	0.086	0.0593	1.94041	-4.88429	0.7492	hsa-miR-30b-5p
19596	0.0875	0.0604	1.93131	-4.90055	0.41035	hsa-miR-30d-5p
168796	0.0877	0.0606	-1.92981	-4.90323	-0.1361	hsa-miR-3664-3p
147667	0.0881	0.061	1.9271	-4.90805	0.5744	hsa-miR-3182
168959	0.0884	0.0614	-1.92387	-4.91379	-0.1976	hsa-miR-4778-5p
169239	0.0884	0.0614	-1.92371	-4.91409	-0.41355	hsa-miR-4732-5p
42965	0.0891	0.062	1.91939	-4.92175	0.5543	hsa-miR-424-5p
168815	0.0943	0.0657	-1.89125	-4.97138	-0.30745	hsa-miR-4488
168696	0.0943	0.0657	-1.8911	-4.97164	-0.19265	hsa-miR-4739
169383	0.0949	0.0663	1.88693	-4.97893	0.1701	hsa-miR-548ah-5p
19595	0.0955	0.0668	1.88356	-4.98483	0.44205	hsa-miR-30a-3p
147701	0.0959	0.0672	-1.88074	-4.98975	-0.3693	hsa-miR-491-3p
148317	0.0961	0.0674	-1.87906	-4.99267	-0.37935	hsa-miR-3621
147671	0.0986	0.0693	1.86595	-5.01546	0.1234	hsa-miR-4323
32946	0.0987	0.0696	-1.86354	-5.01964	-0.1763	hsa-miR-486-5p
17349	0.0987	0.0696	-1.86343	-5.01983	-0.13655	hsa-miR-595
17958	0.0987	0.0696	-1.86343	-5.01984	-0.1604	hsa-miR-576-3p
17854	0.1	0.0707	1.85605	-5.03259	0.1945	hsa-miR-106b-3p
29852	0.101	0.0718	1.84845	-5.04566	0.2334	hsa-miR-9-3p
145716	0.102	0.0726	1.84327	-5.05456	0.12915	hsa-miR-671-5p
46222	0.104	0.0736	-1.83645	-5.06624	-0.1737	hsa-miR-1228-5p
28019	0.105	0.0747	1.8295	-5.0781	0.1792	hsa-miR-10a-3p
145857	0.107	0.076	1.82048	-5.09344	0.1996	hsa-miR-154-5p
148059	0.107	0.0762	1.81957	-5.095	0.24005	hsa-miR-493-5p
148032	0.11	0.0783	-1.80586	-5.11817	-0.31145	hsa-miR-3685
169102	0.111	0.0794	-1.79912	-5.12952	-0.2122	hsa-miR-4639-3p
169406	0.113	0.0807	1.79134	-5.14257	0.20085	hsa-miR-376b-3p
46788	0.114	0.0814	-1.78697	-5.14987	-0.1757	hsa-miR-1299
145972	0.117	0.0844	1.76917	-5.17949	0.23385	hsa-miR-141-5p
168933	0.119	0.0854	1.76324	-5.1893	0.2354	hsa-miR-5581-3p
145984	0.119	0.0859	-1.7602	-5.1943	-0.1463	ebv-miR-BART2-3p
29490	0.119	0.0861	1.75891	-5.19643	0.3633	hsa-miR-7-5p
148524	0.12	0.0864	-1.75693	-5.1997	-0.1349	hsa-miR-3914
168640	0.124	0.0898	-1.73786	-5.23094	-0.2914	hsa-miR-4475
148206	0.129	0.0932	1.7193	-5.26109	0.107	hsa-miR-3664-5p
169199	0.131	0.0953	1.70795	-5.27937	0.23725	hsa-miR-4518
42795	0.135	0.0978	-1.69437	-5.30113	-0.27245	kshv-miR-K12-3-5p
169064	0.135	0.0985	-1.69086	-5.30672	-0.14245	hsa-miR-4778-3p
145977	0.137	0.1	1.68317	-5.31895	0.29545	hsa-miR-1247-5p
17578	0.138	0.101	-1.68043	-5.3233	-0.21425	kshv-miR-K12-5-3p
147187	0.139	0.102	1.67355	-5.33417	0.5623	hsa-miR-215
146116	0.139	0.102	1.67323	-5.33468	0.16565	hsa-miR-2116-3p
42873	0.144	0.105	-1.65758	-5.35928	-0.07225	hsa-miR-944
146111	0.144	0.106	1.65426	-5.36448	0.28955	hsa-miR-767-5p
145846	0.145	0.106	1.65217	-5.36775	0.17515	hsa-let-7e-5p
148000	0.145	0.106	1.65093	-5.36968	0.28845	hsa-miR-3195
30033	0.145	0.107	-1.64867	-5.37321	-0.14645	hsa-miR-877-5p
169295	0.146	0.107	-1.64614	-5.37714	-0.22425	hsa-miR-4725-3p
168960	0.146	0.108	-1.64577	-5.37772	-0.09125	hsa-miR-4436a
29529	0.146	0.108	1.64436	-5.37991	0.2106	hsa-miR-369-3p
169303	0.149	0.111	-1.63066	-5.40113	-0.26325	hsa-miR-378g
29802	0.149	0.111	-1.62978	-5.40249	-0.48065	hsa-miR-144-3p
168689	0.149	0.111	1.62946	-5.40299	0.22815	hsa-miR-361-3p
17377	0.151	0.112	1.62343	-5.41228	0.251	hsa-miR-600
169181	0.153	0.114	-1.6169	-5.42229	-0.11635	hsa-miR-5191
148247	0.154	0.115	-1.61174	-5.43018	-0.15305	hsa-miR-2355-3p
46474	0.155	0.115	1.6083	-5.43544	0.11905	hsa-miR-766-5p
46752	0.155	0.116	-1.60751	-5.43664	-0.14085	hsa-miR-1270
169265	0.157	0.117	-1.60014	-5.44786	-0.10915	hsa-miR-4733-3p
42638	0.157	0.118	-1.59815	-5.45087	-0.0936	hsa-miR-23a-5p
148038	0.159	0.119	1.59246	-5.4595	0.26115	hsa-miR-3679-3p
17358	0.159	0.12	-1.58978	-5.46353	-0.2988	ebv-miR-BART16
46320	0.159	0.12	-1.58821	-5.46591	-0.4454	hsa-miR-31-3p
10977	0.159	0.12	1.58795	-5.4663	0.1655	hsa-miR-183-5p
169019	0.16	0.121	-1.58448	-5.47153	-0.14195	hsa-miR-4524a-5p
29736	0.16	0.121	-1.58297	-5.47379	-0.14665	hsa-miR-656
42923	0.161	0.122	1.57905	-5.47968	0.42715	hsa-miR-30c-5p
168708	0.166	0.126	1.56137	-5.50608	0.2263	hsa-miR-296-5p
42624	0.166	0.126	1.56063	-5.50718	0.1743	kshv-miR-K12-10b
168925	0.167	0.127	1.55943	-5.50897	0.16175	hsa-miR-1273g-3p
169179	0.168	0.128	1.55351	-5.51773	0.22755	hsa-miR-4650-5p
148644	0.169	0.129	1.55136	-5.52092	0.4019	hsa-miR-551b-3p
168635	0.172	0.131	-1.54079	-5.53648	-0.27885	hsa-miR-378e
168963	0.174	0.133	-1.53292	-5.54801	-0.17215	hsa-miR-664b-5p
146161	0.174	0.133	-1.53247	-5.54866	-0.1021	hsa-miR-2115-3p
42954	0.174	0.133	-1.5323	-5.54892	-0.11945	ebv-miR-BART7-5p
147608	0.179	0.137	-1.51562	-5.57317	-0.1539	hsa-miR-4307
42522	0.179	0.138	-1.51462	-5.57461	-0.70295	ebv-miR-BART19-3p
147845	0.18	0.138	-1.5123	-5.57796	-0.1073	hsa-miR-3173-3p
147751	0.181	0.139	1.50874	-5.58311	0.12305	hsa-miR-4274
168909	0.181	0.14	-1.50683	-5.58585	-0.15285	hsa-miR-3152-5p
147804	0.181	0.14	1.50632	-5.58658	0.258	hsv1-miR-H17
10936	0.182	0.141	1.50278	-5.59168	0.18355	hsa-miR-130b-3p
169088	0.182	0.141	-1.5016	-5.59337	-0.20295	hsa-miR-4492
168928	0.184	0.143	1.49424	-5.60391	0.2352	hsa-miR-4431
17858	0.185	0.143	1.49188	-5.60728	0.12535		no information
147318	0.185	0.144	1.48961	-5.61051	0.1614	hsa-miR-3660
46869	0.185	0.144	-1.48928	-5.61098	-0.10615	hsa-miR-1258
145821	0.187	0.146	-1.48355	-5.61913	-0.09095	hsa-miR-518c-5p
169177	0.188	0.147	-1.47863	-5.6261	-0.16905	hsa-miR-4664-3p
169053	0.192	0.15	1.46789	-5.64125	0.11715	hsa-miR-130b-5p
168590	0.198	0.155	-1.44906	-5.66758	-0.0929	hsa-miR-4520a-5p/hsa-miR-4520b-5p
169184	0.198	0.155	-1.44737	-5.66992	-0.14155	hsa-miR-1304-3p
146158	0.202	0.158	-1.43704	-5.68422	-0.20275	hsa-miR-3202
42603	0.205	0.161	-1.42834	-5.69619	-0.07935	hsa-miR-424-3p
17492	0.209	0.164	-1.41721	-5.7114	-0.30605		sv40-miR-S1-5p
148410	0.212	0.167	1.40689	-5.72542	0.15835	hsa-miR-3676-3p
168650	0.217	0.171	1.39351	-5.74344	0.1534	hsa-miR-3121-5p
146086	0.217	0.172	1.39075	-5.74714	0.4519	hsa-miR-30a-5p
146089	0.217	0.172	-1.39059	-5.74736	-0.1192	hsv1-miR-H8-5p
46917	0.218	0.173	1.38731	-5.75174	0.46905	hsa-miR-205-5p
169266	0.219	0.173	-1.38596	-5.75355	-0.2623	hsa-miR-378d
42458	0.221	0.176	-1.37831	-5.76374	-0.1406	hcmv-miR-US25-1-3p
146121	0.222	0.177	1.37506	-5.76805	0.23605	hsa-miR-1470
148215	0.223	0.177	1.37229	-5.77172	0.1897	hsa-miR-3591-3p
42570	0.223	0.178	-1.3707	-5.77382	-0.08855	hsa-miR-194-3p
147809	0.225	0.179	-1.36615	-5.77983	-0.0737	hsa-miR-514b-3p
42627	0.23	0.184	-1.35242	-5.79783	-0.1311	hsa-miR-212-3p
17415	0.231	0.185	1.34787	-5.80376	0.3349	ebv-miR-BART10-3p
19007	0.232	0.186	1.34533	-5.80706	0.2855		SNORD3@
168680	0.238	0.191	-1.33076	-5.8259	-0.22225	hsa-miR-378f
11077	0.238	0.191	1.32887	-5.82833	0.30225	hsa-miR-363-3p
11040	0.254	0.204	1.29053	-5.87694	0.4495	hsa-miR-29b-3p
168951	0.257	0.207	1.28262	-5.8868	0.23495	hsa-miR-548as-3p
147739	0.259	0.209	-1.27748	-5.89318	-0.09895	hsa-miR-3161
17946	0.263	0.212	1.26823	-5.9046	0.23725	hsa-miR-192-3p
147936	0.264	0.214	1.26332	-5.91063	0.12105	kshv-miR-K12-8-5p
42504	0.264	0.214	-1.26298	-5.91106	-0.0679	hsa-miR-593-3p
169015	0.264	0.214	1.26202	-5.91223	0.1474	hsa-miR-4454
145637	0.265	0.215	1.26031	-5.91432	0.2014	hsa-miR-187-3p
169012	0.265	0.215	-1.25904	-5.91588	-0.12115	hsa-miR-4711-3p
146029	0.266	0.216	-1.25547	-5.92023	-0.06805	hsa-miR-365b-5p
148648	0.268	0.218	-1.25106	-5.9256	-0.1144	hsa-miR-1261
19005	0.268	0.219	-1.24926	-5.92778	-0.25655		SNORD118
46731	0.27	0.221	1.24262	-5.93583	0.22475	hsa-miR-4657
17427	0.27	0.221	-1.24225	-5.93627	-0.436	hsa-miR-200c-3p
32608	0.27	0.221	-1.2416	-5.93706	-0.13	hsa-miR-761
147794	0.27	0.222	-1.2411	-5.93766	-0.0974	kshv-miR-K12-8-3p
168793	0.27	0.222	-1.24026	-5.93868	-0.116	hsa-miR-4483
10946	0.27	0.222	-1.24025	-5.93869	-0.44315	hsa-miR-141-3p
42791	0.27	0.222	-1.24007	-5.9389	-0.116	hsa-miR-548b-5p
148377	0.27	0.223	1.23847	-5.94084	0.1456	hsa-miR-3653
168653	0.27	0.223	1.23819	-5.94117	0.266	hsa-miR-3158-5p
147953	0.27	0.223	-1.23737	-5.94215	-0.06965	hsa-miR-491-5p
17961	0.272	0.225	1.23281	-5.94763	0.06285	hsa-miR-629-5p
169323	0.276	0.229	1.22215	-5.96035	0.111	hsa-miR-4723-3p
169136	0.278	0.231	1.21707	-5.96639	0.14805	hsa-miR-5006-3p
168606	0.282	0.234	-1.20726	-5.97797	-0.27585	hsa-miR-4633-5p
145769	0.284	0.236	-1.2026	-5.98344	-0.09815	hsa-miR-371a-5p
42557	0.285	0.237	1.20018	-5.98627	0.1151	hsa-miR-624-5p
13132	0.29	0.241	-1.18925	-5.999	-0.09745	hsa-miR-519e-5p
146042	0.292	0.244	1.18306	-6.00616	0.19165	hsv1-miR-H8-3p
168648	0.292	0.244	-1.18191	-6.00749	-0.17165	hsa-miR-4687-5p
168973	0.295	0.247	1.17534	-6.01504	0.15335	hsa-miR-1268b
147864	0.295	0.248	1.17317	-6.01752	0.1397	hsv2-miR-H24
168631	0.295	0.248	-1.17313	-6.01757	-0.1097	hsa-miR-4723-5p
146180	0.298	0.25	-1.16666	-6.02496	-0.1409	hsa-miR-1909-3p
168682	0.301	0.253	-1.16065	-6.03178	-0.09745	hsa-miR-4502
169312	0.304	0.256	1.15172	-6.04187	0.09685	hsa-miR-548an
168571	0.304	0.256	1.1512	-6.04246	0.08125	hsa-miR-550b-2-5p
145852	0.306	0.258	1.14654	-6.04769	0.22375	hsa-miR-210
169188	0.306	0.258	1.1461	-6.04819	0.0754	hsa-miR-4443
46258	0.319	0.27	1.11902	-6.07818	0.27745	hsa-miR-1184
42811	0.319	0.27	-1.11894	-6.07826	-0.24235	hsa-miR-542-5p
145990	0.321	0.272	-1.11281	-6.08496	-0.09475	ebv-miR-BART21-3p
17928	0.323	0.274	1.10965	-6.0884	0.0877	hsa-miR-181a-2-3p
168701	0.331	0.282	-1.09141	-6.10807	-0.09145	hsa-miR-4728-5p
17306	0.333	0.283	1.0875	-6.11225	0.1385	ebv-miR-BART12
145678	0.346	0.294	-1.06244	-6.13868	-0.1303	hsa-miR-150-5p
46810	0.349	0.297	-1.05541	-6.14598	-0.09825	hsa-miR-1827
17892	0.354	0.302	-1.04599	-6.15571	-0.06695		no information
169023	0.357	0.305	-1.03966	-6.16219	-0.10875	hsa-miR-4712-3p
168811	0.364	0.312	1.02438	-6.1777	0.145	hsa-miR-1255b-2-3p
168792	0.372	0.319	-1.00926	-6.19283	-0.0904	hsa-miR-4434
42769	0.375	0.321	-1.00432	-6.19772	-0.1945	hsa-let-7b-3p
46737	0.375	0.322	1.00254	-6.19948	0.11345	hsa-miR-1265
11007	0.376	0.323	-0.99962	-6.20236	-0.0642	hsa-miR-206
169126	0.376	0.323	0.99958	-6.20239	0.10095	hsa-miR-4486
168802	0.385	0.332	-0.98227	-6.2193	-0.2259	hsa-miR-4516
147631	0.39	0.336	0.97262	-6.22859	0.1943	hsa-miR-4258
148493	0.392	0.338	0.96881	-6.23225	0.228	hsa-miR-3613-3p
168979	0.393	0.34	-0.96568	-6.23523	-0.14465	hsa-miR-4734
148118	0.399	0.345	-0.95498	-6.24537	-0.23035	hsa-miR-676-5p
168798	0.4	0.346	0.95253	-6.24768	0.2316	hsa-miR-4668-5p
42530	0.4	0.347	-0.95214	-6.24804	-0.07455	hsa-let-7a-2-3p
6880	0.401	0.348	0.9485	-6.25146	0.06255	hsa-miR-297
168595	0.402	0.349	0.94663	-6.25321	0.12205	hsa-miR-1185-2-3p
42746	0.403	0.351	-0.9428	-6.25678	-0.12075	hsa-miR-647
42661	0.407	0.355	0.93618	-6.26292	0.14345	hsa-miR-492
145831	0.41	0.358	0.93067	-6.26801	0.22065	hsa-miR-625-5p
169137	0.411	0.359	0.92721	-6.27118	0.1138	hsa-miR-4524b-5p
168605	0.419	0.367	-0.91249	-6.28456	-0.26115	hsa-miR-4653-3p
11037	0.427	0.374	0.89942	-6.29628	0.11175	hsa-miR-299-3p
46829	0.429	0.376	0.89552	-6.29974	0.0989	hsa-miR-664a-5p
42738	0.43	0.378	-0.89183	-6.30301	-0.12465	hsa-miR-340-3p
11004	0.432	0.38	0.88841	-6.30602	0.29525	hsa-miR-203a
147755	0.432	0.38	-0.88713	-6.30714	-0.15095	hsa-miR-378c
147889	0.435	0.384	0.88091	-6.31258	0.0859	hsv1-miR-H14-3p
168564	0.437	0.385	-0.87764	-6.31543	-0.1466	hsa-miR-548at-5p
148085	0.442	0.39	0.86858	-6.32327	0.1576	hsa-miR-3687
11038	0.445	0.393	0.86249	-6.32849	0.1564	hsa-miR-299-5p
168965	0.445	0.394	-0.86143	-6.32939	-0.05555	hsa-miR-4765
147662	0.447	0.396	-0.85743	-6.3328	-0.0977	hsv2-miR-H6-5p
42532	0.45	0.399	0.85245	-6.33703	0.10775	hsa-miR-22-5p
42899	0.459	0.408	-0.83651	-6.35037	-0.039	hsa-miR-377-5p
17822	0.459	0.408	-0.83607	-6.35074	-0.1181	hsa-miR-490-5p
147975	0.459	0.408	-0.8352	-6.35146	-0.05245		no information
42951	0.462	0.412	-0.82921	-6.35641	-0.1806	ebv-miR-BHRF1-2-3p
169223	0.462	0.412	-0.82823	-6.35721	-0.092	hsa-miR-4680-3p
146123	0.462	0.413	0.82791	-6.35747	0.0969	hsv1-miR-H2-3p
42692	0.471	0.421	0.81267	-6.36988	0.07845	hsa-miR-127-5p
28191	0.475	0.426	0.80478	-6.37622	0.2803	hsa-miR-30e-5p
11121	0.476	0.427	0.80316	-6.37752	0.13235	hsa-miR-489
13130	0.486	0.436	-0.78664	-6.39057	-0.0754	hsa-miR-517-5p
42898	0.487	0.437	-0.78433	-6.39237	-0.10645	hsa-miR-124-5p
169135	0.487	0.438	-0.78321	-6.39324	-0.06115	hsa-miR-3173-5p
168914	0.494	0.445	-0.77203	-6.40189	-0.0866	hsa-miR-5689
169356	0.498	0.449	0.76397	-6.40805	0.1693	hsa-miR-548aa/hsa-miR-548ap-3p/hsa-miR-548t-3p
42929	0.498	0.45	-0.76346	-6.40843	-0.0783	hsa-miR-25-5p
168637	0.507	0.458	-0.74936	-6.41904	-0.14735	hsa-miR-3940-5p
168915	0.508	0.46	-0.74663	-6.42108	-0.09925	hsa-miR-4780
145827	0.51	0.462	-0.74265	-6.42403	-0.0839	hsa-miR-200a-5p
168918	0.52	0.471	-0.72754	-6.43509	-0.08375	hsa-miR-4491
169379	0.531	0.482	-0.70902	-6.44835	-0.13305	hsa-miR-4694-3p
11134	0.531	0.482	0.70886	-6.44846	0.03395	hsa-miR-502-5p
146098	0.546	0.497	0.68545	-6.46474	0.14445	hsv1-miR-H5-3p
168819	0.547	0.498	-0.68414	-6.46563	-0.28455	hsa-miR-200a-3p
46281	0.554	0.506	-0.6718	-6.47398	-0.0543	hsa-miR-1291
27537	0.566	0.517	0.65417	-6.48565	0.1153	ebv-miR-BART13-3p
10952	0.57	0.521	0.64694	-6.49035	0.2001	hsa-miR-146a-5p
145974	0.571	0.523	-0.64492	-6.49165	-0.0827	hsa-miR-200b-5p
168878	0.571	0.523	0.6447	-6.49179	0.0801	hsa-miR-5100
11108	0.573	0.526	-0.63999	-6.49481	-0.08175	hsa-miR-425-3p
169068	0.579	0.532	-0.63065	-6.50075	-0.04505	hsa-miR-513c-3p
169049	0.587	0.54	0.61833	-6.50844	0.11215	hsa-miR-3162-3p
168656	0.593	0.546	0.6095	-6.51386	0.08185	hsa-miR-5002-3p
169253	0.599	0.552	0.60037	-6.51938	0.05845	hsa-miR-4690-5p
14300	0.606	0.558	0.59005	-6.52553	0.1275	hsa-miR-29c-5p
168614	0.614	0.566	-0.57793	-6.53261	-0.10935	hsa-miR-5197-5p
17818	0.615	0.569	0.57482	-6.53441	0.05565	hsa-miR-27a-5p
147831	0.615	0.569	0.57428	-6.53472	0.06605	kshv-miR-K12-1-3p
11041	0.621	0.575	-0.5648	-6.54012	-0.1756	hsa-miR-29c-3p
29379	0.621	0.576	0.56443	-6.54033	0.0538	hsa-miR-452-5p
147907	0.624	0.58	-0.55845	-6.54369	-0.0553	hsa-miR-4312
17668	0.626	0.582	-0.55524	-6.54549	-0.13335	hsa-miR-552
169130	0.634	0.59	0.54343	-6.55198	0.1167	hsa-miR-4764-3p
147600	0.645	0.601	0.52756	-6.5605	0.0832	hsa-miR-4292
168611	0.646	0.603	0.52459	-6.56207	0.03945	hsa-miR-4753-3p
56873	0.658	0.615	0.50743	-6.57095	0.066	hsa-miR-3124-5p
17541	0.671	0.627	-0.48929	-6.58002	-0.1209	ebv-miR-BART1-5p
42843	0.674	0.631	0.4845	-6.58236	0.0403	hsa-miR-654-5p
45764	0.682	0.639	0.47299	-6.58789	0.02805	hsa-miR-302e
168765	0.683	0.64	0.47117	-6.58875	0.07805	hsa-miR-4448
46363	0.695	0.652	-0.45432	-6.59658	-0.02655	hsa-miR-1272
169020	0.704	0.662	-0.4406	-6.60274	-0.06295	hsa-miR-4506
147840	0.708	0.666	0.43479	-6.6053	0.05155	hsv2-miR-H9-3p
168841	0.714	0.673	-0.42578	-6.60919	-0.0471	hsa-miR-5588-3p
46416	0.737	0.698	0.39142	-6.6105	0.02856	hsa-miR-1293
168768	0.716	0.675	-0.42216	-6.61073	-0.0553	hsa-miR-4423-5p
17359	0.723	0.682	0.41284	-6.61464	0.08665	ebv-miR-BART4-5p
168753	0.727	0.687	-0.40626	-6.61735	-0.06365	hsa-miR-4741
42792	0.733	0.694	0.39691	-6.62113	0.0578	hsa-miR-29b-2-5p
168994	0.739	0.7	0.38769	-6.62477	0.03275	hsa-miR-3591-5p
147851	0.758	0.72	-0.36133	-6.6347	-0.03695	hsa-miR-3201
168670	0.758	0.72	-0.36047	-6.63501	-0.06545	hsa-miR-4694-5p
42761	0.767	0.73	-0.34796	-6.63946	-0.07065	hsa-miR-675-5p
146127	0.772	0.735	-0.3408	-6.64195	-0.03795	hsa-miR-449b-3p
13140	0.773	0.737	-0.33851	-6.64273	-0.02935	hsa-miR-138-5p
46259	0.774	0.739	-0.33595	-6.6436	-0.0179	hsa-miR-885-5p
168869	0.785	0.75	-0.32103	-6.64853	-0.02055	hsa-miR-5010-3p
147186	0.791	0.756	-0.3122	-6.65135	-0.10815	hsa-miR-200b-3p
169326	0.796	0.762	0.30528	-6.6535	0.02625	hsa-miR-451b
169211	0.802	0.769	0.29623	-6.65624	0.055	hsa-miR-5704
145838	0.811	0.778	0.28421	-6.65975	0.03655	hsa-miR-125b-1-3p
146058	0.818	0.786	-0.27353	-6.66276	-0.01425	hsv1-miR-H3-3p
168935	0.818	0.787	0.27259	-6.66301	0.0588	hsa-miR-4687-3p
13171	0.819	0.788	0.27075	-6.66352	0.0801	hsa-miR-429
10988	0.832	0.802	0.25299	-6.6682	0.10555	hsa-miR-194-5p
145647	0.847	0.817	-0.23315	-6.67306	-0.0233	hsa-miR-584-5p
169109	0.885	0.854	0.18469	-6.68327	0.03425	hsa-miR-5003-5p
145934	0.886	0.856	0.18209	-6.68375	0.01395		no information
42654	0.89	0.86	-0.17705	-6.68466	-0.04075	hsa-miR-483-5p
147570	0.895	0.867	0.16853	-6.68615	0.0277	hsa-miR-4271
169247	0.895	0.867	-0.16804	-6.68623	-0.01905	hsa-miR-4477a
168686	0.895	0.868	-0.16724	-6.68637	-0.0172	hsa-miR-4768-5p
145640	0.9	0.874	-0.15946	-6.68765	-0.012	hsa-miR-328
168750	0.904	0.879	-0.1529	-6.68868	-0.01625	hsa-miR-4645-5p
17732	0.905	0.881	0.15037	-6.68907	0.06515	hsa-miR-192-5p
148288	0.911	0.888	-0.14144	-6.69038	-0.0075	hsa-miR-550b-3p
42866	0.911	0.889	-0.1405	-6.69052	-0.0708	hsa-miR-451a
168644	0.911	0.89	-0.13935	-6.69068	-0.0075	hsa-miR-4775
42466	0.911	0.89	-0.1392	-6.6907	-0.01565	ebv-miR-BART18-3p
145840	0.913	0.893	-0.1351	-6.69127	-0.01055	hsa-let-7f-1-3p
146169	0.926	0.907	-0.11722	-6.69355	-0.00765	mcv-miR-M1-3p
145976	0.933	0.915	0.10795	-6.6946	0.0099	hsa-miR-663b
146072	0.934	0.917	-0.10537	-6.69488	-0.0179	hsa-miR-1469
42812	0.944	0.927	0.092	-6.69621	0.0149	hsa-miR-508-5p
168890	0.945	0.93	-0.08817	-6.69656	-0.0045	hsa-miR-1306-5p
14328	0.945	0.93	0.08784	-6.69659	0.01485	hsa-miR-124-3p
145722	0.945	0.932	0.08616	-6.69673	0.0054	hsa-miR-520e
148264	0.949	0.936	0.08059	-6.6972	0.01595	hsa-miR-3665
42672	0.957	0.945	-0.06961	-6.69803	-0.00645	hsa-miR-323b-5p
169120	0.968	0.957	-0.05385	-6.69902	-0.0059	hsa-miR-4787-3p
27568	0.969	0.959	-0.05213	-6.69911	-0.00815	hsa-miR-744-5p
42756	0.976	0.967	0.0412	-6.69962	0.00385	hsa-miR-548d-5p
42446	0.981	0.973	-0.03451	-6.69988	-0.0022	hsa-miR-576-5p
10987	0.982	0.975	0.03209	-6.69996	0.0055	hsa-miR-193b-3p
147722	0.986	0.98	0.02497	-6.70016	0.00275	hsa-miR-4306
169070	0.987	0.982	-0.02275	-6.70022	-0.0024	hsa-miR-4695-3p
46264	0.987	0.983	-0.02094	-6.70026	-0.0018	hsa-miR-298
146136	0.988	0.985	-0.01891	-6.7003	-0.00125	hsa-miR-518d-5p/hsa-miR-520c-5p/hsa-miR-526a
145847	0.991	0.989	-0.0138	-6.70038	-0.0007	hsa-miR-766-3p
169010	0.996	0.995	-0.00623	-6.70046	-0.0007	hsa-miR-2681-3p
169115	0.999	0.999	-0.00132	-6.70048	-0.0001	hsa-miR-450a-3p

## Sheet: Sheet1
miRNA_ID_LIST
hsa-miR-181b-5p
hsa-miR-23a-3p
hsa-miR-181a-5p
hsa-miR-4291
hsa-miR-331-3p
hsa-miR-214-3p
hsa-miR-181d
hsa-miR-92a-3p
hsa-miR-93-5p
hsa-miR-21-3p
hsa-miR-4262
hsa-miR-196a-5p
hsa-miR-214-5p
hsa-miR-3175
hsa-miR-199a-5p
hsa-miR-196b-5p
hsa-miR-4317
hsa-miR-4797-5p
hsa-miR-24-3p
hsa-miR-335-5p
hsa-miR-127-3p
hsa-miR-455-3p
hsa-miR-223-3p
hsa-miR-18a-5p
hsa-miR-23c
hsa-miR-135b-5p
hsa-miR-103a-3p
hsa-miR-18b-5p
hsa-miR-21-5p
hsa-miR-106a-5p
hsa-miR-301a-3p
hsa-miR-4791
hsa-miR-106b-5p
hsa-miR-99b-5p
hsa-miR-10b-5p
hsa-miR-27b-3p
hsa-miR-377-3p
hsa-miR-10a-5p
hsa-miR-454-3p
hsa-miR-125b-5p
hsa-miR-17-5p
hsa-miR-4324
hsa-miR-23b-3p
hsa-miR-143-5p
hsa-miR-151a-5p
hsa-miR-708-5p
hsa-miR-199-3p
hsa-miR-28-5p
hsa-miR-151-5p
hsa-miR-193a-3p
hsa-miR-20a-5p
hsa-miR-4770
hsa-miR-95
hsa-miR-642b-3p
hsa-miR-27a-3p
hsa-miR-100-5p
hsa-miR-199b-5p
hsa-miR-20b-5p
hsa-miR-145-3p
hsa-miR-130a-3p
hsa-miR-218-5p
hsa-miR-342-3p
hsa-miR-374c-5p
hsa-miR-98-5p
hsa-miR-145-5p
hsa-miR-19a-3p
hsa-miR-374b-5p
hsa-miR-99a-5p
hsa-miR-4328
hsa-miR-15a-5p
hsa-miR-142-3p
hsa-miR-1
hsa-miR-140-5p
hsa-miR-126-5p
hsa-miR-133a
hsa-miR-126-3p
hsa-miR-374a-5p
hsa-miR-32-5p
hsa-miR-143-3p
hsa-miR-4284
hsa-miR-1297
hsa-miR-195-5p
hsa-miR-26b-5p
hsa-miR-16-5p
hsa-miR-4290
hsa-miR-4268
hsa-miR-4279
hsa-miR-891a
hsa-miR-1269b
hsa-miR-4539
hsa-miR-660-3p
hsa-miR-4661-5p
hsa-miR-4501
hsa-miR-4636
hsa-miR-665
hsa-miR-1298
hsa-miR-148a-3p
hsa-miR-943
hsa-miR-4795-3p
hsa-miR-652-5p
hsa-miR-1275
hsa-miR-375

## Sheet: Sheet4
hsa-miR-4290
hsa-miR-4268
hsa-miR-4279
hsa-miR-891a
hsa-miR-1269b
hsa-miR-4539
hsa-miR-660-3p
hsa-miR-4661-5p
hsa-miR-4501
hsa-miR-4636
hsa-miR-665
hsa-miR-1298
hsa-miR-148a-3p
hsa-miR-943
hsa-miR-4795-3p
hsa-miR-652-5p
hsa-miR-1275
hsa-miR-375

## Sheet: GSE93415-1
ID	adj.P.Val	P.Value	t	B	logFC	miRNA_ID_LIST
10972	1.79e-08	4.19e-11	8.90515	15.2515	1.20595	hsa-miR-181b-5p
169282	1.79e-08	8.88e-11	-8.66078	14.5236	-1.2741	hsa-miR-4290
147942	1.79e-08	9.13e-11	-8.65179	14.4967	-1.2915	hsa-miR-4268
147767	2.7e-08	1.94e-10	-8.40929	13.767	-1.08415	hsa-miR-4279
42744	4.99e-08	5.12e-10	8.09824	12.8213	1.6759	hsa-miR-23a-3p
27961	5.9e-08	7.27e-10	-7.98733	12.4815	-1.2999	hsa-miR-891a
42865	6.49e-08	1.02e-09	7.88025	12.1523	1.15225	hsa-miR-181a-5p
147616	6.49e-08	1.12e-09	7.85171	12.0644	1.49555	hsa-miR-4291
168739	6.49e-08	1.13e-09	-7.84712	12.0502	-1.01665	hsa-miR-1269b
42887	9.39e-08	1.73e-09	7.7129	11.6356	1.17655	hsa-miR-331-3p
168625	1.15e-07	2.36e-09	-7.61674	11.3375	-1.4428	hsa-miR-4539
145633	4.27e-07	1.1e-08	-7.13791	9.84163	-1.5582	hsa-let-7d-3p
11014	4.58e-07	1.22e-08	7.10394	9.73489	1.6432	hsa-miR-214-3p
169408	4.88e-07	1.45e-08	7.05056	9.56697	1.02855	hsa-miR-181d
169375	5.66e-07	1.74e-08	-6.99472	9.39116	-1.34425	hsa-miR-660-3p
145693	1.95e-06	8.67e-08	6.50041	7.82826	1.1539	hsa-miR-92a-3p
168729	1.95e-06	9.18e-08	-6.48277	7.77231	-1.37635	hsa-miR-4661-5p
30687	2.11e-06	1.12e-07	6.42097	7.57632	1.2741	hsa-miR-93-5p
42524	4.35e-06	2.71e-07	6.15075	6.71874	1.0627	hsa-miR-21-3p
147673	4.35e-06	2.72e-07	6.14972	6.71546	1.29615	hsa-miR-4262
10990	4.96e-06	3.21e-07	6.09955	6.55623	1.84665	hsa-miR-196a-5p
145822	5.73e-06	3.88e-07	6.04132	6.37142	1.34045	hsa-miR-214-5p
147891	8.46e-06	6.68e-07	5.87456	5.84258	1.0534	hsa-miR-3175
29562	9.4e-06	7.61e-07	5.83462	5.71605	1.9549	hsa-miR-199a-5p
145889	1.76e-05	1.61e-06	5.60549	4.99132	1.3817	hsa-miR-196b-5p
168941	1.77e-05	1.64e-06	-5.59972	4.97312	-1.06575	hsa-miR-4501
147776	1.87e-05	1.79e-06	5.57314	4.88923	1.3077	hsa-miR-4317
168942	1.98e-05	1.93e-06	-5.54918	4.81365	-1.6101	hsa-miR-4636
145768	2.76e-05	2.86e-06	-5.42848	4.43352	-1.04775	hsa-miR-665
46381	2.85e-05	2.99e-06	-5.41475	4.39037	-1.3332	hsa-miR-1298
145746	3.56e-05	4.09e-06	5.31758	4.08531	1.1308	hsa-let-7i-3p
169022	4.04e-05	4.77e-06	5.27022	3.93696	1.12	hsa-miR-4797-5p
9938	4.9e-05	5.99e-06	5.19957	3.71603	1.35135	hsa-let-7i-5p
17506	4.93e-05	6.12e-06	5.19304	3.69565	1.4939	hsa-miR-24-3p
11065	5.24e-05	6.89e-06	5.15629	3.58099	1.161	hsa-miR-335-5p
42829	5.24e-05	7.01e-06	5.15121	3.56514	1.0754	hsa-miR-127-3p
28950	5.24e-05	7.1e-06	5.14702	3.5521	1.13355	hsa-miR-455-3p
11024	5.43e-05	7.46e-06	5.1315	3.50374	1.88165	hsa-miR-223-3p
147195	5.69e-05	7.94e-06	5.11239	3.44422	1.1581	hsa-miR-18a-5p
148217	6.71e-05	9.5e-06	5.05659	3.27071	1.37485	hsa-miR-23c
145914	7.07e-05	1.03e-05	5.03037	3.18932	1.6218	hsa-miR-135b-5p
10919	7.39e-05	1.09e-05	5.01336	3.13656	1.0812	hsa-miR-103a-3p
145670	8.08e-05	1.23e-05	4.975	3.01773	1.1835	hsa-miR-18b-5p
147506	8.56e-05	1.35e-05	4.94642	2.92933	1.74065	hsa-miR-21-5p
46801	8.56e-05	1.36e-05	4.94467	2.92393	1.3585	hsa-miR-106a-5p
13143	8.56e-05	1.36e-05	4.9446	2.92371	1.13955	hsa-miR-301a-3p
168995	8.72e-05	1.39e-05	4.93687	2.89982	1.1992	hsa-miR-4791
19582	8.88e-05	1.43e-05	4.92922	2.8762	1.03365	hsa-miR-106b-5p
10955	9.32e-05	1.52e-05	-4.90921	2.81445	-1.1978	hsa-miR-148a-3p
11184	9.41e-05	1.58e-05	4.89759	2.77861	1.0711	hsa-miR-99b-5p
10925	0.000105	1.82e-05	4.853	2.64126	1.5553	hsa-miR-10b-5p
147199	0.000111	1.94e-05	4.83296	2.57962	1.5312	hsa-miR-27b-3p
11091	0.000123	2.18e-05	4.79765	2.4712	1.0685	hsa-miR-377-3p
13485	0.00013	2.32e-05	4.77703	2.40798	1.6371	hsa-miR-10a-5p
148620	0.000132	2.36e-05	4.77194	2.39237	1.0083	hsa-miR-454-3p
17888	0.000133	2.4e-05	4.76688	2.37688	1.0297	hsa-let-7a-3p
42696	0.000135	2.45e-05	-4.7602	2.35644	-1.09755	hsa-miR-943
30787	0.000158	2.98e-05	4.69867	2.16841	1.98925	hsa-miR-125b-5p
168776	0.00016	3.07e-05	-4.68965	2.14089	-1.32	hsa-miR-4795-3p
169336	0.000188	3.83e-05	4.61906	1.92616	1.48005	hsa-miR-17-5p
168980	0.00019	3.9e-05	4.61325	1.90852	1.42875	hsa-miR-4324
169330	0.000219	4.69e-05	4.55461	1.73094	1.7481	hsa-miR-23b-3p
46467	0.000272	6.05e-05	4.47356	1.48665	1.47935	hsa-miR-143-5p
11260	0.000289	6.59e-05	4.44651	1.40543	1.0909	hsa-miR-151a-5p
29190	0.000293	6.78e-05	4.4375	1.37841	1.1161	hsa-miR-708-5p
10995	0.000302	7.08e-05	4.42365	1.33692	2.15675	hsa-miR-199a-3p/hsa-miR-199b-3p
146049	0.000302	7.13e-05	4.42122	1.32965	1.1807	hsa-miR-28-5p
168871	0.00031	7.34e-05	4.41181	1.30148	1.0133	hsa-miR-151a-5p/hsa-miR-151b
10986	0.000316	7.51e-05	4.40466	1.2801	1.2192	hsa-miR-193a-3p
145845	0.0004	0.000102	4.30732	0.99021	1.6848	hsa-miR-20a-5p
168783	0.000401	0.000102	4.3048	0.98273	1.04695	hsa-miR-4770
11181	0.000408	0.000106	4.29402	0.95077	1.42215	hsa-miR-95
168642	0.000417	0.000109	4.28609	0.92728	1.1205	hsa-miR-642b-3p
46483	0.000426	0.000111	4.27772	0.90251	1.82315	hsa-miR-27a-3p
145933	0.000479	0.000134	-4.21664	0.72226	-1.0006	hsa-miR-652-5p
145943	0.000671	0.000196	4.09338	0.36155	1.7058	hsa-miR-100-5p
19591	0.000924	0.00029	3.96413	-0.01201	1.58665	hsa-miR-199b-5p
169082	0.00105	0.000348	-3.90418	-0.18352	-1.20965	hsa-miR-1275
42640	0.00109	0.000364	3.88931	-0.22587	1.5978	hsa-miR-20b-5p
31867	0.00115	0.000388	3.86752	-0.28783	1.4278	hsa-miR-145-3p
10138	0.00127	0.000441	3.82481	-0.40877	1.51825	hsa-miR-130a-3p
145968	0.00131	0.000458	3.81203	-0.44486	1.1829	hsa-let-7d-5p
11018	0.00138	0.000484	3.79375	-0.49636	1.1708	hsa-miR-218-5p
32884	0.00139	0.00049	3.78965	-0.50789	1.0393	hsa-miR-342-3p
147919	0.00139	0.000494	-3.78683	-0.51582	-1.00195	kshv-miR-K12-12-3p
148430	0.00144	0.000512	3.77463	-0.5501	1.20905	hsa-miR-374c-5p
11182	0.0015	0.000544	3.75393	-0.60813	1.3647	hsa-miR-98-5p
42641	0.00175	0.000659	3.68939	-0.78814	1.483	hsa-miR-145-5p
10997	0.00178	0.000676	3.68035	-0.81321	1.0951	hsa-miR-19a-3p
148098	0.00206	0.000794	3.62567	-0.96433	1.00765	hsa-miR-374b-5p
42708	0.00277	0.00111	3.51104	-1.27734	1.60425	hsa-miR-99a-5p
147771	0.00308	0.00128	3.4606	-1.41342	1.45485	hsa-miR-4328
17752	0.00325	0.00136	3.43878	-1.47196	1.47695	hsa-let-7f-5p
27720	0.005	0.00228	3.25565	-1.95512	1.10745	hsa-miR-15a-5p
10947	0.00568	0.00266	3.20095	-2.09648	1.5088	hsa-miR-142-3p
10916	0.00572	0.00269	3.19657	-2.10774	1.6699	hsa-miR-1
4700	0.00585	0.00277	3.18529	-2.1367	1.25455	hsa-miR-140-5p
33596	0.00597	0.00283	3.17765	-2.15627	1.35535	hsa-miR-126-5p
46918	0.00684	0.0033	-3.12219	-2.29753	-1.06525	hsa-miR-375
146137	0.0071	0.00344	3.10697	-2.33605	1.0509	hsa-miR-133a
4610	0.00826	0.00407	3.04461	-2.49259	1.51835	hsa-miR-126-3p
145844	0.0091	0.00463	2.99697	-2.61085	1.3449	hsa-miR-374a-5p
46438	0.0107	0.00554	2.92959	-2.77609	1.16625	hsa-let-7g-5p
11053	0.0112	0.00589	2.90669	-2.83171	1.01255	hsa-miR-32-5p
147162	0.0112	0.00589	2.9063	-2.83266	1.48995	hsa-let-7a-5p
13177	0.012	0.00639	2.87531	-2.90745	1.4245	hsa-miR-143-3p
169129	0.0184	0.0105	2.68446	-3.35618	1.34255	hsa-miR-4284
46944	0.0196	0.0113	2.65503	-3.42351	1.10515	hsa-miR-1297
13148	0.0253	0.0152	2.53517	-3.69222	1.2995	hsa-miR-195-5p
146008	0.0384	0.024	2.3453	-4.09925	1.16125	hsa-miR-26b-5p
10967	0.0385	0.024	2.34411	-4.10174	1.19915	hsa-miR-16-5p

## Sheet: 0.001
hsa-mir-181b-5p
hsa-mir-4290
hsa-mir-4268
hsa-mir-4279
hsa-mir-23a-3p
hsa-mir-891a
hsa-mir-181a-5p
hsa-mir-4291
hsa-mir-1269b
hsa-mir-331-3p
hsa-mir-4539
hsa-let-7d-3p
hsa-mir-214-3p
hsa-mir-181d
hsa-mir-660-3p
hsa-mir-92a-3p
hsa-mir-4661-5p
hsa-mir-93-5p
hsa-mir-21-3p
hsa-mir-4262
hsa-mir-196a-5p
hsa-mir-214-5p
hsa-mir-3175
hsa-mir-199a-5p
hsa-mir-196b-5p
hsa-mir-4501
hsa-mir-4317
hsa-mir-4636
hsa-mir-665
hsa-mir-1298
hsa-let-7i-3p
hsa-mir-4797-5p
hsa-let-7i-5p
hsa-mir-24-3p
hsa-mir-335-5p
hsa-mir-127-3p
hsa-mir-455-3p
hsa-mir-223-3p
hsa-mir-18a-5p
hsa-mir-23c
hsa-mir-135b-5p
hsa-mir-103a-3p
hsa-mir-18b-5p
hsa-mir-21-5p
hsa-mir-106a-5p
hsa-mir-301a-3p
hsa-mir-4791
hsa-mir-106b-5p
hsa-mir-148a-3p
hsa-mir-99b-5p
hsa-mir-10b-5p
hsa-mir-27b-3p
hsa-mir-377-3p
hsa-mir-10a-5p
hsa-mir-454-3p
hsa-let-7a-3p
hsa-mir-943
hsa-mir-125b-5p
hsa-mir-4795-3p
hsa-mir-17-5p
hsa-mir-4324
hsa-mir-23b-3p
hsa-mir-143-5p
hsa-mir-151a-5p
hsa-mir-708-5p
hsa-mir-199a-3p
hsa-mir-28-5p
hsa-mir-151a-5p
hsa-mir-193a-3p
hsa-mir-20a-5p
hsa-mir-4770
hsa-mir-95
hsa-mir-642b-3p
hsa-mir-27a-3p
hsa-mir-652-5p
hsa-mir-100-5p
hsa-mir-199b-5p

## Sheet: up
miRNA_ID_LIST
hsa-miR-181b-5p
hsa-miR-23a-3p
hsa-miR-181a-5p
hsa-miR-4291
hsa-miR-331-3p
hsa-miR-214-3p
hsa-miR-181d
hsa-miR-92a-3p
hsa-miR-93-5p
hsa-miR-21-3p
hsa-miR-4262
hsa-miR-196a-5p
hsa-miR-214-5p
hsa-miR-3175
hsa-miR-199a-5p
hsa-miR-196b-5p
hsa-miR-4317
hsa-miR-4797-5p
hsa-miR-24-3p
hsa-miR-335-5p
hsa-miR-127-3p
hsa-miR-455-3p
hsa-miR-223-3p
hsa-miR-18a-5p
hsa-miR-23c
hsa-miR-135b-5p
hsa-miR-103a-3p
hsa-miR-18b-5p
hsa-miR-21-5p
hsa-miR-106a-5p
hsa-miR-301a-3p
hsa-miR-4791
hsa-miR-106b-5p
hsa-miR-99b-5p
hsa-miR-10b-5p
hsa-miR-27b-3p
hsa-miR-377-3p
hsa-miR-10a-5p
hsa-miR-454-3p
hsa-miR-125b-5p
hsa-miR-17-5p
hsa-miR-4324
hsa-miR-23b-3p
hsa-miR-143-5p
hsa-miR-151a-5p
hsa-miR-708-5p
hsa-miR-199a-3p
hsa-miR-28-5p
hsa-miR-193a-3p
hsa-miR-20a-5p
hsa-miR-4770
hsa-miR-95
hsa-miR-642b-3p
hsa-miR-27a-3p
hsa-miR-100-5p
hsa-miR-199b-5p
hsa-miR-20b-5p
hsa-miR-145-3p
hsa-miR-130a-3p
hsa-miR-218-5p
hsa-miR-342-3p
hsa-miR-374c-5p
hsa-miR-98-5p
hsa-miR-145-5p
hsa-miR-19a-3p
hsa-miR-374b-5p
hsa-miR-99a-5p
hsa-miR-4328
hsa-miR-15a-5p
hsa-miR-142-3p
hsa-miR-1
hsa-miR-140-5p
hsa-miR-126-5p
hsa-miR-133a
hsa-miR-126-3p
hsa-miR-374a-5p
hsa-miR-32-5p
hsa-miR-143-3p
hsa-miR-4284
hsa-miR-1297
hsa-miR-195-5p
hsa-miR-26b-5p
hsa-miR-16-5p

## Sheet: down
miRNA_ID_LIST
hsa-miR-1269b
hsa-miR-1275
hsa-miR-1298
hsa-miR-148a-3p
hsa-miR-375
hsa-miR-4268
hsa-miR-4279
hsa-miR-4290
hsa-miR-4501
hsa-miR-4539
hsa-miR-4636
hsa-miR-4661-5p
hsa-miR-4795-3p
hsa-miR-652-5p
hsa-miR-660-3p
hsa-miR-665
hsa-miR-891a
hsa-miR-943

## Sheet: up+down
mirNA
hsa-mir-181b-5p
hsa-mir-23a-3p
hsa-mir-181a-5p
hsa-mir-4291
hsa-mir-331-3p
hsa-mir-214-3p
hsa-mir-181d-5p
hsa-mir-92a-3p
hsa-mir-93-5p
hsa-mir-21-3p
hsa-mir-4262
hsa-mir-196a-5p
hsa-mir-214-5p
hsa-mir-3175
hsa-mir-199a-5p
hsa-mir-196b-5p
hsa-mir-4317
hsa-mir-4797-5p
hsa-mir-24-3p
hsa-mir-335-5p
hsa-mir-127-3p
hsa-mir-455-3p
hsa-mir-223-3p
hsa-mir-18a-5p
hsa-mir-23c
hsa-mir-135b-5p
hsa-mir-103a-3p
hsa-mir-18b-5p
hsa-mir-21-5p
hsa-mir-106a-5p
hsa-mir-301a-3p
hsa-mir-4791
hsa-mir-106b-5p
hsa-mir-99b-5p
hsa-mir-10b-5p
hsa-mir-27b-3p
hsa-mir-377-3p
hsa-mir-10a-5p
hsa-mir-454-3p
hsa-mir-125b-5p
hsa-mir-17-5p
hsa-mir-4324
hsa-mir-23b-3p
hsa-mir-143-5p
hsa-mir-151a-5p
hsa-mir-708-5p
hsa-mir-199a-3p
hsa-mir-28-5p
hsa-mir-193a-3p
hsa-mir-20a-5p
hsa-mir-4770
hsa-mir-95
hsa-mir-642b-3p
hsa-mir-27a-3p
hsa-mir-100-5p
hsa-mir-199b-5p
hsa-mir-20b-5p
hsa-mir-145-3p
hsa-mir-130a-3p
hsa-mir-218-5p
hsa-mir-342-3p
hsa-mir-374c-5p
hsa-mir-98-5p
hsa-mir-145-5p
hsa-mir-19a-3p
hsa-mir-374b-5p
hsa-mir-99a-5p
hsa-mir-4328
hsa-mir-15a-5p
hsa-mir-142-3p
hsa-mir-1
hsa-mir-140-5p
hsa-mir-126-5p
hsa-mir-133a-3p
hsa-mir-126-3p
hsa-mir-374a-5p
hsa-mir-32-5p
hsa-mir-143-3p
hsa-mir-4284
hsa-mir-1297
hsa-mir-195-5p
hsa-mir-26b-5p
hsa-mir-16-5p
hsa-mir-4290
hsa-mir-4268
hsa-mir-4279
hsa-mir-891a
hsa-mir-1269b
hsa-mir-4539
hsa-mir-660-3p
hsa-mir-4661-5p
hsa-mir-4501
hsa-mir-4636
hsa-mir-665
hsa-mir-1298
hsa-mir-148a-3p
hsa-mir-943
hsa-mir-4795-3p
hsa-mir-652-5p
hsa-mir-1275
hsa-mir-375

## Sheet: Final selection
DEGs	OVERLAPP	Gene	miRNA
SERPINH1	#N/A	PTPN4	hsa-mir-17-5p
INHBA	#N/A	ZNF721	hsa-mir-32-5p
COL1A2	#N/A	BTBD7	hsa-mir-20b-5p
CLDN1	#N/A	GNAQ	hsa-mir-92a-3p
MIR1292	#N/A	TARBP2	hsa-mir-16-5p
FAP	#N/A	NUP54	hsa-mir-19a-3p
CDH3	#N/A	ZFX	hsa-mir-218-5p
COL4A1	#N/A	LOXL2	hsa-mir-1297
TEAD4	#N/A	ZBTB34	hsa-mir-195-5p
COL6A3	#N/A	SLC25A37	hsa-mir-181d-5p
LOC101928195	#N/A	SETD1B	hsa-mir-1275
SULF1	#N/A	GIGYF1	hsa-mir-20a-5p
COL12A1	#N/A	NPAS2	hsa-mir-93-5p
COL8A1	#N/A	EHD1	hsa-mir-26b-5p
ATP11A	#N/A	PURA	hsa-mir-106b-5p
KIF26B	#N/A	HSPA1B	hsa-mir-195-5p
FN1	#N/A	PPARG	hsa-mir-130a-3p
ADAMTS2	#N/A	DDX3Y	hsa-mir-16-5p
COL1A1	#N/A	ZNF367	hsa-mir-19a-3p
PMEPA1	#N/A	SEC23IP	hsa-mir-4279
CEMIP	#N/A	CCNF	hsa-mir-1275
SPP1	#N/A	SLC7A6	hsa-mir-125b-5p
SPARC	#N/A	HAS2	hsa-mir-106a-5p
MFAP2	#N/A	WNT5A	hsa-mir-374a-5p
ADAM12	#N/A	CREBRF	hsa-mir-1297
NID2	#N/A	AKTIP	hsa-mir-93-5p
FNDC1	#N/A	ARC	hsa-mir-135b-5p
SLC39A10	#N/A	BTG3	hsa-mir-20b-5p
COL5A2	#N/A	NR2C2	hsa-mir-10a-5p
PLAU	#N/A	NR1D2	hsa-mir-27b-3p
CDH11	#N/A	PITPNB	hsa-mir-181a-5p
COL4A2	#N/A	EARS2	hsa-mir-331-3p
WISP1	#N/A	KIF23	hsa-mir-15a-5p
HOXB7	#N/A	ATP13A3	hsa-mir-15a-5p
CENPF	#N/A	CFL2	hsa-mir-301a-3p
CEBPB	#N/A	ANKH	hsa-mir-106a-5p
CTHRC1	#N/A	SLC22A23	hsa-mir-20b-5p
CDC25B	#N/A	ZBTB41	hsa-mir-126-5p
CST1	#N/A	FAM102A	hsa-mir-106b-5p
BMP1	#N/A	HOXC4	hsa-mir-331-3p
TMEM158	#N/A	CLDN12	hsa-mir-142-3p
BGN	#N/A	FAS	hsa-mir-23a-3p
THBS2	#N/A	ELK4	hsa-mir-195-5p
COL11A1	#N/A	SLC30A9	hsa-mir-342-3p
TIMP1	#N/A	NR2C2	hsa-mir-20b-5p
THY1	#N/A	NF1	hsa-mir-27a-3p
PHOSPHO2-KLHL23	#N/A	SASH1	hsa-mir-93-5p
MEST	#N/A	CRIM1	hsa-mir-18a-5p
MMP11	#N/A	SMARCA2	hsa-mir-19a-3p
FKBP10	#N/A	GOLGA2	hsa-mir-93-5p
COL10A1	#N/A	ZNF800	hsa-mir-17-5p
HOXA10	#N/A	TRAK1	hsa-mir-15a-5p
S100A10	#N/A	BRMS1L	hsa-mir-93-5p
CLEC11A	#N/A	E2F6	hsa-mir-98-5p
ASPN	#N/A	E2F2	hsa-mir-106b-5p
LOC101930489	#N/A	ANP32E	hsa-mir-92a-3p
THBS1	#N/A	NABP1	hsa-mir-26b-5p
IGFBP7	#N/A	FAM129A	hsa-mir-20b-5p
FGD6	#N/A	HPRT1	hsa-mir-301a-3p
ACTN1	#N/A	NAPG	hsa-mir-126-5p
EPPK1	#N/A	TOX	hsa-mir-223-3p
RARRES1	#N/A	ENTPD7	hsa-mir-16-5p
MELTF	#N/A	DDHD1	hsa-mir-106b-5p
LGALS1	#N/A	RRAS2	hsa-mir-23b-3p
CAMK2N1	#N/A	CREBRF	hsa-mir-15a-5p
COL5A1	#N/A	ANKH	hsa-mir-106b-5p
ZAK	#N/A	ACOX1	hsa-mir-15a-5p
TGM2	#N/A	TMEM167A	hsa-mir-106b-5p
ZNF703	#N/A	E2F5	hsa-mir-93-5p
SULF2	#N/A	TRIM44	hsa-mir-21-3p
COL3A1	#N/A	TLK1	hsa-mir-195-5p
RAB31	#N/A	RSBN1	hsa-mir-32-5p
SGO2	#N/A	FAM126B	hsa-mir-106b-5p
UPP1	#N/A	APAF1	hsa-mir-23a-3p
SPHK1	#N/A	FZD3	hsa-mir-98-5p
ULBP2	#N/A	HMGB1	hsa-mir-142-3p
APOC1	#N/A	SNX4	hsa-mir-218-5p
PDPN	#N/A	ZNF385A	hsa-mir-125b-5p
GPNMB	#N/A	NUP43	hsa-mir-32-5p
BAG2	#N/A	CBX5	hsa-mir-98-5p
ITGA5	#N/A	NR1D2	hsa-mir-27a-3p
SPOCK1	#N/A	SEC24A	hsa-mir-16-5p
CST2	#N/A	CLN8	hsa-mir-377-3p
SFRP4	#N/A	FBXO21	hsa-mir-20b-5p
MIR4435-2HG	#N/A	ERAP1	hsa-mir-93-5p
KRT80	#N/A	RAB22A	hsa-mir-93-5p
S100A4	#N/A	SAMD8	hsa-mir-143-3p
LEF1	#N/A	ZNF367	hsa-mir-18b-5p
PRRX1	EDNRA	EDNRA	hsa-mir-27b-3p
GPR161	#N/A	LIMK1	hsa-mir-20b-5p
FLNA	#N/A	LIMD1	hsa-mir-24-3p
NRP2	#N/A	ZBTB4	hsa-mir-301a-3p
IGF2BP3	#N/A	RNF182	hsa-mir-27a-3p
OLFML2B	#N/A	CPOX	hsa-mir-17-5p
MDFI	#N/A	NUFIP2	hsa-mir-92a-3p
PLPPR4	#N/A	F3	hsa-mir-106a-5p
P3H4	#N/A	STX6	hsa-mir-20b-5p
APOE	#N/A	FKBP1A	hsa-mir-374b-5p
LOC101928916	#N/A	TNPO1	hsa-mir-181b-5p
FZD2	#N/A	RAD23B	hsa-mir-106a-5p
AMIGO2	#N/A	PHF13	hsa-mir-19a-3p
CST4	#N/A	STMN3	hsa-mir-1275
CMTM3	#N/A	ELMSAN1	hsa-mir-181b-5p
PDLIM7	#N/A	MTMR3	hsa-mir-93-5p
LZTS1	#N/A	CEP170	hsa-mir-454-3p
PCSK5	#N/A	NUFIP2	hsa-mir-145-5p
WDR72	#N/A	DDX3X	hsa-mir-92a-3p
CHSY3	#N/A	HSP90B1	hsa-mir-148a-3p
EDNRA	#N/A	GNB5	hsa-mir-20a-5p
FBN1	#N/A	HMGB3	hsa-mir-93-5p
FANCB	#N/A	PPP1R15B	hsa-mir-301a-3p
CPXM1	#N/A	CHEK1	hsa-mir-15a-5p
SRPX2	#N/A	EIF5	hsa-mir-27b-3p
LOC101928269	#N/A	MAP3K9	hsa-mir-130a-3p
COL6A1	#N/A	TBL1XR1	hsa-mir-195-5p
RIN3	#N/A	MAPK8	hsa-mir-92a-3p
VCAN	#N/A	ZBTB47	hsa-mir-18a-5p
EHD2	#N/A	PM20D2	hsa-mir-21-5p
ANTXR1	#N/A	DUSP2	hsa-mir-106a-5p
PLXDC2	#N/A	CYTH4	hsa-mir-331-3p
PYM1	#N/A	CNEP1R1	hsa-mir-92a-3p
GIF	#N/A	METAP2	hsa-mir-26b-5p
CWH43	#N/A	SHOC2	hsa-mir-93-5p
ATP4B	#N/A	C14orf28	hsa-mir-20a-5p
ATP4A	#N/A	RCCD1	hsa-mir-17-5p
MAL	#N/A	PDCD6IP	hsa-mir-15a-5p
CAPN9	#N/A	C2orf42	hsa-mir-195-5p
TRIM50	#N/A	RAD23B	hsa-mir-15a-5p
RAB27A	#N/A	USP28	hsa-mir-92a-3p
PSAPL1	#N/A	SLC45A3	hsa-mir-218-5p
GATA6-AS1	#N/A	MCC	hsa-mir-93-5p
ESRRG	#N/A	TULP4	hsa-mir-32-5p
KCNJ16	#N/A	PRDM2	hsa-mir-145-5p
CYP2C9	#N/A	ACVR2B	hsa-mir-374b-5p
ABCC5	#N/A	BAZ2B	hsa-mir-92a-3p
MIR29C	#N/A	LPGAT1	hsa-mir-17-5p
SIDT2	#N/A	ZC3H12C	hsa-mir-106b-5p
CCKBR	#N/A	NUFIP2	hsa-mir-23a-3p
FBP2	#N/A	BNIP2	hsa-mir-17-5p
GHRL	#N/A	CCDC6	hsa-mir-218-5p
ADH7	#N/A	FAM46C	hsa-mir-93-5p
FAM20A	#N/A	STRADB	hsa-mir-195-5p
RDH12	#N/A	PEX12	hsa-mir-195-5p
SMIM5	#N/A	ACVR1B	hsa-mir-135b-5p
YIF1B	#N/A	ZNF641	hsa-mir-214-3p
ADRB2	#N/A	GOLGA8A	hsa-mir-32-5p
CHGA	#N/A	ZCCHC3	hsa-mir-196a-5p
AQP4	#N/A	FRYL	hsa-mir-16-5p
KCNE2	#N/A	COMMD2	hsa-mir-143-3p
SLC7A8	#N/A	RPS6KA5	hsa-mir-27a-3p
LINC00982	#N/A	EEA1	hsa-mir-93-5p
UBL3	#N/A	ITCH	hsa-mir-106b-5p
SCNN1B	#N/A	RBM20	hsa-mir-454-3p
MYOC	#N/A	TNRC6B	hsa-mir-15a-5p
TRIM74	#N/A	ESR1	hsa-mir-19a-3p
ACER2	#N/A	YWHAH	hsa-mir-16-5p
RNASE1	#N/A	NEURL1B	hsa-mir-27b-3p
PPID	#N/A	TMEM138	hsa-mir-93-5p
MFSD4A	#N/A	GHITM	hsa-mir-218-5p
GPX3	#N/A	BCL2L12	hsa-mir-455-3p
TPCN2	#N/A	CNBP	hsa-mir-374c-5p
VSIG2	#N/A	FAM57A	hsa-mir-17-5p
CPA2	#N/A	PCMT1	hsa-mir-15a-5p
SCNN1G	#N/A	GSK3B	hsa-mir-1297
GKN2	#N/A	ANKRD40	hsa-mir-27a-3p
SOSTDC1	#N/A	BRMS1L	hsa-mir-20b-5p
STX12	#N/A	LAPTM4A	hsa-mir-17-5p
FGD4	#N/A	FBXO11	hsa-mir-181d-5p
PDGFD	#N/A	KCTD21	hsa-mir-98-5p
LIPF	#N/A	KRBOX4	hsa-mir-181a-5p
CAPN13	#N/A	PGM2L1	hsa-mir-20a-5p
TMEM116	#N/A	SHOC2	hsa-mir-374b-5p
AKR7A3	#N/A	PSME3	hsa-mir-3175
HPGD	#N/A	LPAR2	hsa-mir-4324
LYPD6B	#N/A	MAP3K8	hsa-mir-17-5p
DGKD	#N/A	PCDHA4	hsa-mir-181a-5p
CYSTM1	#N/A	MCFD2	hsa-mir-23b-3p
SLC16A7	#N/A	RMND5A	hsa-mir-27a-3p
SMIM6	#N/A	SMOC1	hsa-mir-20b-5p
CKMT2	#N/A	PNPLA8	hsa-mir-218-5p
GPR155	#N/A	NETO2	hsa-mir-106b-5p
KCNJ15	#N/A	SLC7A11	hsa-mir-26b-5p
SLC41A2	#N/A	CEP170	hsa-mir-20b-5p
SH3GL2	#N/A	IPO8	hsa-mir-218-5p
SLC26A9	#N/A	ARHGAP1	hsa-mir-20b-5p
B4GALNT3	#N/A	FRMD4B	hsa-mir-98-5p
PKIB	#N/A	GRAMD3	hsa-mir-195-5p
PBLD	#N/A	DCUN1D4	hsa-mir-27a-3p
METTL7A	#N/A	CEP55	hsa-mir-301a-3p
ADTRP	#N/A	ZFP36L1	hsa-mir-181d-5p
TMEM220	#N/A	KIAA0922	hsa-mir-106a-5p
SYTL2	#N/A	NUP43	hsa-mir-92a-3p
FA2H	#N/A	C6orf120	hsa-mir-106b-5p
CYP3A43	#N/A	BACH1	hsa-mir-142-3p
APOBEC2	#N/A	G6PC	hsa-mir-4284
MYRF	#N/A	BZW1	hsa-mir-15a-5p
MT1G	#N/A	APBB2	hsa-mir-93-5p
RPS6KA6	#N/A	HADHB	hsa-mir-454-3p
ALDH6A1	#N/A	ACBD5	hsa-mir-19a-3p
ASPA	#N/A	FAT3	hsa-mir-16-5p
ADGRG2	#N/A	FOXJ2	hsa-mir-17-5p
MYZAP	#N/A	RALA	hsa-mir-140-5p
MAGI3	#N/A	2018-09-02	hsa-mir-15a-5p
KIT	#N/A	PEX12	hsa-mir-16-5p
CKM	#N/A	CRISPLD2	hsa-mir-665
SIGLEC11	#N/A	RGL2	hsa-mir-142-3p
MT1M	#N/A	NFIA	hsa-mir-223-3p
AKR1B10	#N/A	TRPC3	hsa-mir-301a-3p
FAM150B	#N/A	BTLA	hsa-mir-103a-3p
DNER	#N/A	TMEM167A	hsa-mir-28-5p
VSTM2A	#N/A	PEX13	hsa-mir-374c-5p
B3GNT6	#N/A	ARC	hsa-mir-19a-3p
SULT1B1	#N/A	RLIM	hsa-mir-106b-5p
DHRS7	#N/A	FAM122B	hsa-mir-15a-5p
SGK1	#N/A	LHFPL2	hsa-mir-32-5p
LIFR	#N/A	ZBTB5	hsa-mir-195-5p
ZNF664-FAM101A	#N/A	DDX3X	hsa-mir-181a-5p
PDILT	#N/A	MAP3K4	hsa-mir-199a-3p
ARHGEF28	#N/A	CAMSAP2	hsa-mir-301a-3p
CHIA	#N/A	C11orf24	hsa-mir-195-5p
ZNF385B	#N/A	ANKRD33B	hsa-mir-106b-5p
ENPP6	#N/A	EIF5A2	hsa-mir-106b-5p
LOC400043	#N/A	OSBPL3	hsa-mir-16-5p
RASSF6	#N/A	KMT2C	hsa-mir-27a-3p
GRAMD1C	#N/A	MSMO1	hsa-mir-19a-3p
LINC00675	#N/A	FAS	hsa-mir-98-5p
HDC	#N/A	TNS1	hsa-mir-4279
ETNPPL	#N/A	PLS1	hsa-mir-93-5p
NKX2-3	#N/A	PCMT1	hsa-mir-195-5p
CA9	#N/A	RASEF	hsa-mir-218-5p
GATA5	#N/A	KLF10	hsa-mir-20b-5p
PLA2G1B	#N/A	NME6	hsa-mir-98-5p
ALDH3A1	#N/A	TAF8	hsa-mir-4284
ADAM28	#N/A	ZFYVE9	hsa-mir-4328
VSIG1	#N/A	FAM177A1	hsa-mir-1297
NTN4	#N/A	JAK1	hsa-mir-20b-5p
FBXL13	#N/A	PTGFRN	hsa-mir-106a-5p
HIPK2	#N/A	USP3	hsa-mir-195-5p
DPCR1	#N/A	ACVR2A	hsa-mir-16-5p
LINC01105	#N/A	LRP8	hsa-mir-377-3p
RNASE4	#N/A	MAPK9	hsa-mir-106b-5p
UBE2QL1	#N/A	ATAD2	hsa-mir-20a-5p
NOSTRIN	#N/A	SEMA7A	hsa-mir-20a-5p
LOC101926959	#N/A	RFX7	hsa-mir-454-3p
LDHD	#N/A	RMND5A	hsa-mir-342-3p
PACRG	#N/A	IVNS1ABP	hsa-mir-195-5p
GRIA4	#N/A	SNX17	hsa-mir-19a-3p
SLC1A2	#N/A	REEP3	hsa-mir-106b-5p
ADHFE1	#N/A	RARB	hsa-mir-195-5p
CLIC6	#N/A	INMT	hsa-mir-24-3p
KCNJ13	#N/A	CHIC1	hsa-mir-195-5p
ELOVL6	#N/A	SALL1	hsa-mir-103a-3p
ASCL1	#N/A	RCBTB1	hsa-mir-26b-5p
RAB27B	#N/A	TRIM23	hsa-mir-27b-3p
MESP2	#N/A	PLAG1	hsa-mir-15a-5p
CYP2C18	#N/A	ZNF691	hsa-mir-16-5p
BHLHA15	#N/A	PLIN3	hsa-mir-24-3p
NEDD4L	#N/A	TRIM36	hsa-mir-92a-3p
CNTN3	#N/A	B4GALT1	hsa-mir-15a-5p
CA2	#N/A	OSTM1	hsa-mir-93-5p
UGT2B15	#N/A	OSBPL3	hsa-mir-181d-5p
GKN1	#N/A	ABCG2	hsa-mir-4539
PPFIBP2	#N/A	PRDM1	hsa-mir-125b-5p
TMEM161B	#N/A	RAB11FIP1	hsa-mir-93-5p
PGC	#N/A	CCDC71L	hsa-mir-20b-5p
MT1F	#N/A	PLEKHO2	hsa-mir-17-5p
PLLP	#N/A	REPS2	hsa-mir-4284
CD36	#N/A	YIPF4	hsa-mir-92a-3p
TMED6	#N/A	NUP35	hsa-mir-17-5p
SPINK2	#N/A	ATAD2	hsa-mir-20b-5p
SPINK7	#N/A	CEP55	hsa-mir-148a-3p
SSTR1	#N/A	KPNA6	hsa-mir-374c-5p
PP7080	#N/A	TSG101	hsa-mir-93-5p
FOLR1	#N/A	MYL12A	hsa-mir-1275
C1orf116	#N/A	ZNRF2	hsa-mir-4328
RGMB	#N/A	GNS	hsa-mir-106a-5p
CXCL17	#N/A	MSMO1	hsa-mir-26b-5p
PXMP2	#N/A	KMT2B	hsa-mir-17-5p
OASL	#N/A	MAPK1	hsa-mir-20b-5p
GPRC5C	#N/A	SOCS6	hsa-mir-23b-3p
GSTA3	#N/A	KIAA0513	hsa-mir-93-5p
CYB5R1	#N/A	TRIO	hsa-mir-32-5p
MUC5AC	#N/A	TMEM123	hsa-mir-20a-5p
IQGAP2	#N/A	MAP2	hsa-mir-335-5p
GUCA2B	#N/A	CELF1	hsa-mir-4279
SLC2A12	#N/A	CALD1	hsa-mir-21-5p
COBLL1	#N/A	WDR37	hsa-mir-20b-5p
IL19	#N/A	WNK1	hsa-mir-1297
ZNF169	#N/A	MDM2	hsa-mir-145-5p
GCNT2	#N/A	MAP2K4	hsa-mir-92a-3p
ACKR4	#N/A	RAB10	hsa-mir-106b-5p
MT1E	#N/A	SKIL	hsa-mir-17-5p
CSHL1	#N/A	POU6F1	hsa-mir-4279
KIAA2022	#N/A	ZDHHC7	hsa-mir-19a-3p
AZGP1	#N/A	RABEP1	hsa-mir-106b-5p
FGA	#N/A	ESR1	hsa-mir-130a-3p
WIPF3	#N/A	C6orf106	hsa-mir-3175
FMO5	#N/A	TM9SF3	hsa-mir-181a-5p
CYP3A5	#N/A	POLR3D	hsa-mir-24-3p
SEPP1	#N/A	CAMTA1	hsa-mir-106b-5p
PPP4R4	#N/A	GGA3	hsa-mir-98-5p
FAM167A-AS1	#N/A	SEC24A	hsa-mir-27a-3p
OLMALINC	#N/A	LIN28A	hsa-mir-125b-5p
AZGP1P1	#N/A	VAPB	hsa-mir-4797-5p
MAATS1	#N/A	SETD5	hsa-mir-32-5p
ANGPTL3	#N/A	CANX	hsa-mir-374c-5p
EPB41L4B	#N/A	TNPO1	hsa-mir-23b-3p
ZBTB7C	#N/A	SOX6	hsa-mir-19a-3p
SGK2	#N/A	SPG20	hsa-mir-454-3p
DKFZP434K028	#N/A	CRIM1	hsa-mir-16-5p
PM20D1	#N/A	UBE2A	hsa-mir-19a-3p
CNTD1	#N/A	ITGB8	hsa-mir-17-5p
ESRRB	#N/A	GRAMD3	hsa-mir-32-5p
ALDH1A1	#N/A	LAMC1	hsa-mir-15a-5p
SH3BGRL2	#N/A	RAB11FIP1	hsa-mir-106a-5p
KLHDC7A	#N/A	PRUNE2	hsa-mir-301a-3p
PDK4	#N/A	TWF1	hsa-mir-106b-5p
CHAD	#N/A	PTPRD	hsa-mir-16-5p
PELI2	#N/A	GNPTAB	hsa-mir-98-5p
EPN3	#N/A	CENPQ	hsa-mir-106b-5p
ANG	#N/A	RALGPS2	hsa-mir-21-5p
LOC100506870	#N/A	RAB14	hsa-mir-301a-3p
LOC100419741	#N/A	REST	hsa-mir-4324
COL2A1	#N/A	RAF1	hsa-mir-195-5p
SULT2A1	#N/A	FAM210A	hsa-mir-17-5p
TMEM92	#N/A	PIGA	hsa-mir-454-3p
KIAA1324	#N/A	PGM2L1	hsa-mir-20b-5p
PPP1R36	#N/A	TGFBR1	hsa-mir-140-5p
IFNL2	#N/A	SOX11	hsa-mir-92a-3p
TEX9	#N/A	DUSP6	hsa-mir-4328
DRD5	#N/A	FAXC	hsa-mir-26b-5p
IGFALS	#N/A	LPCAT3	hsa-mir-3175
TMEM171	#N/A	ARL8B	hsa-mir-148a-3p
LOC101927263	#N/A	DUSP2	hsa-mir-20a-5p
AKR1C3	#N/A	YY1	hsa-mir-130a-3p
DCAF12L1	#N/A	TET3	hsa-mir-20a-5p
NRG4	#N/A	SERTAD3	hsa-mir-92a-3p
CYP2S1	#N/A	MTUS1	hsa-mir-98-5p
ACADL	#N/A	CAMSAP2	hsa-mir-454-3p
TMPRSS2	#N/A	NAPG	hsa-mir-15a-5p
CCBE1	#N/A	GIGYF1	hsa-mir-181a-5p
FRMD1	#N/A	SCN8A	hsa-mir-377-3p
FNDC5	#N/A	MOB1B	hsa-mir-19a-3p
ALDOB	#N/A	TMEM59	hsa-mir-142-3p
GRIA3	#N/A	KIF21A	hsa-mir-145-5p
SH3RF2	#N/A	TRAPPC6B	hsa-mir-4797-5p
LINC01314	#N/A	TNRC6A	hsa-mir-26b-5p
SMPD3	#N/A	TNPO1	hsa-mir-32-5p
MAOA	#N/A	ELK4	hsa-mir-20a-5p
PCAT18	#N/A	ENO4	hsa-mir-143-3p
GRIP2	#N/A	FURIN	hsa-mir-24-3p
MAGI1	#N/A	HSBP1	hsa-mir-374b-5p
PTCRA	#N/A	B3GNT2	hsa-mir-16-5p
GUCA1C	#N/A	CHAC1	hsa-mir-26b-5p
LOC284578	#N/A	TRIM35	hsa-mir-195-5p
PNLIPRP2	#N/A	NFAT5	hsa-mir-20a-5p
LOC202181	#N/A	VPS4A	hsa-mir-15a-5p
RNF128	#N/A	ZNF800	hsa-mir-27b-3p
CA4	#N/A	VPS33B	hsa-mir-16-5p
EDDM3A	#N/A	ZFHX3	hsa-mir-27b-3p
PROSER2-AS1	#N/A	CAB39	hsa-mir-103a-3p
LOC101928881	#N/A	SMARCE1	hsa-mir-103a-3p
NFE2L2	#N/A	NOL9	hsa-mir-4284
KNG1	#N/A	RAPGEF4	hsa-mir-93-5p
TTC6	#N/A	IGF1R	hsa-mir-1275
ADA	#N/A	GOLGA8J	hsa-mir-92a-3p
	#N/A	FAM57A	hsa-mir-106b-5p
	#N/A	PPP6R1	hsa-mir-301a-3p
	#N/A	PCDHA13	hsa-mir-181a-5p
	#N/A	PFKP	hsa-mir-17-5p
	#N/A	FNDC3B	hsa-mir-92a-3p
	#N/A	ZFHX3	hsa-mir-27a-3p
	#N/A	WDR20	hsa-mir-19a-3p
	#N/A	KIF3B	hsa-mir-195-5p
	#N/A	IDH3A	hsa-mir-16-5p
	#N/A	PAFAH1B2	hsa-mir-195-5p
	#N/A	EXOC5	hsa-mir-32-5p
	TMEM161B	TMEM161B	hsa-mir-195-5p
	#N/A	KRBOX4	hsa-mir-181d-5p
	#N/A	CCSER2	hsa-mir-32-5p
	#N/A	SRSF2	hsa-mir-93-5p
	#N/A	ATG14	hsa-mir-93-5p
	#N/A	ZNF449	hsa-mir-195-5p
	#N/A	SIRT1	hsa-mir-181b-5p
	#N/A	CNOT7	hsa-mir-19a-3p
	#N/A	E2F1	hsa-mir-93-5p
	#N/A	BTRC	hsa-mir-16-5p
	#N/A	LYSMD3	hsa-mir-93-5p
	#N/A	DNALI1	hsa-mir-665
	#N/A	PPP1R12C	hsa-mir-92a-3p
	#N/A	IGDCC4	hsa-mir-196a-5p
	#N/A	SCAMP5	hsa-mir-20b-5p
	#N/A	ZNF367	hsa-mir-21-5p
	ITGA5	ITGA5	hsa-mir-148a-3p
	#N/A	TAX1BP1	hsa-mir-143-5p
	#N/A	YIPF6	hsa-mir-15a-5p
	#N/A	PNRC2	hsa-mir-23c
	#N/A	EZH1	hsa-mir-17-5p
	#N/A	ATG14	hsa-mir-17-5p
	#N/A	TMED7	hsa-mir-23c
	#N/A	OSTM1	hsa-mir-20b-5p
	#N/A	ACSL4	hsa-mir-20b-5p
	#N/A	KPNA2	hsa-mir-17-5p
	#N/A	GSKIP	hsa-mir-181d-5p
	#N/A	HEPHL1	hsa-mir-181a-5p
	#N/A	TBC1D15	hsa-mir-17-5p
	#N/A	NUFIP2	hsa-mir-15a-5p
	#N/A	OTUD7B	hsa-mir-218-5p
	#N/A	RLF	hsa-mir-181d-5p
	#N/A	GNS	hsa-mir-93-5p
	#N/A	PLEKHO2	hsa-mir-20a-5p
	#N/A	PIK3R1	hsa-mir-16-5p
	#N/A	SPIRE1	hsa-mir-374c-5p
	#N/A	EBAG9	hsa-mir-4661-5p
	#N/A	GINS4	hsa-mir-106b-5p
	#N/A	KPNA1	hsa-mir-181d-5p
	#N/A	RUFY2	hsa-mir-20b-5p
	#N/A	POM121C	hsa-mir-23b-3p
	#N/A	EIF4G2	hsa-mir-106a-5p
	#N/A	PTBP3	hsa-mir-4268
	#N/A	CBY1	hsa-mir-454-3p
	#N/A	SCML2	hsa-mir-24-3p
	#N/A	E2F7	hsa-mir-27b-3p
	#N/A	PLAG1	hsa-mir-195-5p
	#N/A	TEX2	hsa-mir-32-5p
	#N/A	SMAD2	hsa-mir-148a-3p
	#N/A	MAP3K3	hsa-mir-181a-5p
	#N/A	SLC5A6	hsa-mir-98-5p
	#N/A	PKP1	hsa-mir-4328
	#N/A	SEMA4B	hsa-mir-106b-5p
	#N/A	GOLM1	hsa-mir-145-5p
	#N/A	ZDHHC18	hsa-mir-1297
	#N/A	YTHDF1	hsa-mir-374c-5p
	#N/A	BCL7A	hsa-mir-24-3p
	#N/A	COL16A1	hsa-mir-181a-5p
	#N/A	CAPRIN2	hsa-mir-17-5p
	#N/A	LASP1	hsa-mir-17-5p
	#N/A	GAB1	hsa-mir-20b-5p
	#N/A	DPYSL2	hsa-mir-301a-3p
	#N/A	HIVEP1	hsa-mir-92a-3p
	#N/A	TMEM9B	hsa-mir-148a-3p
	#N/A	MAPK1	hsa-mir-214-3p
	#N/A	KPNA6	hsa-mir-19a-3p
	#N/A	AHCYL2	hsa-mir-16-5p
	#N/A	TSPAN12	hsa-mir-140-5p
	#N/A	CHAF1A	hsa-mir-20b-5p
	#N/A	SON	hsa-mir-16-5p
	#N/A	RAB11FIP1	hsa-mir-20a-5p
	#N/A	NCOA3	hsa-mir-17-5p
	PLAU	PLAU	hsa-mir-193a-3p
	#N/A	AGFG1	hsa-mir-103a-3p
	#N/A	USP32	hsa-mir-301a-3p
	#N/A	PKNOX1	hsa-mir-17-5p
	#N/A	DUSP8	hsa-mir-21-5p
	#N/A	GNAQ	hsa-mir-32-5p
	#N/A	RRAGD	hsa-mir-17-5p
	#N/A	CCNK	hsa-mir-27a-3p
	#N/A	WDR26	hsa-mir-19a-3p
	#N/A	CAPZA2	hsa-mir-15a-5p
	#N/A	PPP1R15B	hsa-mir-130a-3p
	#N/A	NDST1	hsa-mir-24-3p
	#N/A	DYNC1LI2	hsa-mir-106a-5p
	#N/A	PPP3CA	hsa-mir-145-5p
	#N/A	SERINC5	hsa-mir-145-5p
	#N/A	RGPD4	hsa-mir-27b-3p
	#N/A	MTMR12	hsa-mir-21-5p
	#N/A	EIF5A2	hsa-mir-125b-5p
	#N/A	YOD1	hsa-mir-21-5p
	#N/A	CCSER2	hsa-mir-20a-5p
	#N/A	CPEB3	hsa-mir-92a-3p
	#N/A	TMEM64	hsa-mir-20b-5p
	#N/A	SEC24A	hsa-mir-195-5p
	#N/A	LPAR1	hsa-mir-23a-3p
	#N/A	PNRC2	hsa-mir-23a-3p
	#N/A	CHIC1	hsa-mir-20a-5p
	#N/A	EIF3A	hsa-mir-16-5p
	#N/A	SESN3	hsa-mir-92a-3p
	#N/A	REST	hsa-mir-20b-5p
	#N/A	DNAJB9	hsa-mir-20a-5p
	#N/A	ZCCHC2	hsa-mir-23b-3p
	#N/A	BICD2	hsa-mir-17-5p
	#N/A	PPP1R3B	hsa-mir-20b-5p
	#N/A	FEM1C	hsa-mir-20a-5p
	#N/A	RPRD1A	hsa-mir-10a-5p
	#N/A	PHKA1	hsa-mir-15a-5p
	#N/A	ELMOD2	hsa-mir-19a-3p
	#N/A	NUS1	hsa-mir-1297
	#N/A	SEMA4B	hsa-mir-93-5p
	#N/A	UBXN2A	hsa-mir-106b-5p
	#N/A	VMA21	hsa-mir-18a-5p
	#N/A	UBE2H	hsa-mir-335-5p
	#N/A	RAB10	hsa-mir-4797-5p
	#N/A	SLC12A7	hsa-mir-301a-3p
	#N/A	OLIG3	hsa-mir-335-5p
	#N/A	NIPA1	hsa-mir-454-3p
	#N/A	WAC	hsa-mir-20a-5p
	#N/A	PIM1	hsa-mir-15a-5p
	#N/A	TLK1	hsa-mir-103a-3p
	#N/A	PARD6B	hsa-mir-20a-5p
	#N/A	VPS54	hsa-mir-32-5p
	#N/A	HMGA2	hsa-mir-196a-5p
	#N/A	JMY	hsa-mir-454-3p
	#N/A	BRMS1L	hsa-mir-17-5p
	#N/A	NRBF2	hsa-mir-454-3p
	#N/A	SESN3	hsa-mir-374c-5p
	#N/A	WIPI2	hsa-mir-16-5p
	#N/A	ZFP36L2	hsa-mir-181a-5p
	#N/A	SPATS2L	hsa-mir-103a-3p
	#N/A	MSMO1	hsa-mir-106a-5p
	#N/A	KIF3B	hsa-mir-181d-5p
	#N/A	RAB8B	hsa-mir-92a-3p
	#N/A	CNOT7	hsa-mir-20b-5p
	#N/A	SOS1	hsa-mir-27a-3p
	#N/A	MAPK6	hsa-mir-98-5p
	#N/A	NEK6	hsa-mir-23a-3p
	#N/A	NRIP3	hsa-mir-20a-5p
	#N/A	GPATCH8	hsa-mir-148a-3p
	SGK1	SGK1	hsa-mir-19a-3p
	#N/A	CAMSAP2	hsa-mir-374b-5p
	#N/A	TWF1	hsa-mir-18b-5p
	#N/A	QSER1	hsa-mir-23b-3p
	#N/A	PPM1D	hsa-mir-4284
	#N/A	RAB5B	hsa-mir-93-5p
	#N/A	SIX2	hsa-mir-181b-5p
	#N/A	TWF1	hsa-mir-92a-3p
	#N/A	KLK10	hsa-mir-140-5p
	RGMB	RGMB	hsa-mir-93-5p
	#N/A	PIGW	hsa-mir-374b-5p
	#N/A	KIAA1191	hsa-mir-93-5p
	#N/A	CTNNB1	hsa-mir-214-3p
	#N/A	CLOCK	hsa-mir-142-3p
	#N/A	RAB1B	hsa-mir-103a-3p
	#N/A	FYCO1	hsa-mir-142-3p
	#N/A	YOD1	hsa-mir-106a-5p
	#N/A	FNIP1	hsa-mir-92a-3p
	#N/A	CREBBP	hsa-mir-4328
	#N/A	IFT74	hsa-mir-16-5p
	#N/A	MMGT1	hsa-mir-23b-3p
	#N/A	VPS26A	hsa-mir-17-5p
	#N/A	SACS	hsa-mir-20a-5p
	#N/A	YOD1	hsa-mir-20a-5p
	#N/A	NR3C1	hsa-mir-374b-5p
	#N/A	THSD4	hsa-mir-1275
	#N/A	EIF4EBP1	hsa-mir-125b-5p
	#N/A	USP3	hsa-mir-15a-5p
	#N/A	FGFR3	hsa-mir-100-5p
	#N/A	E2F7	hsa-mir-1297
	#N/A	ANKRD52	hsa-mir-17-5p
	#N/A	NETO2	hsa-mir-106a-5p
	#N/A	CAPN15	hsa-mir-17-5p
	#N/A	CPEB2	hsa-mir-32-5p
	#N/A	FZD5	hsa-mir-374a-5p
	#N/A	FAM172A	hsa-mir-218-5p
	#N/A	DPYSL2	hsa-mir-20a-5p
	#N/A	CHIC1	hsa-mir-15a-5p
	#N/A	RASSF2	hsa-mir-16-5p
	#N/A	ATXN7L3	hsa-mir-16-5p
	#N/A	PARD6B	hsa-mir-374a-5p
	#N/A	KIAA1191	hsa-mir-17-5p
	#N/A	HBP1	hsa-mir-93-5p
	#N/A	BMPR2	hsa-mir-17-5p
	#N/A	BRWD1	hsa-mir-23b-3p
	#N/A	DNAJB9	hsa-mir-93-5p
	#N/A	CCNT1	hsa-mir-195-5p
	#N/A	RHOB	hsa-mir-223-3p
	#N/A	DMTF1	hsa-mir-195-5p
	#N/A	PHKA1	hsa-mir-195-5p
	#N/A	EPHA4	hsa-mir-10b-5p
	#N/A	E2F1	hsa-mir-20a-5p
	#N/A	NR2C2	hsa-mir-10b-5p
	#N/A	WWTR1	hsa-mir-374b-5p
	#N/A	NAA50	hsa-mir-181b-5p
	#N/A	PAN3	hsa-mir-21-5p
	#N/A	BTG3	hsa-mir-4797-5p
	#N/A	TOPORS	hsa-mir-20a-5p
	#N/A	REEP3	hsa-mir-17-5p
	#N/A	CAV1	hsa-mir-199a-5p
	#N/A	CBX4	hsa-mir-181d-5p
	#N/A	SOX4	hsa-mir-32-5p
	#N/A	COX20	hsa-mir-32-5p
	#N/A	BBX	hsa-mir-106b-5p
	#N/A	NRIP3	hsa-mir-106b-5p
	#N/A	AGO2	hsa-mir-21-5p
	#N/A	LAMTOR3	hsa-mir-16-5p
	#N/A	KPNA2	hsa-mir-93-5p
	#N/A	CREB3L2	hsa-mir-92a-3p
	#N/A	HIP1	hsa-mir-93-5p
	#N/A	VMA21	hsa-mir-18b-5p
	#N/A	PDIA6	hsa-mir-16-5p
	#N/A	CLDN12	hsa-mir-98-5p
	#N/A	RBM43	hsa-mir-4328
	#N/A	RNF111	hsa-mir-19a-3p
	#N/A	PHC3	hsa-mir-93-5p
	#N/A	SET	hsa-mir-4328
	#N/A	RBM27	hsa-mir-143-3p
	#N/A	TET3	hsa-mir-1297
	#N/A	SAR1A	hsa-mir-18b-5p
	#N/A	BIRC6	hsa-mir-218-5p
	#N/A	GPAM	hsa-mir-93-5p
	#N/A	ZFYVE1	hsa-mir-125b-5p
	#N/A	CRIPT	hsa-mir-24-3p
	#N/A	ABCC6	hsa-mir-1275
	#N/A	CAPN15	hsa-mir-20b-5p
	#N/A	C21orf91	hsa-mir-92a-3p
	#N/A	ITSN2	hsa-mir-27b-3p
	#N/A	CEP350	hsa-mir-19a-3p
	#N/A	AHI1	hsa-mir-218-5p
	#N/A	HMGN2	hsa-mir-23a-3p
	#N/A	TXLNA	hsa-mir-17-5p
	#N/A	NUP35	hsa-mir-20a-5p
	#N/A	NFIB	hsa-mir-21-5p
	#N/A	C11orf24	hsa-mir-15a-5p
	#N/A	VPS37A	hsa-mir-19a-3p
	#N/A	ANKRD12	hsa-mir-93-5p
	#N/A	TROVE2	hsa-mir-27a-3p
	#N/A	CDCA4	hsa-mir-195-5p
	#N/A	CTNS	hsa-mir-1297
	#N/A	ICK	hsa-mir-943
	#N/A	PLOD2	hsa-mir-26b-5p
	#N/A	ACOT2	hsa-mir-665
	#N/A	RRAGD	hsa-mir-301a-3p
	#N/A	MTF1	hsa-mir-106b-5p
	#N/A	CCDC71L	hsa-mir-20a-5p
	#N/A	USP3	hsa-mir-93-5p
	#N/A	MAP3K11	hsa-mir-199a-5p
	#N/A	KIF3B	hsa-mir-16-5p
	#N/A	FBXO17	hsa-mir-660-3p
	#N/A	WIPI2	hsa-mir-15a-5p
	#N/A	TRIM37	hsa-mir-130a-3p
	#N/A	SIKE1	hsa-mir-106b-5p
	#N/A	ATP6V1B2	hsa-mir-16-5p
	#N/A	RBM12B	hsa-mir-93-5p
	#N/A	DDX5	hsa-mir-17-5p
	#N/A	ARHGAP1	hsa-mir-19a-3p
	#N/A	PDE4D	hsa-mir-18b-5p
	#N/A	NEK3	hsa-mir-98-5p
	#N/A	ACSL4	hsa-mir-93-5p
	#N/A	RBM20	hsa-mir-20b-5p
	#N/A	RORA	hsa-mir-20a-5p
	#N/A	HIVEP1	hsa-mir-32-5p
	#N/A	CDC34	hsa-mir-98-5p
	#N/A	GSE1	hsa-mir-27b-3p
	#N/A	USP13	hsa-mir-301a-3p
	#N/A	NKIRAS1	hsa-mir-106b-5p
	#N/A	CLIP1	hsa-mir-454-3p
	#N/A	PCDHA7	hsa-mir-181a-5p
	#N/A	DNAJC9	hsa-mir-342-3p
	#N/A	MTFR1L	hsa-mir-16-5p
	#N/A	SIKE1	hsa-mir-17-5p
	#N/A	SOWAHC	hsa-mir-16-5p
	#N/A	PIP4K2A	hsa-mir-93-5p
	#N/A	TGFBR2	hsa-mir-17-5p
	#N/A	FRMD6	hsa-mir-20a-5p
	#N/A	ANKRD13C	hsa-mir-106b-5p
	#N/A	EYA4	hsa-mir-27b-3p
	#N/A	PNPLA6	hsa-mir-214-3p
	#N/A	CCSER2	hsa-mir-20b-5p
	#N/A	DDX3Y	hsa-mir-195-5p
	#N/A	SLC9A1	hsa-mir-331-3p
	#N/A	UBR3	hsa-mir-26b-5p
	#N/A	AFF1	hsa-mir-660-3p
	#N/A	RBBP6	hsa-mir-15a-5p
	#N/A	SPANXN5	hsa-mir-660-3p
	#N/A	MTHFR	hsa-mir-16-5p
	#N/A	KIF23	hsa-mir-103a-3p
	#N/A	CIT	hsa-mir-20a-5p
	#N/A	SIK1	hsa-mir-93-5p
	#N/A	ZNF644	hsa-mir-98-5p
	#N/A	CDC42BPA	hsa-mir-218-5p
	#N/A	C9orf40	hsa-mir-106b-5p
	#N/A	CEP97	hsa-mir-20b-5p
	#N/A	ZBTB39	hsa-mir-98-5p
	#N/A	STAT3	hsa-mir-21-5p
	#N/A	PKD1	hsa-mir-20a-5p
	#N/A	FAM117B	hsa-mir-20b-5p
	#N/A	MAP3K9	hsa-mir-301a-3p
	#N/A	CNOT4	hsa-mir-93-5p
	#N/A	C11orf24	hsa-mir-92a-3p
	#N/A	PLRG1	hsa-mir-195-5p
	#N/A	CPEB2	hsa-mir-16-5p
	#N/A	TLK1	hsa-mir-16-5p
	#N/A	METTL6	hsa-mir-1275
	#N/A	MBTD1	hsa-mir-27a-3p
	#N/A	TMEM30A	hsa-mir-193a-3p
	#N/A	CSRP2	hsa-mir-27a-3p
	#N/A	SUCO	hsa-mir-20b-5p
	#N/A	CDC25A	hsa-mir-98-5p
	#N/A	TRIM37	hsa-mir-301a-3p
	#N/A	E2F5	hsa-mir-17-5p
	#N/A	POLR3G	hsa-mir-106b-5p
	#N/A	EGR2	hsa-mir-93-5p
	#N/A	KDM5A	hsa-mir-181d-5p
	#N/A	DMXL2	hsa-mir-19a-3p
	#N/A	IGF2R	hsa-mir-16-5p
	#N/A	UBR7	hsa-mir-145-5p
	#N/A	ZNF780B	hsa-mir-181d-5p
	#N/A	ETS1	hsa-mir-377-3p
	#N/A	GOLGA1	hsa-mir-181a-5p
	#N/A	KAT2B	hsa-mir-142-3p
	#N/A	SLK	hsa-mir-20b-5p
	#N/A	STK38	hsa-mir-15a-5p
	#N/A	TPPP	hsa-mir-32-5p
	#N/A	ANKRD13C	hsa-mir-20b-5p
	#N/A	ARHGDIA	hsa-mir-16-5p
	#N/A	CYBRD1	hsa-mir-20b-5p
	#N/A	2018-09-02	hsa-mir-16-5p
	#N/A	TRAK2	hsa-mir-19a-3p
	#N/A	TOR2A	hsa-mir-24-3p
	#N/A	POLR3G	hsa-mir-20a-5p
	#N/A	YOD1	hsa-mir-140-5p
	#N/A	MTMR9	hsa-mir-142-3p
	#N/A	HMGCS1	hsa-mir-18a-5p
	#N/A	RRM2	hsa-mir-342-3p
	#N/A	ZBTB33	hsa-mir-4797-5p
	#N/A	CCL1	hsa-mir-21-5p
	#N/A	MID1IP1	hsa-mir-454-3p
	#N/A	HNRNPA3	hsa-mir-3175
	#N/A	BBX	hsa-mir-20b-5p
	#N/A	JARID2	hsa-mir-130a-3p
	#N/A	FRMD6	hsa-mir-93-5p
	#N/A	KDM4C	hsa-mir-335-5p
	#N/A	NLK	hsa-mir-23a-3p
	#N/A	ZNF652	hsa-mir-26b-5p
	#N/A	CFL2	hsa-mir-19a-3p
	#N/A	MEF2C	hsa-mir-21-5p
	#N/A	TBC1D20	hsa-mir-15a-5p
	#N/A	FOXJ2	hsa-mir-106b-5p
	#N/A	PHKA1	hsa-mir-16-5p
	#N/A	RPS6KB1	hsa-mir-195-5p
	#N/A	ZNRF2	hsa-mir-16-5p
	#N/A	MKX	hsa-mir-195-5p
	#N/A	PLAGL2	hsa-mir-27b-3p
	#N/A	LRRFIP2	hsa-mir-15a-5p
	#N/A	RARA	hsa-mir-218-5p
	#N/A	RLF	hsa-mir-181b-5p
	#N/A	ANP32E	hsa-mir-32-5p
	#N/A	HSPA8	hsa-mir-20b-5p
	#N/A	PTBP2	hsa-mir-223-3p
	#N/A	MTF1	hsa-mir-20b-5p
	#N/A	GPR180	hsa-mir-4328
	#N/A	POPDC2	hsa-mir-4284
	#N/A	HIPK3	hsa-mir-21-5p
	#N/A	NOTCH2	hsa-mir-16-5p
	#N/A	ARHGEF12	hsa-mir-21-5p
	#N/A	TSG101	hsa-mir-20b-5p
	#N/A	ANKRD28	hsa-mir-145-5p
	#N/A	RAB34	hsa-mir-454-3p
	#N/A	KLF13	hsa-mir-125b-5p
	#N/A	DYNC1LI2	hsa-mir-301a-3p
	#N/A	HIF1A	hsa-mir-93-5p
	#N/A	MAPK6	hsa-mir-1297
	#N/A	GDF11	hsa-mir-193a-3p
	PBLD	PBLD	hsa-mir-32-5p
	#N/A	CAPRIN2	hsa-mir-130a-3p
	#N/A	FOXO1	hsa-mir-27b-3p
	#N/A	ZMAT3	hsa-mir-195-5p
	#N/A	TMEM33	hsa-mir-342-3p
	#N/A	RIF1	hsa-mir-223-3p
	#N/A	ZNF410	hsa-mir-26b-5p
	#N/A	TIAM1	hsa-mir-21-5p
	#N/A	MTX3	hsa-mir-181a-5p
	#N/A	RAP2C	hsa-mir-26b-5p
	#N/A	PTPDC1	hsa-mir-106b-5p
	#N/A	MBNL1	hsa-mir-301a-3p
	#N/A	CCDC71L	hsa-mir-17-5p
	#N/A	ATG14	hsa-mir-20b-5p
	#N/A	TBC1D1	hsa-mir-125b-5p
	#N/A	SYNJ1	hsa-mir-92a-3p
	#N/A	BTG2	hsa-mir-32-5p
	#N/A	MYO5B	hsa-mir-16-5p
	#N/A	TGFBR1	hsa-mir-27b-3p
	#N/A	IVNS1ABP	hsa-mir-16-5p
	#N/A	PDIA6	hsa-mir-181b-5p
	#N/A	CERCAM	hsa-mir-106b-5p
	#N/A	TNRC18	hsa-mir-142-3p
	#N/A	CDK19	hsa-mir-301a-3p
	#N/A	MAPK9	hsa-mir-17-5p
	#N/A	PTPDC1	hsa-mir-20b-5p
	#N/A	RBBP7	hsa-mir-17-5p
	#N/A	DICER1	hsa-mir-148a-3p
	#N/A	TMEM242	hsa-mir-17-5p
	#N/A	NCOR2	hsa-mir-10a-5p
	#N/A	JAZF1	hsa-mir-377-3p
	#N/A	NPEPPS	hsa-mir-27b-3p
	#N/A	OLIG2	hsa-mir-218-5p
	#N/A	SBNO1	hsa-mir-4328
	#N/A	CAMSAP2	hsa-mir-374a-5p
	#N/A	SSX2IP	hsa-mir-181a-5p
	#N/A	RTKN	hsa-mir-145-5p
	#N/A	MYO5A	hsa-mir-15a-5p
	#N/A	PHLPP2	hsa-mir-16-5p
	#N/A	ZSWIM6	hsa-mir-374b-5p
	#N/A	TP53INP1	hsa-mir-17-5p
	#N/A	ASNA1	hsa-mir-19a-3p
	#N/A	CCDC47	hsa-mir-196a-5p
	#N/A	HIP1	hsa-mir-106b-5p
	#N/A	MTHFR	hsa-mir-195-5p
	#N/A	ACOX1	hsa-mir-16-5p
	#N/A	ERGIC2	hsa-mir-4795-3p
	#N/A	TNRC6A	hsa-mir-148a-3p
	#N/A	APC	hsa-mir-135b-5p
	#N/A	TEX261	hsa-mir-28-5p
	#N/A	PTBP3	hsa-mir-181b-5p
	#N/A	VAV2	hsa-mir-214-3p
	#N/A	MYO5A	hsa-mir-16-5p
	#N/A	STAT3	hsa-mir-93-5p
	#N/A	KANSL1	hsa-mir-148a-3p
	#N/A	ZBTB9	hsa-mir-93-5p
	#N/A	SECISBP2L	hsa-mir-143-3p
	#N/A	TBC1D24	hsa-mir-455-3p
	#N/A	F3	hsa-mir-93-5p
	#N/A	RRN3	hsa-mir-32-5p
	#N/A	KPNA2	hsa-mir-26b-5p
	#N/A	BRWD1	hsa-mir-454-3p
	#N/A	SMYD1	hsa-mir-665
	#N/A	PPP1R37	hsa-mir-32-5p
	#N/A	VCL	hsa-mir-16-5p
	#N/A	TGFBR3	hsa-mir-195-5p
	#N/A	CD2AP	hsa-mir-32-5p
	#N/A	TADA2B	hsa-mir-20a-5p
	#N/A	KLHL28	hsa-mir-335-5p
	#N/A	SLK	hsa-mir-20a-5p
	#N/A	WASL	hsa-mir-454-3p
	#N/A	RORA	hsa-mir-10b-5p
	#N/A	HSPA5	hsa-mir-199a-5p
	#N/A	MIER1	hsa-mir-4324
	#N/A	SMOC1	hsa-mir-20a-5p
	#N/A	KLHL28	hsa-mir-20a-5p
	#N/A	TMF1	hsa-mir-181d-5p
	#N/A	RPF2	hsa-mir-17-5p
	#N/A	PDIA6	hsa-mir-181d-5p
	#N/A	MID1IP1	hsa-mir-19a-3p
	#N/A	PPP6R3	hsa-mir-106b-5p
	#N/A	GNAS	hsa-mir-218-5p
	#N/A	PPARA	hsa-mir-19a-3p
	#N/A	CRY2	hsa-mir-20a-5p
	#N/A	KATNAL1	hsa-mir-4501
	#N/A	AVL9	hsa-mir-195-5p
	#N/A	ABCA1	hsa-mir-93-5p
	#N/A	NIN	hsa-mir-17-5p
	#N/A	PCGF3	hsa-mir-4291
	#N/A	AGO2	hsa-mir-99a-5p
	#N/A	FBXO28	hsa-mir-19a-3p
	#N/A	SEMA6A	hsa-mir-27a-3p
	#N/A	PRDM4	hsa-mir-16-5p
	#N/A	RSBN1	hsa-mir-92a-3p
	#N/A	ARFGEF1	hsa-mir-19a-3p
	#N/A	GK5	hsa-mir-4279
	#N/A	SESN2	hsa-mir-23c
	#N/A	STAT2	hsa-mir-98-5p
	#N/A	LPGAT1	hsa-mir-93-5p
	#N/A	LRIG3	hsa-mir-98-5p
	#N/A	ARID4B	hsa-mir-20b-5p
	RGMB	RGMB	hsa-mir-20a-5p
	#N/A	PAFAH1B1	hsa-mir-17-5p
	#N/A	TMED5	hsa-mir-27b-3p
	#N/A	LRRC8D	hsa-mir-181b-5p
	#N/A	WAC	hsa-mir-17-5p
	#N/A	INO80D	hsa-mir-181d-5p
	#N/A	CARD10	hsa-mir-15a-5p
	#N/A	SGPP1	hsa-mir-32-5p
	#N/A	REST	hsa-mir-20a-5p
	#N/A	NOTCH2	hsa-mir-195-5p
	#N/A	TET3	hsa-mir-93-5p
	#N/A	SERF1B	hsa-mir-17-5p
	#N/A	RUNDC1	hsa-mir-93-5p
	#N/A	KIAA0513	hsa-mir-106a-5p
	#N/A	CELF1	hsa-mir-21-3p
	#N/A	SPIRE1	hsa-mir-181d-5p
	#N/A	ARIH1	hsa-mir-15a-5p
	#N/A	IKZF4	hsa-mir-125b-5p
	#N/A	SALL1	hsa-mir-195-5p
	#N/A	ZBTB33	hsa-mir-4291
	#N/A	PEG10	hsa-mir-27b-3p
	#N/A	MOB4	hsa-mir-195-5p
	#N/A	KIAA1147	hsa-mir-93-5p
	#N/A	GID4	hsa-mir-32-5p
	#N/A	KIF5A	hsa-mir-16-5p
	#N/A	ARID4B	hsa-mir-106b-5p
	#N/A	F3	hsa-mir-20a-5p
	#N/A	LARP4B	hsa-mir-218-5p
	#N/A	C14orf37	hsa-mir-1297
	#N/A	USP31	hsa-mir-15a-5p
	#N/A	PLXNA1	hsa-mir-93-5p
	#N/A	PCDHB11	hsa-mir-4284
	#N/A	UBN2	hsa-mir-16-5p
	#N/A	PHTF2	hsa-mir-106b-5p
	#N/A	IL1A	hsa-mir-181b-5p
	#N/A	USP42	hsa-mir-195-5p
	#N/A	DDX6	hsa-mir-19a-3p
	#N/A	MAP3K7	hsa-mir-143-3p
	#N/A	NLGN4X	hsa-mir-23b-3p
	#N/A	SIRT4	hsa-mir-16-5p
	#N/A	PLEKHA1	hsa-mir-92a-3p
	#N/A	NRAS	hsa-mir-98-5p
	#N/A	DDA1	hsa-mir-1275
	#N/A	FNDC3A	hsa-mir-98-5p
	#N/A	KIAA0513	hsa-mir-106b-5p
	#N/A	ETNK1	hsa-mir-15a-5p
	#N/A	IGF2BP2	hsa-mir-18a-5p
	#N/A	TRIM71	hsa-mir-98-5p
	#N/A	STARD13	hsa-mir-454-3p
	#N/A	ZNRF1	hsa-mir-214-3p
	#N/A	ARHGEF26	hsa-mir-454-3p
	#N/A	ZFYVE9	hsa-mir-301a-3p
	#N/A	CCNF	hsa-mir-98-5p
	#N/A	AKNA	hsa-mir-665
	#N/A	NAPG	hsa-mir-195-5p
	#N/A	SPIRE1	hsa-mir-181b-5p
	#N/A	RASGRP1	hsa-mir-21-5p
	#N/A	FAM168A	hsa-mir-3175
	#N/A	TGFBR2	hsa-mir-106b-5p
	#N/A	ADD1	hsa-mir-27b-3p
	#N/A	BICD2	hsa-mir-106a-5p
	#N/A	PITPNA	hsa-mir-20a-5p
	#N/A	GATA2	hsa-mir-27a-3p
	#N/A	MFHAS1	hsa-mir-32-5p
	#N/A	BTRC	hsa-mir-195-5p
	#N/A	MFN2	hsa-mir-106b-5p
	#N/A	RREB1	hsa-mir-27b-3p
	#N/A	CHIC1	hsa-mir-16-5p
	#N/A	NAA50	hsa-mir-126-5p
	#N/A	DUSP2	hsa-mir-20b-5p
	#N/A	ARL2	hsa-mir-214-3p
	#N/A	LASP1	hsa-mir-93-5p
	#N/A	KLHL28	hsa-mir-106b-5p
	#N/A	CCNG2	hsa-mir-93-5p
	#N/A	KLF3	hsa-mir-20a-5p
	#N/A	NCOR2	hsa-mir-125b-5p
	#N/A	CYB5A	hsa-mir-223-3p
	#N/A	NFIA	hsa-mir-21-5p
	#N/A	SRPK2	hsa-mir-181a-5p
	#N/A	SIRT1	hsa-mir-181a-5p
	#N/A	UBXN2A	hsa-mir-93-5p
	#N/A	ACVR1	hsa-mir-148a-3p
	#N/A	ELK4	hsa-mir-15a-5p
	#N/A	HPRT1	hsa-mir-19a-3p
	#N/A	KMT2B	hsa-mir-20b-5p
	#N/A	CPEB3	hsa-mir-21-5p
	#N/A	RNF11	hsa-mir-199b-5p
	#N/A	TMEM201	hsa-mir-660-3p
	#N/A	PTPN4	hsa-mir-106a-5p
	#N/A	ERGIC2	hsa-mir-126-5p
	#N/A	PHTF2	hsa-mir-20a-5p
	#N/A	PTPRK	hsa-mir-218-5p
	#N/A	PLAG1	hsa-mir-16-5p
	#N/A	LGR4	hsa-mir-98-5p
	#N/A	KAT2B	hsa-mir-92a-3p
	#N/A	SSX2IP	hsa-mir-93-5p
	#N/A	ZNF711	hsa-mir-454-3p
	#N/A	GXYLT1	hsa-mir-143-3p
	#N/A	TMF1	hsa-mir-92a-3p
	#N/A	SGTB	hsa-mir-17-5p
	#N/A	NLK	hsa-mir-199b-5p
	#N/A	PADI1	hsa-mir-1275
	#N/A	SPTBN2	hsa-mir-16-5p
	#N/A	ITGA2	hsa-mir-16-5p
	#N/A	CCNJ	hsa-mir-125b-5p
	#N/A	SON	hsa-mir-10a-5p
	#N/A	ATG2B	hsa-mir-130a-3p
	#N/A	MAPRE3	hsa-mir-454-3p
	#N/A	ZBTB41	hsa-mir-93-5p
	#N/A	UXS1	hsa-mir-20a-5p
	#N/A	ARRDC3	hsa-mir-181b-5p
	#N/A	VPS13C	hsa-mir-20a-5p
	HOXB7	HOXB7	hsa-mir-196b-5p
	#N/A	SUCO	hsa-mir-93-5p
	#N/A	RAB12	hsa-mir-148a-3p
	#N/A	NRIP3	hsa-mir-20b-5p
	#N/A	TNFAIP1	hsa-mir-20b-5p
	#N/A	WEE1	hsa-mir-16-5p
	#N/A	SMARCA5	hsa-mir-100-5p
	#N/A	STRADB	hsa-mir-24-3p
	#N/A	TWF1	hsa-mir-214-3p
	#N/A	TOB1	hsa-mir-92a-3p
	#N/A	SLC38A2	hsa-mir-181a-5p
	#N/A	ENPP5	hsa-mir-454-3p
	#N/A	UBE2V1	hsa-mir-15a-5p
	#N/A	ZC3H12C	hsa-mir-20b-5p
	#N/A	MBD6	hsa-mir-24-3p
	#N/A	ELAVL2	hsa-mir-17-5p
	#N/A	CCNL1	hsa-mir-19a-3p
	#N/A	AMOTL2	hsa-mir-24-3p
	#N/A	TBPL1	hsa-mir-195-5p
	#N/A	PITPNA	hsa-mir-20b-5p
	#N/A	MAP4	hsa-mir-16-5p
	#N/A	ZDHHC5	hsa-mir-32-5p
	#N/A	SLC25A16	hsa-mir-32-5p
	#N/A	ITGA2	hsa-mir-15a-5p
	#N/A	PHC3	hsa-mir-195-5p
	#N/A	QSER1	hsa-mir-23c
	#N/A	MTMR7	hsa-mir-665
	#N/A	CTDSPL	hsa-mir-18a-5p
	#N/A	GOLGA3	hsa-mir-32-5p
	#N/A	PDLIM5	hsa-mir-16-5p
	#N/A	UBE2D2	hsa-mir-454-3p
	#N/A	CNOT7	hsa-mir-20a-5p
	#N/A	DDN	hsa-mir-24-3p
	#N/A	EZH2	hsa-mir-26b-5p
	#N/A	NKIRAS1	hsa-mir-20b-5p
	#N/A	OTUD7B	hsa-mir-19a-3p
	#N/A	GRB10	hsa-mir-130a-3p
	#N/A	PPP2R5E	hsa-mir-181b-5p
	#N/A	SEMA6D	hsa-mir-23c
	#N/A	TXNIP	hsa-mir-106b-5p
	#N/A	SLC39A9	hsa-mir-15a-5p
	#N/A	LARP1	hsa-mir-374a-5p
	#N/A	PRRC2C	hsa-mir-15a-5p
	#N/A	LDLR	hsa-mir-20b-5p
	#N/A	PAPD7	hsa-mir-32-5p
	#N/A	HMGA2	hsa-mir-98-5p
	#N/A	C8orf58	hsa-mir-23c
	#N/A	CLCN3	hsa-mir-301a-3p
	#N/A	FASLG	hsa-mir-21-5p
	#N/A	SRSF1	hsa-mir-27b-3p
	#N/A	PRR14L	hsa-mir-106b-5p
	#N/A	ENTPD1	hsa-mir-4291
	#N/A	RORA	hsa-mir-18a-5p
	#N/A	DYNC1LI2	hsa-mir-93-5p
	#N/A	PTPN4	hsa-mir-130a-3p
	#N/A	MIDN	hsa-mir-93-5p
	#N/A	MFHAS1	hsa-mir-125b-5p
	#N/A	LCLAT1	hsa-mir-454-3p
	#N/A	ITGB8	hsa-mir-20a-5p
	#N/A	TRIM37	hsa-mir-106b-5p
	#N/A	WNK1	hsa-mir-19a-3p
	#N/A	MAP3K12	hsa-mir-20a-5p
	#N/A	USP28	hsa-mir-106b-5p
	#N/A	RAB9B	hsa-mir-15a-5p
	#N/A	PEX13	hsa-mir-15a-5p
	#N/A	SPRY2	hsa-mir-21-5p
	#N/A	WDR60	hsa-mir-331-3p
	#N/A	RPS6KB1	hsa-mir-145-5p
	#N/A	ZNRF3	hsa-mir-16-5p
	#N/A	HOXA3	hsa-mir-16-5p
	#N/A	MXI1	hsa-mir-26b-5p
	#N/A	ZBTB4	hsa-mir-93-5p
	#N/A	SLC22A23	hsa-mir-106a-5p
	#N/A	ACSL4	hsa-mir-20a-5p
	#N/A	DOCK9	hsa-mir-92a-3p
	#N/A	FAM46C	hsa-mir-17-5p
	#N/A	FAM46A	hsa-mir-21-5p
	#N/A	PRLR	hsa-mir-218-5p
	#N/A	ZFP36L2	hsa-mir-27b-3p
	#N/A	CALM1	hsa-mir-196a-5p
	#N/A	CCNT2	hsa-mir-16-5p
	#N/A	ASH1L	hsa-mir-15a-5p
	#N/A	BMPR2	hsa-mir-20a-5p
	#N/A	AHCYL2	hsa-mir-665
	#N/A	RANBP2	hsa-mir-708-5p
	#N/A	HSPA8	hsa-mir-106a-5p
	#N/A	POLR3G	hsa-mir-26b-5p
	TMEM161B	TMEM161B	hsa-mir-16-5p
	#N/A	RAP1B	hsa-mir-181a-5p
	#N/A	GIGYF1	hsa-mir-18b-5p
	#N/A	B3GNT2	hsa-mir-195-5p
	#N/A	CCNK	hsa-mir-181a-5p
	#N/A	EGLN3	hsa-mir-17-5p
	#N/A	NUP50	hsa-mir-103a-3p
	#N/A	MCL1	hsa-mir-26b-5p
	#N/A	DNAJB4	hsa-mir-103a-3p
	#N/A	DENND5B	hsa-mir-93-5p
	#N/A	GATA6	hsa-mir-181a-5p
	UBL3	UBL3	hsa-mir-19a-3p
	#N/A	FBXO28	hsa-mir-454-3p
	#N/A	FRS2	hsa-mir-93-5p
	#N/A	FSD1L	hsa-mir-181d-5p
	SIDT2	SIDT2	hsa-mir-195-5p
	#N/A	SOD2	hsa-mir-377-3p
	#N/A	SOWAHC	hsa-mir-15a-5p
	#N/A	RCC2	hsa-mir-331-3p
	#N/A	ABTB1	hsa-mir-125b-5p
	#N/A	RB1	hsa-mir-106a-5p
	#N/A	ACBD5	hsa-mir-26b-5p
	#N/A	RUNDC1	hsa-mir-20a-5p
	#N/A	TGFBR2	hsa-mir-301a-3p
	#N/A	CAMSAP2	hsa-mir-130a-3p
	#N/A	KIAA0930	hsa-mir-98-5p
	#N/A	GALNT7	hsa-mir-92a-3p
	#N/A	FGF2	hsa-mir-15a-5p
	#N/A	TMEM127	hsa-mir-20b-5p
	#N/A	TGFBR1	hsa-mir-98-5p
	#N/A	NR2C2	hsa-mir-106a-5p
	#N/A	SUPT16H	hsa-mir-15a-5p
	#N/A	SDHD	hsa-mir-23a-3p
	#N/A	SECISBP2L	hsa-mir-148a-3p
	#N/A	SALL3	hsa-mir-17-5p
	#N/A	FOXQ1	hsa-mir-106b-5p
	#N/A	NR2C2	hsa-mir-20a-5p
	#N/A	PPP3R1	hsa-mir-93-5p
	#N/A	GID4	hsa-mir-92a-3p
	#N/A	CAMSAP1	hsa-mir-19a-3p
	#N/A	CREB1	hsa-mir-181b-5p
	#N/A	CREBZF	hsa-mir-1297
	#N/A	TET3	hsa-mir-26b-5p
	#N/A	SALL3	hsa-mir-106a-5p
	#N/A	WDFY3	hsa-mir-19a-3p
	#N/A	XYLT2	hsa-mir-18a-5p
	#N/A	PPP6C	hsa-mir-106b-5p
	#N/A	OSMR	hsa-mir-4284
	#N/A	C7orf43	hsa-mir-20b-5p
	#N/A	NR2C2	hsa-mir-15a-5p
	#N/A	SCAMP2	hsa-mir-106b-5p
	#N/A	ZFYVE26	hsa-mir-93-5p
	#N/A	PGPEP1	hsa-mir-665
	#N/A	ARHGAP35	hsa-mir-93-5p
	#N/A	IGLON5	hsa-mir-4279
	#N/A	RNF145	hsa-mir-17-5p
	#N/A	EIF5A2	hsa-mir-20a-5p
	#N/A	CAPN15	hsa-mir-106b-5p
	#N/A	PCDHA3	hsa-mir-181a-5p
	COL4A1	COL4A1	hsa-mir-218-5p
	#N/A	MSMO1	hsa-mir-130a-3p
	#N/A	PTPRJ	hsa-mir-195-5p
	#N/A	FJX1	hsa-mir-20a-5p
	#N/A	SLC19A2	hsa-mir-26b-5p
	#N/A	POLR3H	hsa-mir-331-3p
	#N/A	KIAA1147	hsa-mir-106b-5p
	#N/A	MPP5	hsa-mir-181a-5p
	#N/A	PPP1CC	hsa-mir-218-5p
	#N/A	ARL2	hsa-mir-16-5p
	#N/A	AXIN2	hsa-mir-15a-5p
	#N/A	PDIA6	hsa-mir-15a-5p
	#N/A	MCL1	hsa-mir-106b-5p
	COL5A2	COL5A2	hsa-mir-143-3p
	#N/A	CDK19	hsa-mir-130a-3p
	PDK4	PDK4	hsa-mir-103a-3p
	#N/A	NKIRAS1	hsa-mir-93-5p
	#N/A	PEX13	hsa-mir-16-5p
	#N/A	EDEM1	hsa-mir-32-5p
	#N/A	LMAN2L	hsa-mir-16-5p
	#N/A	MAP3K9	hsa-mir-148a-3p
	#N/A	PARD6B	hsa-mir-18b-5p
	#N/A	KIF5B	hsa-mir-92a-3p
	#N/A	LAPTM4A	hsa-mir-93-5p
	#N/A	C16orf72	hsa-mir-16-5p
	ASPN	ASPN	hsa-mir-26b-5p
	#N/A	CACUL1	hsa-mir-15a-5p
	#N/A	PKNOX1	hsa-mir-106a-5p
	#N/A	CCSER2	hsa-mir-17-5p
	#N/A	HSPA4L	hsa-mir-195-5p
	#N/A	CDC27	hsa-mir-223-3p
	#N/A	TMEM127	hsa-mir-17-5p
	#N/A	TMED5	hsa-mir-4328
	#N/A	ATG14	hsa-mir-106b-5p
	#N/A	ARNTL	hsa-mir-142-3p
	#N/A	TIMP3	hsa-mir-181b-5p
	#N/A	FAM126B	hsa-mir-93-5p
	#N/A	MFSD8	hsa-mir-93-5p
	#N/A	IKZF3	hsa-mir-4797-5p
	#N/A	GNB5	hsa-mir-106b-5p
	#N/A	CPEB3	hsa-mir-195-5p
	#N/A	MFSD8	hsa-mir-98-5p
	#N/A	CCND1	hsa-mir-20b-5p
	#N/A	ZFYVE26	hsa-mir-106b-5p
	#N/A	ALG9	hsa-mir-27b-3p
	#N/A	DDX58	hsa-mir-218-5p
	#N/A	NABP1	hsa-mir-93-5p
	#N/A	CCNE1	hsa-mir-15a-5p
	#N/A	PLAG1	hsa-mir-126-5p
	#N/A	SYNJ1	hsa-mir-16-5p
	#N/A	MFN2	hsa-mir-16-5p
	#N/A	HSP90B1	hsa-mir-181a-5p
	#N/A	SPAG9	hsa-mir-218-5p
	#N/A	CBX4	hsa-mir-181b-5p
	#N/A	RNF145	hsa-mir-93-5p
	#N/A	PRPF39	hsa-mir-21-5p
	#N/A	DICER1	hsa-mir-103a-3p
	#N/A	MESDC1	hsa-mir-27a-3p
	#N/A	DNAJA1	hsa-mir-335-5p
	#N/A	SLC25A32	hsa-mir-92a-3p
	#N/A	PPP6R3	hsa-mir-93-5p
	#N/A	MTF1	hsa-mir-103a-3p
	#N/A	PRDM4	hsa-mir-195-5p
	#N/A	GGA3	hsa-mir-214-5p
	#N/A	FAR1	hsa-mir-92a-3p
	#N/A	FZD4	hsa-mir-199a-5p
	#N/A	MON2	hsa-mir-21-5p
	#N/A	SREK1	hsa-mir-15a-5p
	#N/A	TANC1	hsa-mir-20a-5p
	#N/A	SPTLC1	hsa-mir-15a-5p
	#N/A	BAG4	hsa-mir-195-5p
	#N/A	RORA	hsa-mir-10a-5p
	#N/A	ZBTB18	hsa-mir-130a-3p
	#N/A	SIK1	hsa-mir-17-5p
	#N/A	PLS1	hsa-mir-106b-5p
	#N/A	CAB39	hsa-mir-19a-3p
	#N/A	U2SURP	hsa-mir-20b-5p
	#N/A	NUP50	hsa-mir-15a-5p
	#N/A	FAM3C	hsa-mir-181b-5p
	#N/A	E2F2	hsa-mir-98-5p
	#N/A	RAVER2	hsa-mir-99b-5p
	#N/A	UBR3	hsa-mir-15a-5p
	#N/A	C2orf42	hsa-mir-15a-5p
	#N/A	MAPK6	hsa-mir-26b-5p
	#N/A	GPM6A	hsa-mir-218-5p
	#N/A	ZBTB18	hsa-mir-19a-3p
	#N/A	KLHL28	hsa-mir-106a-5p
	#N/A	OTUD3	hsa-mir-32-5p
	#N/A	RAB10	hsa-mir-106a-5p
	#N/A	ELK4	hsa-mir-17-5p
	#N/A	RBBP7	hsa-mir-20a-5p
	#N/A	PARD6B	hsa-mir-93-5p
	#N/A	RLIM	hsa-mir-130a-3p
	#N/A	FBXO8	hsa-mir-19a-3p
	#N/A	APC	hsa-mir-142-3p
	#N/A	RAB10	hsa-mir-20b-5p
	#N/A	PXK	hsa-mir-454-3p
	#N/A	TNRC6B	hsa-mir-16-5p
	#N/A	DDX3X	hsa-mir-342-3p
	#N/A	SEMA6A	hsa-mir-27b-3p
	#N/A	FAM210A	hsa-mir-20a-5p
	#N/A	PPIF	hsa-mir-4795-3p
	#N/A	CSDE1	hsa-mir-15a-5p
	#N/A	OXR1	hsa-mir-17-5p
	#N/A	SSX2IP	hsa-mir-26b-5p
	#N/A	TET3	hsa-mir-17-5p
	#N/A	TET3	hsa-mir-98-5p
	#N/A	CEP97	hsa-mir-106b-5p
	#N/A	IER3IP1	hsa-mir-130a-3p
	#N/A	ARSJ	hsa-mir-181a-5p
	#N/A	MCL1	hsa-mir-125b-5p
	#N/A	HTT	hsa-mir-16-5p
	#N/A	ZNF699	hsa-mir-181b-5p
	#N/A	CARM1	hsa-mir-15a-5p
	#N/A	SPRED1	hsa-mir-16-5p
	#N/A	RNMT	hsa-mir-16-5p
	#N/A	CASP2	hsa-mir-708-5p
	#N/A	UXS1	hsa-mir-17-5p
	#N/A	YIPF4	hsa-mir-32-5p
	#N/A	NKIRAS1	hsa-mir-106a-5p
	#N/A	ABHD17C	hsa-mir-145-5p
	#N/A	AFTPH	hsa-mir-19a-3p
	#N/A	GPAM	hsa-mir-27b-3p
	#N/A	HIPK3	hsa-mir-374c-5p
	#N/A	KIAA1462	hsa-mir-181a-5p
	#N/A	U2SURP	hsa-mir-93-5p
	#N/A	ZBTB7A	hsa-mir-17-5p
	#N/A	YARS	hsa-mir-4324
	#N/A	STAT2	hsa-mir-665
	#N/A	SHOC2	hsa-mir-4291
	#N/A	TP53INP1	hsa-mir-20a-5p
	#N/A	PPP1R3B	hsa-mir-4328
	#N/A	ATG16L1	hsa-mir-17-5p
	#N/A	RRAGD	hsa-mir-19a-3p
	#N/A	SIK1	hsa-mir-454-3p
	#N/A	ZNF275	hsa-mir-16-5p
	#N/A	USP15	hsa-mir-195-5p
	#N/A	TRAM1	hsa-mir-195-5p
	#N/A	SESN3	hsa-mir-20b-5p
	#N/A	TXLNA	hsa-mir-20b-5p
	#N/A	CPEB2	hsa-mir-15a-5p
	#N/A	NUFIP2	hsa-mir-214-3p
	#N/A	PPIF	hsa-mir-27a-3p
	#N/A	ORMDL3	hsa-mir-93-5p
	#N/A	KIF23	hsa-mir-17-5p
	#N/A	CFL2	hsa-mir-20b-5p
	#N/A	ING4	hsa-mir-214-3p
	#N/A	CDADC1	hsa-mir-130a-3p
	#N/A	SEMA5A	hsa-mir-218-5p
	#N/A	MAP3K2	hsa-mir-20a-5p
	#N/A	YWHAQ	hsa-mir-16-5p
	#N/A	TWF1	hsa-mir-93-5p
	#N/A	RBL1	hsa-mir-20a-5p
	#N/A	ACSL4	hsa-mir-130a-3p
	#N/A	SNX10	hsa-mir-32-5p
	#N/A	PPP6R1	hsa-mir-130a-3p
	#N/A	CDK9	hsa-mir-4290
	#N/A	TACC1	hsa-mir-374b-5p
	#N/A	NSF	hsa-mir-92a-3p
	#N/A	HIF1A	hsa-mir-199a-5p
	#N/A	RNF41	hsa-mir-195-5p
	#N/A	RRM2	hsa-mir-98-5p
	#N/A	ZER1	hsa-mir-374b-5p
	#N/A	ZNF217	hsa-mir-19a-3p
	#N/A	SASH1	hsa-mir-21-5p
	#N/A	DUSP10	hsa-mir-32-5p
	#N/A	FAM104A	hsa-mir-98-5p
	#N/A	HECW2	hsa-mir-181a-5p
	#N/A	TXNIP	hsa-mir-93-5p
	#N/A	LDLR	hsa-mir-19a-3p
	#N/A	CNN3	hsa-mir-27b-3p
	#N/A	CYP26B1	hsa-mir-195-5p
	#N/A	CFL2	hsa-mir-106b-5p
	#N/A	DNM1L	hsa-mir-17-5p
	#N/A	SLX4	hsa-mir-92a-3p
	#N/A	ZBTB5	hsa-mir-98-5p
	#N/A	MORC3	hsa-mir-32-5p
	#N/A	ARID2	hsa-mir-374a-5p
	#N/A	MYH1	hsa-mir-23a-3p
	#N/A	ACOX1	hsa-mir-195-5p
	#N/A	STK38	hsa-mir-195-5p
	#N/A	TRIM29	hsa-mir-214-3p
	#N/A	VEGFA	hsa-mir-16-5p
	#N/A	PRR14L	hsa-mir-93-5p
	#N/A	POLR3G	hsa-mir-93-5p
	#N/A	HELZ	hsa-mir-16-5p
	#N/A	IRS2	hsa-mir-98-5p
	#N/A	EZH1	hsa-mir-93-5p
	#N/A	NAA30	hsa-mir-21-5p
	#N/A	FRMD3	hsa-mir-342-3p
	#N/A	ABRACL	hsa-mir-145-3p
	#N/A	FASN	hsa-mir-195-5p
	#N/A	SMAD3	hsa-mir-145-5p
	#N/A	NFAT5	hsa-mir-93-5p
	#N/A	RASEF	hsa-mir-195-5p
	#N/A	LURAP1L	hsa-mir-16-5p
	#N/A	ZFYVE9	hsa-mir-20a-5p
	#N/A	KMT2D	hsa-mir-98-5p
	#N/A	GFI1	hsa-mir-142-3p
	#N/A	RAB10	hsa-mir-20a-5p
	#N/A	EPS15L1	hsa-mir-17-5p
	#N/A	ENTPD1	hsa-mir-195-5p
	#N/A	AP1AR	hsa-mir-21-5p
	#N/A	PHOX2B	hsa-mir-181b-5p
	#N/A	POLR3G	hsa-mir-17-5p
	#N/A	TMED7	hsa-mir-23a-3p
	#N/A	EPHA4	hsa-mir-106b-5p
	#N/A	SKI	hsa-mir-15a-5p
	#N/A	TP53INP1	hsa-mir-19a-3p
	#N/A	SCD	hsa-mir-181d-5p
	#N/A	GBF1	hsa-mir-106b-5p
	#N/A	STK11IP	hsa-mir-660-3p
	#N/A	ETNK1	hsa-mir-23c
	#N/A	BICD2	hsa-mir-93-5p
	#N/A	RBBP6	hsa-mir-195-5p
	#N/A	IPPK	hsa-mir-15a-5p
	#N/A	C2orf42	hsa-mir-19a-3p
	#N/A	TGFBR1	hsa-mir-181a-5p
	#N/A	KCNS3	hsa-mir-125b-5p
	#N/A	ANKRD50	hsa-mir-20a-5p
	#N/A	HBP1	hsa-mir-301a-3p
	#N/A	RORA	hsa-mir-93-5p
	#N/A	PHF6	hsa-mir-20a-5p
	#N/A	CDKN1A	hsa-mir-93-5p
	#N/A	ELL2	hsa-mir-27a-3p
	#N/A	CAPRIN2	hsa-mir-181b-5p
	#N/A	ELK4	hsa-mir-16-5p
	#N/A	LAPTM4A	hsa-mir-106a-5p
	#N/A	TMF1	hsa-mir-181a-5p
	#N/A	CEP57	hsa-mir-20b-5p
	#N/A	PDP2	hsa-mir-98-5p
	#N/A	MBNL3	hsa-mir-130a-3p
	#N/A	LIMD2	hsa-mir-3175
	#N/A	SLAIN2	hsa-mir-20b-5p
	#N/A	UBR3	hsa-mir-1297
	#N/A	RCOR1	hsa-mir-26b-5p
	#N/A	GOLT1B	hsa-mir-16-5p
	#N/A	RET	hsa-mir-218-5p
	#N/A	CALU	hsa-mir-15a-5p
	#N/A	FOXO1	hsa-mir-27a-3p
	#N/A	FBXO11	hsa-mir-181a-5p
	#N/A	FRS2	hsa-mir-106a-5p
	#N/A	ZNF532	hsa-mir-17-5p
	#N/A	GJA1	hsa-mir-130a-3p
	#N/A	LHFPL4	hsa-mir-10a-5p
	#N/A	USP28	hsa-mir-20a-5p
	#N/A	NAPEPLD	hsa-mir-17-5p
	#N/A	EDEM1	hsa-mir-92a-3p
	#N/A	LRIG3	hsa-mir-196a-5p
	#N/A	PTPN4	hsa-mir-20b-5p
	#N/A	CIC	hsa-mir-32-5p
	#N/A	EPHA7	hsa-mir-196a-5p
	#N/A	TNKS1BP1	hsa-mir-93-5p
	#N/A	ENPP5	hsa-mir-93-5p
	#N/A	PDXK	hsa-mir-24-3p
	#N/A	ANKRD50	hsa-mir-17-5p
	#N/A	CNOT6L	hsa-mir-106a-5p
	#N/A	HIC2	hsa-mir-24-3p
	#N/A	MAP3K12	hsa-mir-17-5p
	#N/A	BTG3	hsa-mir-93-5p
	#N/A	SLC25A25	hsa-mir-181a-5p
	#N/A	VEZF1	hsa-mir-140-5p
	#N/A	CYBRD1	hsa-mir-106b-5p
	#N/A	CHORDC1	hsa-mir-16-5p
	#N/A	ANKIB1	hsa-mir-93-5p
	RGMB	RGMB	hsa-mir-106b-5p
	#N/A	SNRPB2	hsa-mir-195-5p
	#N/A	KIAA1468	hsa-mir-374a-5p
	#N/A	DDX5	hsa-mir-93-5p
	#N/A	FAM222B	hsa-mir-181a-5p
	#N/A	GTF3C4	hsa-mir-331-3p
	#N/A	MTMR3	hsa-mir-20b-5p
	#N/A	FAM46C	hsa-mir-106b-5p
	#N/A	PHF12	hsa-mir-130a-3p
	#N/A	SOWAHC	hsa-mir-93-5p
	#N/A	FOXQ1	hsa-mir-20a-5p
	#N/A	TNFAIP1	hsa-mir-17-5p
	#N/A	MINK1	hsa-mir-106a-5p
	#N/A	MB21D2	hsa-mir-130a-3p
	#N/A	SNN	hsa-mir-32-5p
	#N/A	KRIT1	hsa-mir-21-5p
	#N/A	LMLN	hsa-mir-130a-3p
	#N/A	TSEN34	hsa-mir-142-3p
	#N/A	CARD10	hsa-mir-195-5p
	#N/A	KPNA1	hsa-mir-181b-5p
	#N/A	FAM126B	hsa-mir-106a-5p
	#N/A	PTP4A2	hsa-mir-145-5p
	#N/A	SLAIN2	hsa-mir-93-5p
	#N/A	NLGN4X	hsa-mir-23c
	#N/A	SIK1	hsa-mir-130a-3p
	#N/A	TNFRSF21	hsa-mir-106a-5p
	#N/A	BACH1	hsa-mir-4324
	#N/A	ST14	hsa-mir-27b-3p
	#N/A	BCL11B	hsa-mir-16-5p
	#N/A	ETS1	hsa-mir-4328
	#N/A	CD40LG	hsa-mir-1275
	#N/A	ADD3	hsa-mir-145-5p
	#N/A	C11orf24	hsa-mir-16-5p
	#N/A	KCNJ2	hsa-mir-19a-3p
	#N/A	ANKRD13B	hsa-mir-1275
	#N/A	VPS37A	hsa-mir-454-3p
	#N/A	CRKL	hsa-mir-15a-5p
	#N/A	SLC7A1	hsa-mir-125b-5p
	#N/A	MEF2C	hsa-mir-223-3p
	#N/A	BTAF1	hsa-mir-16-5p
	#N/A	KIAA0513	hsa-mir-20b-5p
	#N/A	RRM2	hsa-mir-20a-5p
	#N/A	MAPK1	hsa-mir-17-5p
	#N/A	PPP2R5E	hsa-mir-181d-5p
	#N/A	PTPN3	hsa-mir-16-5p
	#N/A	DLGAP3	hsa-mir-1275
	#N/A	SRGN	hsa-mir-4317
	#N/A	RAP2C	hsa-mir-195-5p
	#N/A	ATP6V1B2	hsa-mir-19a-3p
	#N/A	LONRF1	hsa-mir-335-5p
	#N/A	ERC1	hsa-mir-214-3p
	#N/A	NUFIP2	hsa-mir-135b-5p
	#N/A	SPOPL	hsa-mir-17-5p
	#N/A	KRAS	hsa-mir-143-3p
	#N/A	RORA	hsa-mir-18b-5p
	#N/A	KIF3B	hsa-mir-181b-5p
	#N/A	UNKL	hsa-mir-93-5p
	#N/A	RNF138	hsa-mir-195-5p
	#N/A	ATL3	hsa-mir-17-5p
	#N/A	PRKAA1	hsa-mir-454-3p
	#N/A	SESN3	hsa-mir-20a-5p
	#N/A	TGFBI	hsa-mir-21-5p
	#N/A	TNFAIP3	hsa-mir-23c
	#N/A	ZNF202	hsa-mir-20a-5p
	#N/A	PIK3AP1	hsa-mir-92a-3p
	#N/A	ZFYVE9	hsa-mir-106b-5p
	#N/A	CPSF7	hsa-mir-195-5p
	MAGI1	MAGI1	hsa-mir-24-3p
	#N/A	CHCHD10	hsa-mir-92a-3p
	#N/A	YWHAH	hsa-mir-103a-3p
	#N/A	NEURL1B	hsa-mir-342-3p
	#N/A	GIGYF1	hsa-mir-106a-5p
	#N/A	OSBPL8	hsa-mir-181b-5p
	CA2	CA2	hsa-mir-23b-3p
	#N/A	LRIG3	hsa-mir-196b-5p
	#N/A	KLF3	hsa-mir-93-5p
	#N/A	BCAT1	hsa-mir-4328
	#N/A	MLLT6	hsa-mir-16-5p
	#N/A	SERINC3	hsa-mir-19a-3p
	#N/A	ETS1	hsa-mir-125b-5p
	#N/A	RHOC	hsa-mir-106b-5p
	#N/A	UBE2D1	hsa-mir-27b-3p
	#N/A	ECT2	hsa-mir-223-3p
	LYPD6B	LYPD6B	hsa-mir-218-5p
	#N/A	MBNL2	hsa-mir-374a-5p
	#N/A	OXR1	hsa-mir-20a-5p
	#N/A	EDN1	hsa-mir-130a-3p
	#N/A	MEF2A	hsa-mir-19a-3p
	#N/A	ANKRD33B	hsa-mir-106a-5p
	#N/A	MTF1	hsa-mir-20a-5p
	#N/A	PISD	hsa-mir-16-5p
	#N/A	ARL4C	hsa-mir-26b-5p
	#N/A	ZNF532	hsa-mir-20a-5p
	#N/A	CAPN15	hsa-mir-93-5p
	#N/A	UBE2V1	hsa-mir-4291
	#N/A	WEE1	hsa-mir-195-5p
	#N/A	PTP4A1	hsa-mir-374c-5p
	#N/A	UST	hsa-mir-374b-5p
	#N/A	STMN4	hsa-mir-4279
	#N/A	PRRC2C	hsa-mir-181a-5p
	#N/A	BTG2	hsa-mir-125b-5p
	#N/A	TBC1D2	hsa-mir-17-5p
	#N/A	KPNA1	hsa-mir-15a-5p
	#N/A	LCOR	hsa-mir-27b-3p
	#N/A	TGFBR2	hsa-mir-454-3p
	#N/A	HIF1A	hsa-mir-20a-5p
	#N/A	PPP1R11	hsa-mir-195-5p
	#N/A	FNIP1	hsa-mir-23b-3p
	#N/A	SMAD5	hsa-mir-93-5p
	#N/A	ULK1	hsa-mir-106b-5p
	#N/A	GATA6	hsa-mir-196a-5p
	#N/A	SHISA6	hsa-mir-3175
	#N/A	SPRED1	hsa-mir-106a-5p
	#N/A	PDHX	hsa-mir-27a-3p
	#N/A	RPS6KA3	hsa-mir-181a-5p
	#N/A	CPA4	hsa-mir-98-5p
	#N/A	LOXL2	hsa-mir-26b-5p
	#N/A	YOD1	hsa-mir-106b-5p
	#N/A	HMGA1	hsa-mir-196b-5p
	#N/A	ZNF449	hsa-mir-103a-3p
	#N/A	FGFR3	hsa-mir-99a-5p
	#N/A	SBNO1	hsa-mir-16-5p
	#N/A	FBXL20	hsa-mir-16-5p
	#N/A	ARHGAP12	hsa-mir-20a-5p
	#N/A	NIN	hsa-mir-16-5p
	#N/A	ANKRD33B	hsa-mir-17-5p
	#N/A	MCC	hsa-mir-106b-5p
	#N/A	GTF2A1	hsa-mir-26b-5p
	#N/A	MCC	hsa-mir-130a-3p
	#N/A	TNRC6B	hsa-mir-19a-3p
	#N/A	ABL2	hsa-mir-16-5p
	#N/A	C5orf24	hsa-mir-3175
	#N/A	FOXK1	hsa-mir-15a-5p
	#N/A	CCND1	hsa-mir-106a-5p
	#N/A	ITM2C	hsa-mir-218-5p
	#N/A	MTDH	hsa-mir-26b-5p
	#N/A	HMGA1	hsa-mir-196a-5p
	#N/A	IL5	hsa-mir-4279
	#N/A	PCDH10	hsa-mir-19a-3p
	#N/A	FAM129A	hsa-mir-20a-5p
	#N/A	HBP1	hsa-mir-106a-5p
	#N/A	SOCS6	hsa-mir-17-5p
	#N/A	ZCCHC3	hsa-mir-98-5p
	#N/A	NETO2	hsa-mir-20b-5p
	#N/A	MCM8	hsa-mir-943
	#N/A	ATG16L1	hsa-mir-20b-5p
	#N/A	PLAGL2	hsa-mir-27a-3p
	#N/A	ARPP19	hsa-mir-4324
	#N/A	NR2C2	hsa-mir-17-5p
	#N/A	B3GALNT2	hsa-mir-1275
	#N/A	GRB10	hsa-mir-301a-3p
	#N/A	SEMA6D	hsa-mir-23b-3p
	#N/A	HBP1	hsa-mir-19a-3p
	#N/A	PTP4A1	hsa-mir-26b-5p
	#N/A	DMTF1	hsa-mir-16-5p
	#N/A	ZNF148	hsa-mir-27a-3p
	#N/A	PPP6R3	hsa-mir-106a-5p
	#N/A	SACS	hsa-mir-26b-5p
	#N/A	GMFB	hsa-mir-19a-3p
	#N/A	WAC	hsa-mir-20b-5p
	#N/A	MSH2	hsa-mir-21-5p
	#N/A	KIAA1147	hsa-mir-17-5p
	#N/A	ANKIB1	hsa-mir-92a-3p
	#N/A	PCDHA10	hsa-mir-181a-5p
	#N/A	HMGB3	hsa-mir-20b-5p
	#N/A	TPPP3	hsa-mir-16-5p
	#N/A	TNKS2	hsa-mir-20b-5p
	#N/A	IVNS1ABP	hsa-mir-145-5p
	#N/A	TNPO2	hsa-mir-19a-3p
	#N/A	RPS6KA5	hsa-mir-106b-5p
	#N/A	SMCR8	hsa-mir-98-5p
	#N/A	MTMR4	hsa-mir-16-5p
	#N/A	DYRK2	hsa-mir-24-3p
	#N/A	YOD1	hsa-mir-196a-5p
	#N/A	MASTL	hsa-mir-20a-5p
	#N/A	OSBPL10	hsa-mir-143-5p
	#N/A	PGP	hsa-mir-93-5p
	#N/A	RPL37	hsa-mir-4317
	#N/A	ZBTB10	hsa-mir-195-5p
	#N/A	UGGT1	hsa-mir-1297
	#N/A	FAM210A	hsa-mir-106b-5p
	#N/A	RAB10	hsa-mir-140-5p
	#N/A	SKI	hsa-mir-195-5p
	#N/A	LPGAT1	hsa-mir-20a-5p
	#N/A	CNOT4	hsa-mir-106b-5p
	#N/A	ELMSAN1	hsa-mir-181d-5p
	#N/A	C8orf4	hsa-mir-27a-3p
	#N/A	PRRC2C	hsa-mir-195-5p
	#N/A	RPRD2	hsa-mir-23c
	#N/A	SSH2	hsa-mir-17-5p
	#N/A	PRKG1	hsa-mir-218-5p
	#N/A	CHIC1	hsa-mir-17-5p
	#N/A	C9orf72	hsa-mir-142-3p
	#N/A	PPP1R15B	hsa-mir-106a-5p
	#N/A	PHIP	hsa-mir-218-5p
	#N/A	PODXL	hsa-mir-199b-5p
	#N/A	TGFBR3	hsa-mir-103a-3p
	#N/A	CS	hsa-mir-214-3p
	#N/A	SNX16	hsa-mir-15a-5p
	#N/A	USP9X	hsa-mir-708-5p
	#N/A	STX6	hsa-mir-301a-3p
	#N/A	CFL2	hsa-mir-106a-5p
	#N/A	DYRK2	hsa-mir-193a-3p
	#N/A	FLCN	hsa-mir-195-5p
	#N/A	G3BP1	hsa-mir-4328
	#N/A	GNS	hsa-mir-106b-5p
	#N/A	ARHGAP1	hsa-mir-93-5p
	#N/A	EDEM3	hsa-mir-98-5p
	#N/A	BLOC1S2	hsa-mir-1297
	#N/A	BLCAP	hsa-mir-130a-3p
	#N/A	WNK1	hsa-mir-26b-5p
	#N/A	LAPTM4A	hsa-mir-106b-5p
	#N/A	RUFY2	hsa-mir-20a-5p
	#N/A	PAFAH1B2	hsa-mir-103a-3p
	#N/A	KPNA2	hsa-mir-106b-5p
	#N/A	ANKRD49	hsa-mir-342-3p
	#N/A	HAUS8	hsa-mir-20b-5p
	#N/A	TXLNA	hsa-mir-20a-5p
	#N/A	CREB1	hsa-mir-106a-5p
	#N/A	KATNAL1	hsa-mir-15a-5p
	#N/A	TNFAIP3	hsa-mir-19a-3p
	#N/A	ARHGAP1	hsa-mir-20a-5p
	#N/A	FNDC3B	hsa-mir-143-3p
	#N/A	CEP55	hsa-mir-16-5p
	#N/A	TNFAIP1	hsa-mir-106b-5p
	#N/A	TADA2B	hsa-mir-93-5p
	#N/A	ITPR1	hsa-mir-32-5p
	#N/A	ZNF275	hsa-mir-195-5p
	#N/A	MAFB	hsa-mir-148a-3p
	#N/A	UBE2K	hsa-mir-26b-5p
	#N/A	GMFB	hsa-mir-454-3p
	#N/A	ARHGAP12	hsa-mir-19a-3p
	#N/A	RUNX2	hsa-mir-218-5p
	#N/A	ADRA2B	hsa-mir-3175
	#N/A	MBNL3	hsa-mir-454-3p
	#N/A	TNPO1	hsa-mir-181a-5p
	#N/A	FNDC3B	hsa-mir-16-5p
	#N/A	SLC12A7	hsa-mir-130a-3p
	#N/A	DPYSL2	hsa-mir-454-3p
	#N/A	ANKRD13C	hsa-mir-20a-5p
	#N/A	BRWD3	hsa-mir-19a-3p
	#N/A	PTK2B	hsa-mir-23b-3p
	#N/A	MAP3K3	hsa-mir-181b-5p
	#N/A	NCOA3	hsa-mir-4324
	#N/A	KRBOX4	hsa-mir-181b-5p
	#N/A	LPCAT1	hsa-mir-181a-5p
	GPR155	GPR155	hsa-mir-660-3p
	#N/A	ORMDL3	hsa-mir-1275
	#N/A	EML1	hsa-mir-27b-3p
	#N/A	ATG9A	hsa-mir-15a-5p
	#N/A	CEP55	hsa-mir-130a-3p
	#N/A	CTDSPL	hsa-mir-100-5p
	#N/A	ERRFI1	hsa-mir-148a-3p
	#N/A	KDSR	hsa-mir-4279
	#N/A	SFRP2	hsa-mir-218-5p
	#N/A	PBX3	hsa-mir-93-5p
	#N/A	TFAP2C	hsa-mir-10a-5p
	#N/A	HIF1A	hsa-mir-106b-5p
	#N/A	ULK1	hsa-mir-20b-5p
	#N/A	LIN28B	hsa-mir-125b-5p
	#N/A	ACVR1	hsa-mir-301a-3p
	#N/A	SSRP1	hsa-mir-16-5p
	#N/A	RABEP1	hsa-mir-20a-5p
	#N/A	RLIM	hsa-mir-454-3p
	#N/A	BCL7B	hsa-mir-26b-5p
	#N/A	RAB39A	hsa-mir-142-3p
	#N/A	BCR	hsa-mir-10a-5p
	#N/A	PPP1R15B	hsa-mir-20b-5p
	#N/A	ATXN10	hsa-mir-21-5p
	#N/A	PCDHA1	hsa-mir-181a-5p
	#N/A	YWHAQ	hsa-mir-195-5p
	#N/A	SSH2	hsa-mir-93-5p
	#N/A	PTPRD	hsa-mir-15a-5p
	#N/A	ATAD2	hsa-mir-374c-5p
	#N/A	ANKRD12	hsa-mir-17-5p
	#N/A	FZD6	hsa-mir-19a-3p
	#N/A	ARSK	hsa-mir-10b-5p
	#N/A	EZH1	hsa-mir-15a-5p
	#N/A	OSBPL2	hsa-mir-4284
	#N/A	FJX1	hsa-mir-93-5p
	#N/A	TMEM245	hsa-mir-17-5p
	#N/A	ZHX1	hsa-mir-199a-3p
	#N/A	DYNLL2	hsa-mir-27a-3p
	#N/A	ABCA1	hsa-mir-20b-5p
	#N/A	ESR1	hsa-mir-301a-3p
	#N/A	FOXO1	hsa-mir-223-3p
	#N/A	ANKIB1	hsa-mir-32-5p
	#N/A	BTRC	hsa-mir-15a-5p
	#N/A	MTMR3	hsa-mir-17-5p
	#N/A	TMF1	hsa-mir-32-5p
	#N/A	PHF12	hsa-mir-301a-3p
	#N/A	PXK	hsa-mir-17-5p
	#N/A	HOXC8	hsa-mir-196b-5p
	#N/A	ESRP2	hsa-mir-4328
	#N/A	RACGAP1	hsa-mir-301a-3p
	#N/A	RICTOR	hsa-mir-142-3p
	#N/A	SERPINE1	hsa-mir-145-5p
	#N/A	FAM117B	hsa-mir-17-5p
	#N/A	ETNK1	hsa-mir-195-5p
	#N/A	CTNNBIP1	hsa-mir-145-5p
	#N/A	TAOK1	hsa-mir-27b-3p
	#N/A	KPNB1	hsa-mir-181b-5p
	#N/A	TGFBR3	hsa-mir-27b-3p
	#N/A	RALGPS1	hsa-mir-377-3p
	#N/A	YTHDC1	hsa-mir-15a-5p
	#N/A	TBP	hsa-mir-16-5p
	#N/A	PON2	hsa-mir-106b-5p
	#N/A	PTPN23	hsa-mir-142-3p
	#N/A	SMOC1	hsa-mir-301a-3p
	#N/A	PEAK1	hsa-mir-32-5p
	#N/A	TOB1	hsa-mir-1297
	#N/A	BOLA3	hsa-mir-374a-5p
	#N/A	LONRF1	hsa-mir-4328
	#N/A	MET	hsa-mir-130a-3p
	#N/A	TRPM6	hsa-mir-24-3p
	#N/A	PPP3R1	hsa-mir-106b-5p
	#N/A	MAN2A1	hsa-mir-92a-3p
	#N/A	RPA2	hsa-mir-20b-5p
	#N/A	SACS	hsa-mir-106b-5p
	#N/A	PLS1	hsa-mir-106a-5p
	#N/A	BLOC1S3	hsa-mir-665
	#N/A	XRN1	hsa-mir-10a-5p
	#N/A	CBX7	hsa-mir-181b-5p
	#N/A	PAPD4	hsa-mir-374b-5p
	#N/A	AFF4	hsa-mir-374b-5p
	#N/A	WASL	hsa-mir-142-3p
	#N/A	TRIM37	hsa-mir-20a-5p
	#N/A	ZBTB7A	hsa-mir-106b-5p
	#N/A	MLLT6	hsa-mir-195-5p
	#N/A	RAF1	hsa-mir-16-5p
	#N/A	GALNT1	hsa-mir-15a-5p
	#N/A	AKAP11	hsa-mir-195-5p
	#N/A	EDEM1	hsa-mir-125b-5p
	#N/A	CLIP1	hsa-mir-103a-3p
	#N/A	ZNF622	hsa-mir-15a-5p
	#N/A	ZNF268	hsa-mir-181d-5p
	#N/A	RAB5C	hsa-mir-18a-5p
	#N/A	RIT1	hsa-mir-218-5p
	#N/A	KLF11	hsa-mir-93-5p
	#N/A	KLF6	hsa-mir-181a-5p
	#N/A	MCC	hsa-mir-20b-5p
	#N/A	KIF5A	hsa-mir-103a-3p
	#N/A	VAV2	hsa-mir-331-3p
	#N/A	SLC6A4	hsa-mir-16-5p
	#N/A	CAPRIN2	hsa-mir-106b-5p
	#N/A	ADARB1	hsa-mir-93-5p
	#N/A	CUL3	hsa-mir-301a-3p
	#N/A	LIMA1	hsa-mir-20a-5p
	#N/A	ZNF594	hsa-mir-181a-5p
	#N/A	VGLL3	hsa-mir-24-3p
	#N/A	FAM13B	hsa-mir-218-5p
	#N/A	BTBD3	hsa-mir-148a-3p
	#N/A	METAP1	hsa-mir-181a-5p
	#N/A	C8orf58	hsa-mir-23b-3p
	#N/A	THRA	hsa-mir-143-5p
	#N/A	NEDD9	hsa-mir-18a-5p
	#N/A	GNS	hsa-mir-17-5p
	#N/A	SOS2	hsa-mir-148a-3p
	#N/A	2018-09-02	hsa-mir-140-5p
	#N/A	PAIP2	hsa-mir-27b-3p
	#N/A	H3F3B	hsa-mir-10b-5p
	#N/A	RUNX1T1	hsa-mir-195-5p
	#N/A	KIF23	hsa-mir-106a-5p
	#N/A	DLG5	hsa-mir-130a-3p
	#N/A	ZCCHC3	hsa-mir-15a-5p
	#N/A	NFASC	hsa-mir-4290
	#N/A	CPEB3	hsa-mir-16-5p
	#N/A	ZBTB9	hsa-mir-20a-5p
	#N/A	FBXL20	hsa-mir-15a-5p
	#N/A	ADIPOR2	hsa-mir-19a-3p
	#N/A	GOLGA8B	hsa-mir-32-5p
	#N/A	TNPO1	hsa-mir-23a-3p
	#N/A	TNKS2	hsa-mir-20a-5p
	#N/A	CHL1	hsa-mir-10a-5p
	#N/A	ABI2	hsa-mir-331-3p
	#N/A	CNOT6L	hsa-mir-20b-5p
	#N/A	PPP1R15B	hsa-mir-106b-5p
	#N/A	BOD1	hsa-mir-142-3p
	#N/A	ATAD2	hsa-mir-93-5p
	#N/A	PXK	hsa-mir-20a-5p
	#N/A	TRPS1	hsa-mir-374c-5p
	#N/A	LITAF	hsa-mir-15a-5p
	#N/A	RPS6KA5	hsa-mir-19a-3p
	#N/A	GABARAPL1	hsa-mir-195-5p
	#N/A	NPAT	hsa-mir-17-5p
	#N/A	NAA30	hsa-mir-98-5p
	#N/A	FBN2	hsa-mir-23b-3p
	#N/A	FURIN	hsa-mir-103a-3p
	#N/A	LEFTY1	hsa-mir-143-5p
	#N/A	PBXIP1	hsa-mir-148a-3p
	#N/A	EPC1	hsa-mir-16-5p
	#N/A	ITPR1	hsa-mir-16-5p
	#N/A	TRAK1	hsa-mir-195-5p
	#N/A	MAP3K3	hsa-mir-145-5p
	#N/A	SGPL1	hsa-mir-4324
	#N/A	ANAPC16	hsa-mir-125b-5p
	#N/A	BRMS1L	hsa-mir-20a-5p
	#N/A	FEM1C	hsa-mir-17-5p
	#N/A	FOXJ2	hsa-mir-20b-5p
	#N/A	HNRNPF	hsa-mir-27a-3p
	#N/A	ZNFX1	hsa-mir-106a-5p
	#N/A	TMEM123	hsa-mir-93-5p
	#N/A	IL17RD	hsa-mir-335-5p
	#N/A	FKBP5	hsa-mir-660-3p
	#N/A	KIAA0513	hsa-mir-17-5p
	#N/A	USP32	hsa-mir-17-5p
	#N/A	KLHL20	hsa-mir-19a-3p
	#N/A	ZBTB33	hsa-mir-16-5p
	#N/A	USP37	hsa-mir-19a-3p
	#N/A	SPOPL	hsa-mir-106b-5p
	#N/A	AFF4	hsa-mir-27b-3p
	#N/A	RUNDC1	hsa-mir-17-5p
	#N/A	STAT3	hsa-mir-106b-5p
	#N/A	CPEB2	hsa-mir-92a-3p
	#N/A	IRF2BP2	hsa-mir-103a-3p
	#N/A	FOXJ3	hsa-mir-106a-5p
	#N/A	TLE4	hsa-mir-15a-5p
	#N/A	PPP6R3	hsa-mir-130a-3p
	#N/A	EIF5A2	hsa-mir-20b-5p
	#N/A	MAP3K3	hsa-mir-20a-5p
	#N/A	PAPD5	hsa-mir-181d-5p
	#N/A	SLC12A7	hsa-mir-454-3p
	#N/A	TXLNA	hsa-mir-106b-5p
	#N/A	ANKRD13C	hsa-mir-93-5p
	#N/A	UBTF	hsa-mir-3175
	#N/A	IFNAR2	hsa-mir-4279
	#N/A	AMER1	hsa-mir-16-5p
	#N/A	ZNF417	hsa-mir-4291
	#N/A	NIN	hsa-mir-106a-5p
	#N/A	CHAF1A	hsa-mir-17-5p
	#N/A	ABHD17C	hsa-mir-27b-3p
	#N/A	MEN1	hsa-mir-24-3p
	#N/A	DDIT4	hsa-mir-181a-5p
	#N/A	VPS26A	hsa-mir-20a-5p
	#N/A	ETNK1	hsa-mir-23b-3p
	#N/A	CDC37L1	hsa-mir-106b-5p
	#N/A	MAPK14	hsa-mir-24-3p
	#N/A	FYCO1	hsa-mir-20a-5p
	#N/A	ANKFY1	hsa-mir-106b-5p
	#N/A	FOXO3	hsa-mir-223-3p
	#N/A	C5orf51	hsa-mir-21-3p
	#N/A	DUSP5	hsa-mir-92a-3p
	#N/A	MED12L	hsa-mir-19a-3p
	#N/A	MAP7D1	hsa-mir-18a-5p
	#N/A	KIF23	hsa-mir-195-5p
	#N/A	CAMTA1	hsa-mir-17-5p
	#N/A	PRICKLE2	hsa-mir-21-5p
	#N/A	HOXB5	hsa-mir-1275
	#N/A	ZBTB9	hsa-mir-20b-5p
	#N/A	ACBD5	hsa-mir-301a-3p
	#N/A	CAPN5	hsa-mir-214-3p
	#N/A	IRF1	hsa-mir-130a-3p
	#N/A	PPP2R2A	hsa-mir-218-5p
	#N/A	GPATCH2	hsa-mir-93-5p
	#N/A	FBXL5	hsa-mir-20b-5p
	#N/A	ORMDL1	hsa-mir-4290
	#N/A	BMP8B	hsa-mir-93-5p
	#N/A	RPS6KA3	hsa-mir-15a-5p
	#N/A	RBM25	hsa-mir-181b-5p
	#N/A	ZNF699	hsa-mir-181a-5p
	#N/A	SCAMP5	hsa-mir-20a-5p
	#N/A	CCDC28A	hsa-mir-26b-5p
	#N/A	2018-09-02	hsa-mir-93-5p
	#N/A	BTBD3	hsa-mir-454-3p
	#N/A	ACTR2	hsa-mir-15a-5p
	#N/A	SAMD12	hsa-mir-106a-5p
	#N/A	MACF1	hsa-mir-19a-3p
	#N/A	ATG16L1	hsa-mir-106b-5p
	#N/A	E2F2	hsa-mir-93-5p
	#N/A	KIF13A	hsa-mir-301a-3p
	#N/A	UBN2	hsa-mir-454-3p
	#N/A	KLF3	hsa-mir-20b-5p
	#N/A	GON4L	hsa-mir-106b-5p
	#N/A	CALU	hsa-mir-16-5p
	#N/A	SBF2	hsa-mir-19a-3p
	#N/A	LRRFIP2	hsa-mir-16-5p
	#N/A	HSP90B1	hsa-mir-223-3p
	#N/A	N4BP1	hsa-mir-195-5p
	#N/A	PTGFRN	hsa-mir-17-5p
	#N/A	HSP90B1	hsa-mir-181b-5p
	#N/A	BCL2L11	hsa-mir-24-3p
	#N/A	SLC10A7	hsa-mir-181d-5p
	#N/A	MEN1	hsa-mir-1275
	#N/A	CDKN1B	hsa-mir-196b-5p
	#N/A	ZFYVE9	hsa-mir-20b-5p
	#N/A	CRY2	hsa-mir-93-5p
	#N/A	E2F5	hsa-mir-20a-5p
	#N/A	CRY2	hsa-mir-106b-5p
	#N/A	SIK1	hsa-mir-106b-5p
	#N/A	BTG3	hsa-mir-106a-5p
	#N/A	FBXL5	hsa-mir-20a-5p
	#N/A	CSF1	hsa-mir-130a-3p
	#N/A	HOXC8	hsa-mir-148a-3p
	#N/A	TEF	hsa-mir-92a-3p
	#N/A	SATB1	hsa-mir-374c-5p
	#N/A	FLI1	hsa-mir-145-5p
	#N/A	VEGFA	hsa-mir-140-5p
	#N/A	CDADC1	hsa-mir-454-3p
	#N/A	PAFAH1B1	hsa-mir-195-5p
	#N/A	GNG12	hsa-mir-27b-3p
	#N/A	IL1B	hsa-mir-21-5p
	#N/A	HSP90B1	hsa-mir-181d-5p
	#N/A	FAM3C	hsa-mir-181a-5p
	#N/A	ZXDA	hsa-mir-24-3p
	#N/A	NUCKS1	hsa-mir-16-5p
	#N/A	JARID2	hsa-mir-454-3p
	#N/A	DCBLD2	hsa-mir-218-5p
	#N/A	AFF1	hsa-mir-142-3p
	#N/A	PPP3R1	hsa-mir-17-5p
	#N/A	SPTLC1	hsa-mir-16-5p
	#N/A	EGLN3	hsa-mir-20a-5p
	#N/A	TPM2	hsa-mir-195-5p
	#N/A	KIF1B	hsa-mir-16-5p
	#N/A	BOLA3	hsa-mir-374b-5p
	#N/A	PDZD11	hsa-mir-17-5p
	#N/A	SERBP1	hsa-mir-15a-5p
	#N/A	PGM2L1	hsa-mir-93-5p
	#N/A	AGO4	hsa-mir-195-5p
	#N/A	ARIH1	hsa-mir-103a-3p
	#N/A	RPA2	hsa-mir-106b-5p
	#N/A	CHUK	hsa-mir-16-5p
	#N/A	NR3C1	hsa-mir-18a-5p
	#N/A	RAB10	hsa-mir-103a-3p
	#N/A	FAM3C	hsa-mir-18a-5p
	#N/A	HDAC7	hsa-mir-140-5p
	#N/A	LIN7C	hsa-mir-4291
	#N/A	STXBP3	hsa-mir-195-5p
	#N/A	ANKRD52	hsa-mir-20a-5p
	#N/A	PDE4D	hsa-mir-18a-5p
	#N/A	RAB5B	hsa-mir-20a-5p
	#N/A	SPATA2	hsa-mir-19a-3p
	#N/A	KCNA4	hsa-mir-377-3p
	#N/A	VPS37A	hsa-mir-301a-3p
	#N/A	ARHGAP12	hsa-mir-17-5p
	#N/A	TNRC6B	hsa-mir-26b-5p
	#N/A	PPP1R11	hsa-mir-15a-5p
	#N/A	CRTAP	hsa-mir-4284
	#N/A	ADAM10	hsa-mir-92a-3p
	#N/A	KMT2D	hsa-mir-1275
	#N/A	KIAA1551	hsa-mir-27b-3p
	#N/A	HMGA1	hsa-mir-98-5p
	#N/A	PAX9	hsa-mir-92a-3p
	#N/A	GLCCI1	hsa-mir-21-5p
	#N/A	UQCRFS1	hsa-mir-23b-3p
	#N/A	ZNF268	hsa-mir-181a-5p
	#N/A	RAP1B	hsa-mir-27a-3p
	#N/A	SPRED1	hsa-mir-20b-5p
	#N/A	LAMC1	hsa-mir-16-5p
	#N/A	YOD1	hsa-mir-17-5p
	#N/A	OR6A2	hsa-mir-4279
	#N/A	NACC2	hsa-mir-106b-5p
	#N/A	PPP1R15B	hsa-mir-98-5p
	#N/A	EOGT	hsa-mir-454-3p
	#N/A	HDGF	hsa-mir-214-3p
	#N/A	PDIA5	hsa-mir-27a-3p
	#N/A	PPP3R1	hsa-mir-26b-5p
	#N/A	IMPDH1	hsa-mir-19a-3p
	#N/A	SSX2IP	hsa-mir-20b-5p
	#N/A	FNBP1L	hsa-mir-20a-5p
	#N/A	LRRC2	hsa-mir-26b-5p
	#N/A	IRF2	hsa-mir-18a-5p
	#N/A	CFL2	hsa-mir-454-3p
	#N/A	DEPDC1	hsa-mir-1297
	#N/A	USP45	hsa-mir-32-5p
	#N/A	KAT7	hsa-mir-142-3p
	#N/A	SLC38A2	hsa-mir-26b-5p
	#N/A	LBR	hsa-mir-148a-3p
	#N/A	LIMK1	hsa-mir-17-5p
	#N/A	MAFK	hsa-mir-195-5p
	#N/A	LIMK1	hsa-mir-106b-5p
	#N/A	CLSPN	hsa-mir-195-5p
	#N/A	NUS1	hsa-mir-26b-5p
	#N/A	UQCRFS1	hsa-mir-23a-3p
	#N/A	ASH1L	hsa-mir-377-3p
	#N/A	UNK	hsa-mir-20b-5p
	#N/A	PLXND1	hsa-mir-199a-5p
	#N/A	SALL3	hsa-mir-301a-3p
	#N/A	FNIP1	hsa-mir-23a-3p
	#N/A	IGSF3	hsa-mir-103a-3p
	#N/A	ZMAT3	hsa-mir-454-3p
	#N/A	FRMD6	hsa-mir-106b-5p
	#N/A	CDC27	hsa-mir-195-5p
	#N/A	PAPD5	hsa-mir-181b-5p
	#N/A	HMBOX1	hsa-mir-16-5p
	#N/A	PIK3AP1	hsa-mir-32-5p
	#N/A	EFCAB14	hsa-mir-20b-5p
	#N/A	POM121C	hsa-mir-15a-5p
	#N/A	PLXNA2	hsa-mir-26b-5p
	#N/A	ELOVL2	hsa-mir-10a-5p
	LZTS1	LZTS1	hsa-mir-214-3p
	#N/A	RASSF2	hsa-mir-195-5p
	#N/A	CD2AP	hsa-mir-92a-3p
	#N/A	STK11	hsa-mir-17-5p
	#N/A	BTF3L4	hsa-mir-301a-3p
	#N/A	TARBP2	hsa-mir-98-5p
	#N/A	EPS15	hsa-mir-19a-3p
	#N/A	MTDH	hsa-mir-1297
	#N/A	FBXW7	hsa-mir-27a-3p
	#N/A	DNAJB9	hsa-mir-20b-5p
	#N/A	GPBP1L1	hsa-mir-32-5p
	#N/A	SURF4	hsa-mir-665
	#N/A	CPEB2	hsa-mir-142-3p
	#N/A	CHIC1	hsa-mir-20b-5p
	#N/A	MYCN	hsa-mir-19a-3p
	#N/A	OTUD3	hsa-mir-92a-3p
	#N/A	MBNL1	hsa-mir-130a-3p
	#N/A	STARD13	hsa-mir-130a-3p
	#N/A	PCTP	hsa-mir-4324
	#N/A	ANGPT4	hsa-mir-665
	#N/A	PDHX	hsa-mir-26b-5p
	#N/A	FGF9	hsa-mir-140-5p
	#N/A	PHLPP2	hsa-mir-15a-5p
	#N/A	CRIM1	hsa-mir-195-5p
	#N/A	C1orf21	hsa-mir-16-5p
	#N/A	RORA	hsa-mir-19a-3p
	#N/A	ZNF280B	hsa-mir-93-5p
	#N/A	HOXC8	hsa-mir-126-5p
	#N/A	MASTL	hsa-mir-106a-5p
	#N/A	ZDHHC5	hsa-mir-374b-5p
	#N/A	TRIM2	hsa-mir-181a-5p
	#N/A	AFF4	hsa-mir-16-5p
	LZTS1	LZTS1	hsa-mir-135b-5p
	#N/A	NTF3	hsa-mir-21-5p
[truncated: 4,350 more rows]

## Sheet: Sheet11
miRNA	taRget Gene			miRNA	taRget Gene
hsa-miR-27b	EDNRA			hsa-miR-27	EDNRA
hsa-miR-195	TMEM161B			hsa-miR-195	TMEM161B
hsa-miR-148a	ITGA5			hsa-miR-148	ITGA5
hsa-miR-193a	PLAU			hsa-miR-193	PLAU
hsa-miR-19a	SGK1			hsa-miR-19a	SGK1
hsa-miR-93	RGMB			hsa-miR-93	RGMB
hsa-miR-32	PBLD			hsa-miR-32	PBLD
hsa-miR-20a	RGMB			hsa-miR-20a	RGMB
hsa-miR-196b	HOXB7			hsa-miR-196	HOXB7
hsa-miR-16	TMEM161B			hsa-miR-16	TMEM161B
hsa-miR-19a	UBL3			hsa-miR-19	UBL3
hsa-miR-195	SIDT2			hsa-miR-195	SIDT2
hsa-miR-218	COL4A1			hsa-miR-218	COL4A1
hsa-miR-143	COL5A2			hsa-miR-143	COL5A2
hsa-miR-103a	PDK4			hsa-miR-103	PDK4
hsa-miR-26b	ASPN			hsa-miR-26	ASPN
hsa-miR-106b	RGMB			hsa-miR-106	RGMB
hsa-miR-24	MAGI1			hsa-miR-24	MAGI1
hsa-miR-23b	CA2			hsa-miR-23	CA2
hsa-miR-218	LYPD6B			hsa-miR-218	LYPD6B
hsa-miR-660	GPR155			hsa-miR-660	GPR155
hsa-miR-214	LZTS1			hsa-miR-214	LZTS1
hsa-miR-135b	LZTS1			hsa-miR-135	LZTS1
hsa-miR-331	NRP2			hsa-miR-331	NRP2
hsa-miR-27b	NFE2L2			hsa-miR-27	NFE2L2
hsa-miR-27a	LIFR			hsa-miR-27	LIFR
hsa-miR-106a	RGMB			hsa-miR-106	RGMB
hsa-miR-145	MEST			hsa-miR-145	MEST
hsa-miR-103a	VCAN			hsa-miR-103	VCAN
hsa-miR-98	ABCC5			hsa-miR-98	ABCC5
hsa-miR-16	SIDT2			hsa-miR-16	SIDT2
hsa-miR-20b	RGMB			hsa-miR-20	RGMB
hsa-miR-196a	HOXB7			hsa-miR-196	HOXB7
hsa-miR-195	SH3BGRL2			hsa-miR-195	SH3BGRL2
hsa-miR-24	MT1E			hsa-miR-24	MT1E
hsa-miR-342	SLC41A2			hsa-miR-342	SLC41A2
hsa-miR-26b	RPS6KA6			hsa-miR-26	RPS6KA6
hsa-miR-27a	NFE2L2			hsa-miR-27	NFE2L2
hsa-miR-98	ACER2			hsa-miR-98	ACER2
hsa-miR-17	RGMB			hsa-miR-17	RGMB
hsa-miR-145	PDGFD			hsa-miR-145	PDGFD
hsa-miR-15a	HOXA10			hsa-miR-15	HOXA10
hsa-miR-92a	ITGA5			hsa-miR-92	ITGA5
hsa-miR-145	MYRF			hsa-miR-145	MYRF
hsa-miR-195	HOXA10			hsa-miR-195	HOXA10
hsa-miR-27a	HOXA10			hsa-miR-27	HOXA10
hsa-miR-15a	TMEM161B			hsa-miR-15	TMEM161B
hsa-miR-181a	PLXDC2			hsa-miR-181	PLXDC2
hsa-miR-196a	IGF2BP3			hsa-miR-196	IGF2BP3
hsa-miR-3175	SLC26A9			hsa-miR-3175	SLC26A9
hsa-miR-27b	HOXA10			hsa-miR-27	HOXA10
hsa-miR-16	SLC39A10			hsa-miR-16	SLC39A10
hsa-miR-98	IGF2BP3			hsa-miR-98	IGF2BP3
hsa-miR-15a	SIDT2			hsa-miR-15	SIDT2
hsa-miR-196b	ACER2			hsa-miR-196	ACER2
hsa-miR-19a	THBS1			hsa-miR-20	THBS1
hsa-miR-374a	CEBPB			hsa-miR-374	CEBPB
hsa-miR-196a	ACER2			hsa-miR-196	ACER2
hsa-miR-4279	RAB27A			hsa-miR-4279	RAB27A
hsa-miR-16	HOXA10			hsa-miR-16	HOXA10
hsa-miR-196a	IGF2BP3			hsa-miR-196	IGF2BP3
hsa-miR-27b	LIFR			hsa-miR-27	LIFR
hsa-miR-1275	COL1A2			hsa-miR-1275	COL1A2
hsa-miR-143	COL1A1			hsa-miR-143	COL1A1
hsa-miR-16	PDK4			hsa-miR-16	PDK4
hsa-miR-98	FGD6			hsa-miR-98	FGD6

[truncated: 9 more sheets: Sheet5, Sheet12, Sheet10, Sheet2, Mirad全, Sheet14, GSE54397, Sheet15, Sheet16]
